# Supplementary material
Source: PubMed Central journal article supplement (PMC4186672)
Supplement: ic5013523_si_001.pdf [file ic5013523_si_001.pdf]

## **Supporting Information**

# **Computational Investigation of [FeFe]-Hydrogenase Models: Characterization of Singly and Doubly Protonated Intermediates and Mechanistic Insights**

Mioy T. Huynh, Wenguang Wang, Thomas B. Rauchfuss, and Sharon Hammes-Schiffer\*

Department of Chemistry, 600 South Mathews Avenue, University of Illinois  
at Urbana-Champaign, Urbana, Illinois 61801, United States

\*corresponding author: [shs3@illinois.edu](mailto:shs3@illinois.edu)

## Table of Contents

| <b>Experimental</b>                                                                                                                                                                                                                                   | <b>Page</b> |
|-------------------------------------------------------------------------------------------------------------------------------------------------------------------------------------------------------------------------------------------------------|-------------|
| 1. Experimental Methods .....                                                                                                                                                                                                                         | S3          |
| 2. $^{31}\text{P}$ NMR Spectra of $[(\text{Fe}^{\text{I}}\text{Fe}^{\text{I}})\text{adt}]^0$ , $[(\text{Fe}^{\text{I}}\text{Fe}^{\text{I}})\text{adt}-\text{H}]^+$ , and $[\text{tH}-(\text{Fe}^{\text{II}}\text{Fe}^{\text{II}})\text{adt}]^+$ ..... | S4          |
| <i>Figures S1 – S3</i>                                                                                                                                                                                                                                |             |
| 3. $^1\text{H}$ NMR Spectra of $[\text{tH}-(\text{Fe}^{\text{II}}\text{Fe}^{\text{II}})\text{adt}]^+$ and <i>unsym</i> - $[\mu\text{H}-(\text{Fe}^{\text{II}}\text{Fe}^{\text{II}})\text{adt}]^+$ .....                                               | S7          |
| <i>Figure S4</i>                                                                                                                                                                                                                                      |             |
| 4. $^{31}\text{P}$ NMR Spectra of $[(\text{Fe}^{\text{I}}\text{Fe}^{\text{I}})\text{adt}]^0$ , $[\text{tH}-(\text{Fe}^{\text{II}}\text{Fe}^{\text{II}})\text{adt}]^+$ and Homoconjugates .....                                                        | S8          |
| <i>Figure S5</i>                                                                                                                                                                                                                                      |             |
| 5. FT-IR Spectrum of $[\text{tH}-(\text{Fe}^{\text{II}}\text{Fe}^{\text{II}})\text{adt}]^+$ and $[\text{tH}-(\text{Fe}^{\text{II}}\text{Fe}^{\text{II}})\text{adt}-\text{H}]^{2+}$ .....                                                              | S9          |
| <i>Figure S6</i>                                                                                                                                                                                                                                      |             |
| 6. FT-IR Spectrum of <i>unsym</i> - $[\mu\text{H}-(\text{Fe}^{\text{II}}\text{Fe}^{\text{II}})\text{adt}]^+$ and <i>sym</i> - $[\mu\text{H}-(\text{Fe}^{\text{II}}\text{Fe}^{\text{II}})\text{adt}-\text{H}]^{2+}$ .....                              | S10         |
| <i>Figure S7</i>                                                                                                                                                                                                                                      |             |
| 7. NMR Spectra of <i>sym</i> - $[\mu\text{H}-(\text{Fe}^{\text{II}}\text{Fe}^{\text{II}})\text{adt}]^+$ and <i>unsym</i> - $[\mu\text{H}-(\text{Fe}^{\text{II}}\text{Fe}^{\text{II}})\text{adt}]^+$ .....                                             | S11         |
| <i>Figures S8 – S9</i>                                                                                                                                                                                                                                |             |
| 8. NMR Spectra of <i>sym</i> - $[\mu\text{H}-(\text{Fe}^{\text{II}}\text{Fe}^{\text{II}})\text{adt}-\text{H}]^{2+}$ and <i>unsym</i> - $[\mu\text{H}-(\text{Fe}^{\text{II}}\text{Fe}^{\text{II}})\text{adt}-\text{H}]^{2+}$ .....                     | S13         |
| <i>Figures S10 – S11</i>                                                                                                                                                                                                                              |             |
| 9. $^{31}\text{P}$ NMR Spectrum of $[(\text{Fe}^{\text{I}}\text{Fe}^{\text{I}})\text{adt}]^0$ Treated with 2 Equivalents of $[\text{Ph}_2\text{NH}_2]\text{BAr}^{\text{F}}_4$ .....                                                                   | S15         |
| <i>Figure S12</i>                                                                                                                                                                                                                                     |             |
| 10. $^{31}\text{P}$ NMR Spectrum of $[(\text{Fe}^{\text{I}}\text{Fe}^{\text{I}})\text{adt}]^0$ Treated with 1 Equivalent of $[\text{Me}_3\text{NH}]\text{BAr}^{\text{F}}_4$ .....                                                                     | S16         |
| <i>Figure S13</i>                                                                                                                                                                                                                                     |             |
| 11. Hetero- and Homoconjugates of Singly Protonated $[(\text{FeFe})\text{adt}]$ Species .....                                                                                                                                                         | S17         |
| <i>Figure S14</i>                                                                                                                                                                                                                                     |             |
| 12. Estimation of $\text{p}K_{\text{a}}$ Values .....                                                                                                                                                                                                 | S18         |
| <br>                                                                                                                                                                                                                                                  |             |
| <b>Computational</b>                                                                                                                                                                                                                                  | <b>Page</b> |
| 13. Computational Details (Summary) .....                                                                                                                                                                                                             | S21         |
| 14. Relative Free Energies ( $\Delta G^\circ$ ) of Singly Protonated Isomers .....                                                                                                                                                                    | S22         |
| <i>Figure S15</i>                                                                                                                                                                                                                                     |             |
| 15. Relative Free Energies ( $\Delta G^\circ$ ) of Doubly Protonated Isomers .....                                                                                                                                                                    | S23         |
| <i>Figure S16</i>                                                                                                                                                                                                                                     |             |
| 16. Protonation Scheme and $\Delta\nu_{\text{CO}}$ for $[(\text{FeFe})\text{pdt}]$ .....                                                                                                                                                              | S24         |
| <i>Figure S17 and Table S1</i>                                                                                                                                                                                                                        |             |
| 17. Comparison of Crystal Structure vs. DFT Optimized Structures .....                                                                                                                                                                                | S25         |
| <i>Tables S2-S3</i>                                                                                                                                                                                                                                   |             |
| 18. Experimental and Calculated Absolute $\nu_{\text{CO}}$ Values .....                                                                                                                                                                               | S25         |
| <i>Table S4</i>                                                                                                                                                                                                                                       |             |
| 19. Expanded Table of Calculated Reduction Potentials .....                                                                                                                                                                                           | S26         |
| <i>Table S5</i>                                                                                                                                                                                                                                       |             |
| 20. Spin Densities of Reduced Mixed Valence $[(\text{FeFe})\text{pdt}]$ Species .....                                                                                                                                                                 | S26         |
| <i>Tables S6-S7</i>                                                                                                                                                                                                                                   |             |
| 21. Calculated $\Delta\text{p}K_{\text{a}}$ Values .....                                                                                                                                                                                              | S27         |
| <i>Table S8</i>                                                                                                                                                                                                                                       |             |
| 22. Structural and Energetic Information for all $[(\text{FeFe})\text{pdt}]$ Species .....                                                                                                                                                            | S28         |
| <i>Tables S9-S16</i>                                                                                                                                                                                                                                  |             |
| 23. Structural and Energetic Information for all $[(\text{FeFe})\text{adt}]$ Species .....                                                                                                                                                            | S52         |
| <i>Tables S17-S34</i>                                                                                                                                                                                                                                 |             |
| 24. References .....                                                                                                                                                                                                                                  | S106        |

## EXPERIMENTAL METHODS

Compounds of  $\text{Fe}_2(\text{pdt})(\text{dppv})_2(\text{CO})_2$  ( $[(\text{Fe}^{\text{I}}\text{Fe}^{\text{I}})\text{pdt}]^0$ ) and  $\text{Fe}_2(\text{adt})(\text{dppv})_2(\text{CO})_2$  ( $[(\text{Fe}^{\text{I}}\text{Fe}^{\text{I}})\text{adt}]^0$ ) as referenced in the main text were prepared according to reported procedures.<sup>1</sup> FT-IR measurements (in  $\text{cm}^{-1}$ ) are reported for the  $\nu_{\text{CO}}$  region only. Additional experimental conditions are provided in the captions of the following spectra.

**Low-temperature Protonation.** Protonation of  $[(\text{Fe}^{\text{I}}\text{Fe}^{\text{I}})\text{adt}]^0$  followed a previously described procedure.<sup>2</sup> In a typical experiment, in a J. Young NMR tube ca. 0.6 mL  $\text{CD}_2\text{Cl}_2$  was distilled onto  $[(\text{Fe}^{\text{I}}\text{Fe}^{\text{I}})\text{adt}]^0$  (6 mg, 0.006 mmol) and  $[\text{H}(\text{OEt}_2)_2]\text{BAr}^{\text{F}}_4$  (6 mg, 0.006 mmol). The J. Young tube was then placed directly into a  $\text{CH}_3\text{CN}/\text{dry ice}$  bath and analyzed with low temperature NMR spectroscopy at  $-40$  °C.

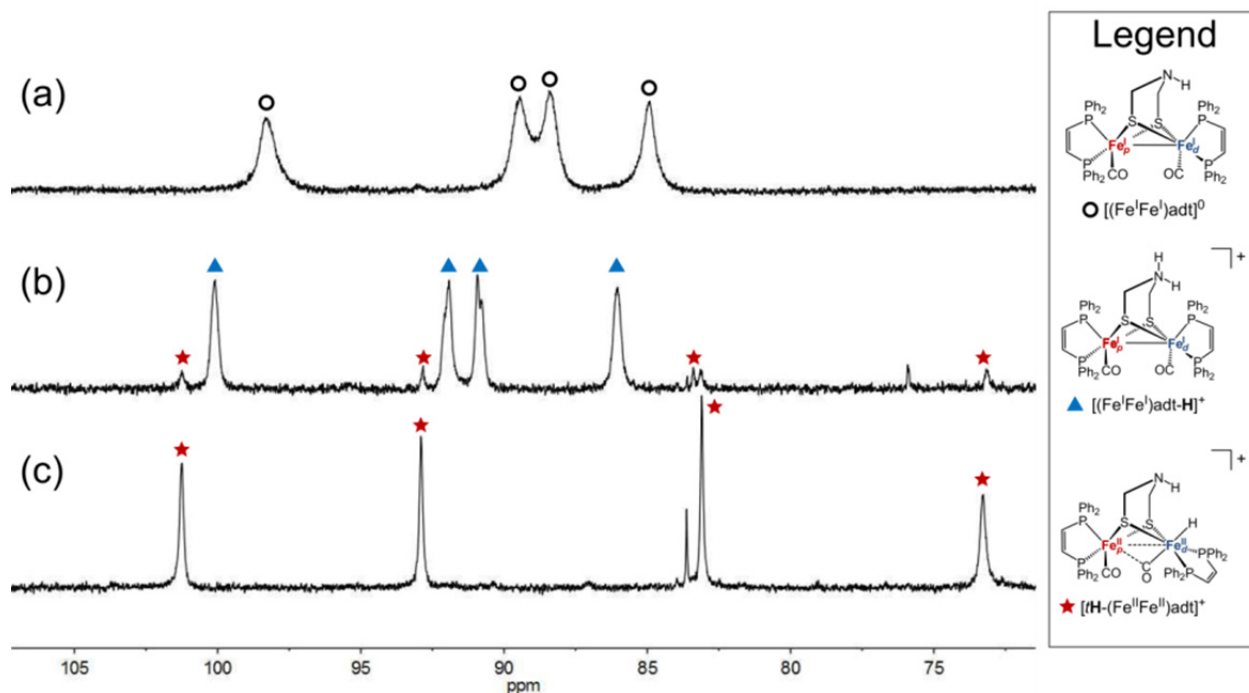

**Figure S1.**  $^{31}\text{P}$  NMR spectra at  $-40\text{ }^\circ\text{C}$  of  $[(\text{FeFe})\text{adt}]$  species in  $\text{CD}_2\text{Cl}_2$  solvent. The Fe centers have been labeled  $\text{Fe}_p$  and  $\text{Fe}_d$  for consistency, although this labeling is only chemically meaningful for the terminal hydride species. (a) Spectrum for  $[(\text{Fe}^{\text{I}}\text{Fe}^{\text{I}})\text{adt}]^0$  before addition of acid. Four nonequivalent phosphine peaks are observed, consistent with both diphosphine ligands occupying the apical-basal sites with relatively rigid azadithiolate (adt) bridge enforcing nonequivalency. (b)  $[(\text{Fe}^{\text{I}}\text{Fe}^{\text{I}})\text{adt}]^0$  after treatment with  $[\text{Me}_3\text{NH}]^+$  acid. The blue triangles correspond to the ammonium tautomer,  $[(\text{Fe}^{\text{I}}\text{Fe}^{\text{I}})\text{adt}-\text{H}]^+$ , which exhibits heteroconjugation via hydrogen bonding between  $[\text{Me}_3\text{NH}]^+$  and the adt (see **Figure S14b**). A small fraction of the terminal hydride species,  $[t\text{H}-(\text{Fe}^{\text{II}}\text{Fe}^{\text{II}})\text{adt}]^+$ , is evident (red stars). (c) Spectrum of the terminal hydride species (red stars),  $[t\text{H}-(\text{Fe}^{\text{II}}\text{Fe}^{\text{II}})\text{adt}]^+$ , produced by treatment of  $[(\text{Fe}^{\text{I}}\text{Fe}^{\text{I}})\text{adt}]^0$  with the strong acid  $[\text{H}(\text{OEt}_2)_2]\text{BAR}^{\text{F}4}$ . No traces of the ammonium tautomer are seen.

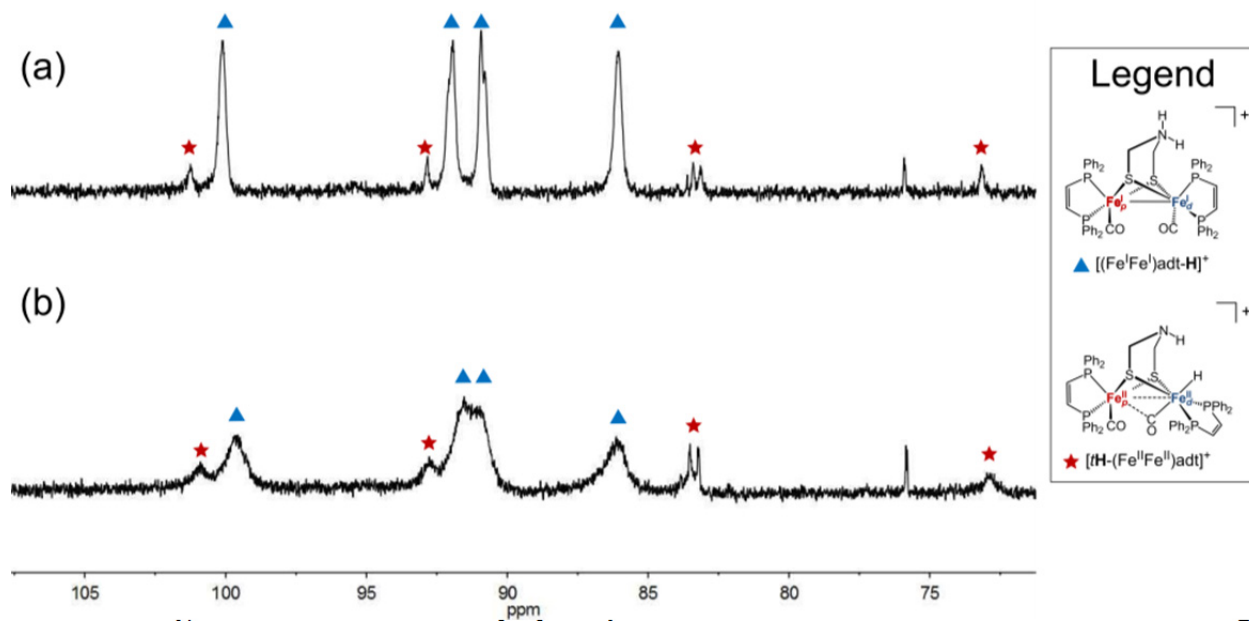

**Figure S2.**  $^{31}\text{P}$  NMR spectra of  $[(\text{Fe}^{\text{I}}\text{Fe}^{\text{I}})\text{adt}]^0$  species (in  $\text{CD}_2\text{Cl}_2$  solvent) with  $[\text{Me}_3\text{NH}]\text{BAr}^{\text{F}}_4$  at (a)  $-40\text{ }^\circ\text{C}$  and (b)  $-20\text{ }^\circ\text{C}$ . All species,  $[(\text{H}\text{-}(\text{Fe}^{\text{II}}\text{Fe}^{\text{II}})\text{adt})]^+$  (red stars) and  $[(\text{Fe}^{\text{I}}\text{Fe}^{\text{I}})\text{adt}\text{-H}]^+$  (blue triangles), experience dynamical broadening. The Fe centers have been labeled  $\text{Fe}_p$  and  $\text{Fe}_d$  for consistency, although this labeling is only chemically meaningful for the terminal hydride species.

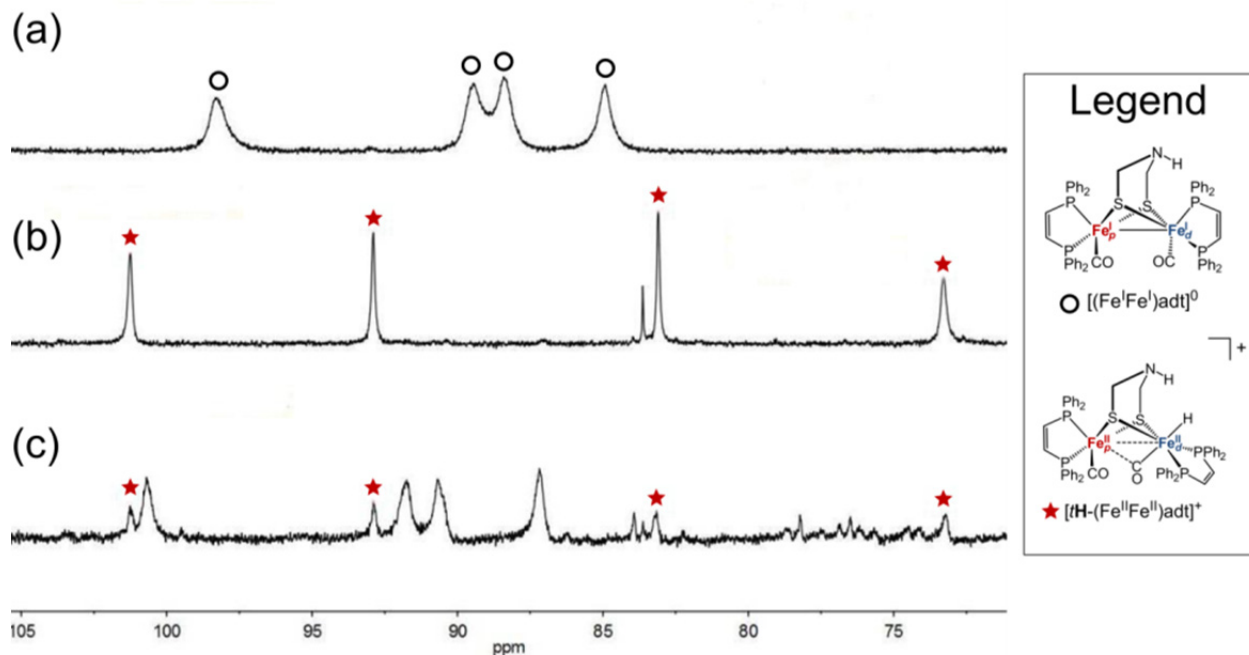

**Figure S3.**  $^{31}\text{P}$  NMR spectra (at  $-40\text{ }^\circ\text{C}$  in  $\text{CD}_2\text{Cl}_2$  solvent) of  $[(\text{Fe}^{\text{I}}\text{Fe}^{\text{I}})\text{adt}]^0$  species (a) before the addition of acid, (b) after treatment with 1 equiv of the strong acid  $[\text{H}(\text{OEt}_2)_2]\text{BAR}^{\text{F}_4}$ , and (c) after treatment with 0.5 equiv of  $[\text{H}(\text{OEt}_2)_2]\text{BAR}^{\text{F}_4}$ . The spectrum in (b) shows that in  $\text{CD}_2\text{Cl}_2$ , one equiv of strong acid exclusively results in protonation at a single Fe site to form the terminal hydride,  $[\text{tH}-(\text{Fe}^{\text{II}}\text{Fe}^{\text{II}})\text{adt}]^+$  (red stars). The spectrum in (c) shows that treating  $[(\text{Fe}^{\text{I}}\text{Fe}^{\text{I}})\text{adt}]^0$  with 0.5 equiv of strong acid results in only a fraction of the terminal hydride species forming. The main species is assigned to the homoconjugated species,  $[(\text{Fe}^{\text{I}}\text{Fe}^{\text{I}})\text{adt}-\text{H}-\text{adt}(\text{Fe}^{\text{I}}\text{Fe}^{\text{I}})]^+$  (see **Figure S14c**). The Fe centers have been labeled  $\text{Fe}_p$  and  $\text{Fe}_d$  for consistency, although this labeling is only chemically meaningful for the terminal hydride species.

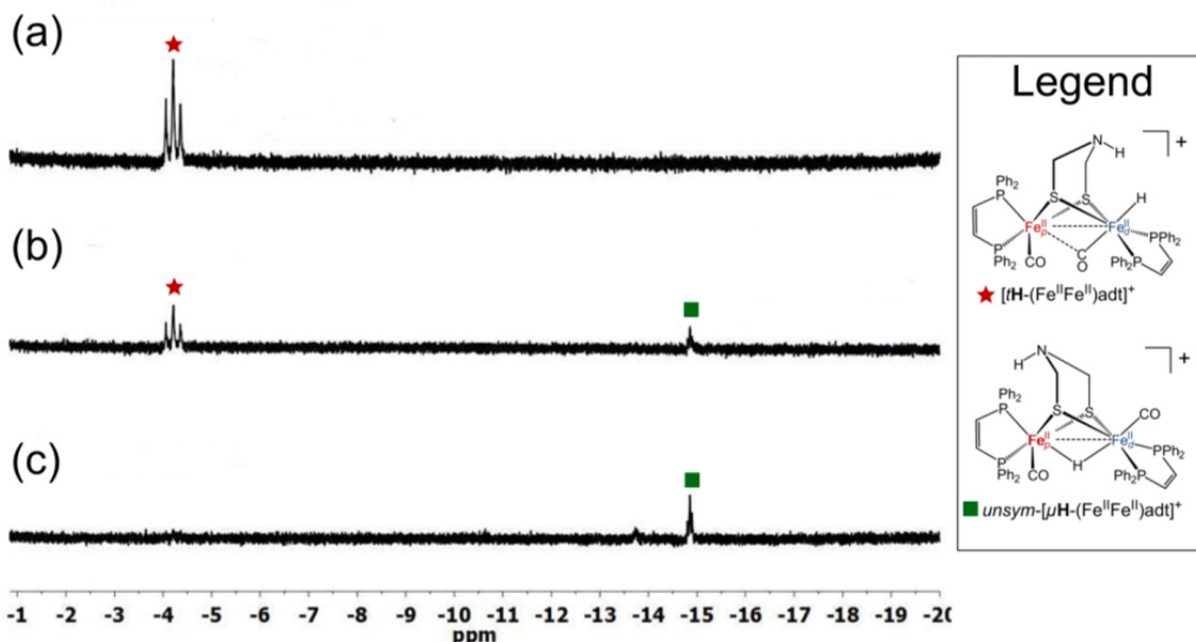

**Figure S4.**  $^1\text{H}$  NMR spectra (at  $-40\text{ }^\circ\text{C}$  in  $\text{CD}_2\text{Cl}_2$  solvent) of  $[(\text{Fe}^{\text{I}}\text{Fe}^{\text{I}})\text{adt}]^0$  species (a) after treatment with 1 equiv of  $[\text{PhNH}_3]\text{BAR}^{\text{F}_4}$  for 30 min. showing exclusive formation of the terminal hydride,  $[\text{tH}-(\text{Fe}^{\text{II}}\text{Fe}^{\text{II}})\text{adt}]^+$  (red stars); (b) after treatment with 2 equiv of  $[\text{PhNH}_3]\text{BAR}^{\text{F}_4}$  for 30 min. showing formation of the terminal hydride,  $[\text{tH}-(\text{Fe}^{\text{II}}\text{Fe}^{\text{II}})\text{adt}]^+$  (red stars), and bridging hydride,  $\text{unsym-}[\mu\text{H}-(\text{Fe}^{\text{II}}\text{Fe}^{\text{II}})\text{adt}]^+$  (green squares); (c) after treatment with 2 equiv of  $[\text{PhNH}_3]\text{BAR}^{\text{F}_4}$  for 90 min. showing exclusive formation of the bridging hydride,  $\text{unsym-}[\mu\text{H}-(\text{Fe}^{\text{II}}\text{Fe}^{\text{II}})\text{adt}]^+$  (green squares). The Fe centers have been labeled  $\text{Fe}_p$  and  $\text{Fe}_d$  for consistency, although this labeling is only chemically meaningful for the terminal hydride species.

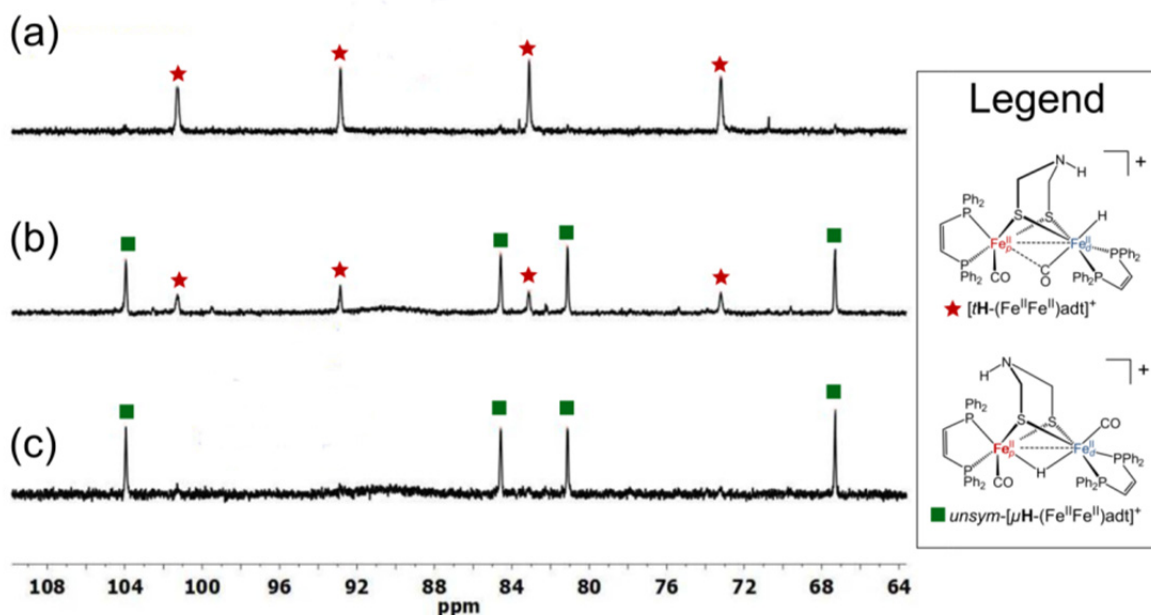

**Figure S5.**  $^{31}\text{P}$  NMR spectra (at  $-40^\circ\text{C}$  in  $\text{CD}_2\text{Cl}_2$  solvent) of  $[(\text{Fe}^{\text{I}}\text{Fe}^{\text{I}})\text{adt}]^0$  species (a) after treatment with 1 equiv of  $[\text{PhNH}_3]\text{BAR}_4^{\text{F}}$  for 30 min. showing exclusive formation of the terminal hydride  $[\text{tH}-(\text{Fe}^{\text{II}}\text{Fe}^{\text{II}})\text{adt}]^+$  (red stars); (b) after treatment with 2 equiv of  $[\text{PhNH}_3]\text{BAR}_4^{\text{F}}$  for 50 minutes showing formation of the terminal hydride,  $[\text{tH}-(\text{Fe}^{\text{II}}\text{Fe}^{\text{II}})\text{adt}]^+$  (red stars), and bridging hydride,  $[\text{unsym}-\mu\text{H}-(\text{Fe}^{\text{II}}\text{Fe}^{\text{II}})\text{adt}]^+$  (green squares); (c) after treatment with 2 equiv of  $[\text{PhNH}_3]\text{BAR}_4^{\text{F}}$  for 90 min. showing exclusive formation of the bridging hydride,  $[\text{unsym}-\mu\text{H}-(\text{Fe}^{\text{II}}\text{Fe}^{\text{II}})\text{adt}]^+$  (green squares). The Fe centers have been labeled  $\text{Fe}_p$  and  $\text{Fe}_d$  for consistency, although this labeling is only chemically meaningful for the terminal hydride species.



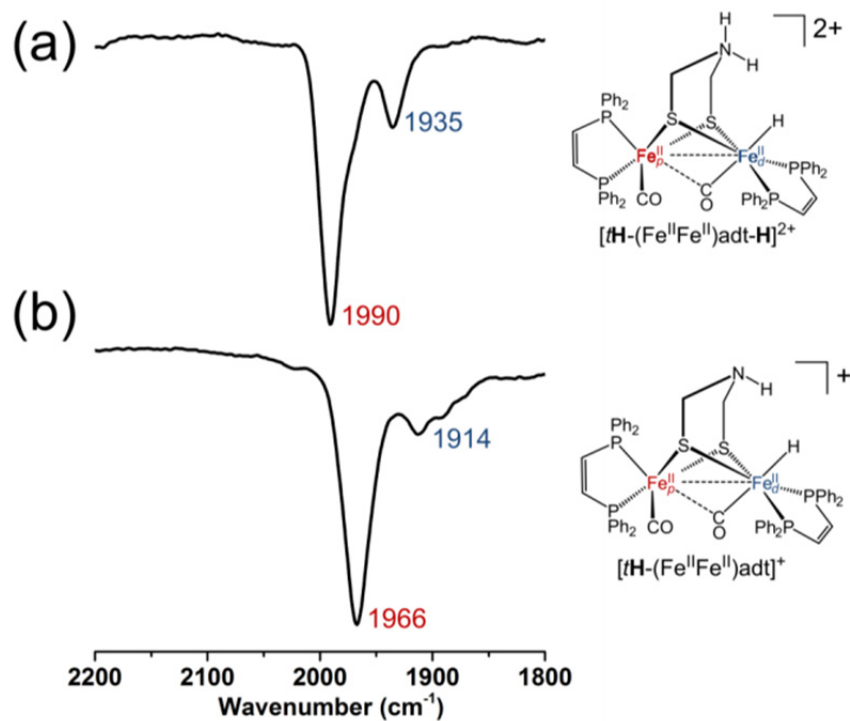

**Figure S6.** FT-IR spectrum (at  $-40^{\circ}\text{C}$  in  $\text{CH}_2\text{Cl}_2$  solvent) of (a) the doubly protonated terminal hydride species,  $[\text{tH}-(\text{Fe}^{\text{II}}\text{Fe}^{\text{II}})\text{adt}-\text{H}](\text{BAR}^{\text{F}}_4)_2$ , showing bands at 1990 (terminal  $\text{Fe}_p\text{CO}$ ) and 1935  $\text{cm}^{-1}$  (semi-bridging  $\text{Fe}_d\text{CO}$ ); and (b) the singly protonated terminal hydride species,  $[\text{tH}-(\text{Fe}^{\text{II}}\text{Fe}^{\text{II}})\text{adt}]\text{BAR}^{\text{F}}_4$ , showing bands at 1966 (terminal  $\text{Fe}_p\text{CO}$ ) and 1914  $\text{cm}^{-1}$  (semi-bridging  $\text{Fe}_d\text{CO}$ ). We had previously shown that the  $\nu_{\text{CO}}$  band assigned to the semibridging  $\text{Fe}_d\text{CO}$  group in  $[\text{tH}-(\text{Fe}^{\text{II}}\text{Fe}^{\text{II}})\text{adt}-\text{H}]^{2+}$  was highly sensitive to the nature of the acid used and anions in  $\text{CH}_2\text{Cl}_2$  solution:  $\nu_{\text{CO}} = 1986$  and  $1950$   $\text{cm}^{-1}$  if using  $\text{CF}_3\text{CO}_2\text{H}$ ;  $\nu_{\text{CO}} = 1986$  and  $1925$   $\text{cm}^{-1}$  if using  $\text{HBF}_4 \cdot \text{Et}_2\text{O}$ .<sup>1</sup>

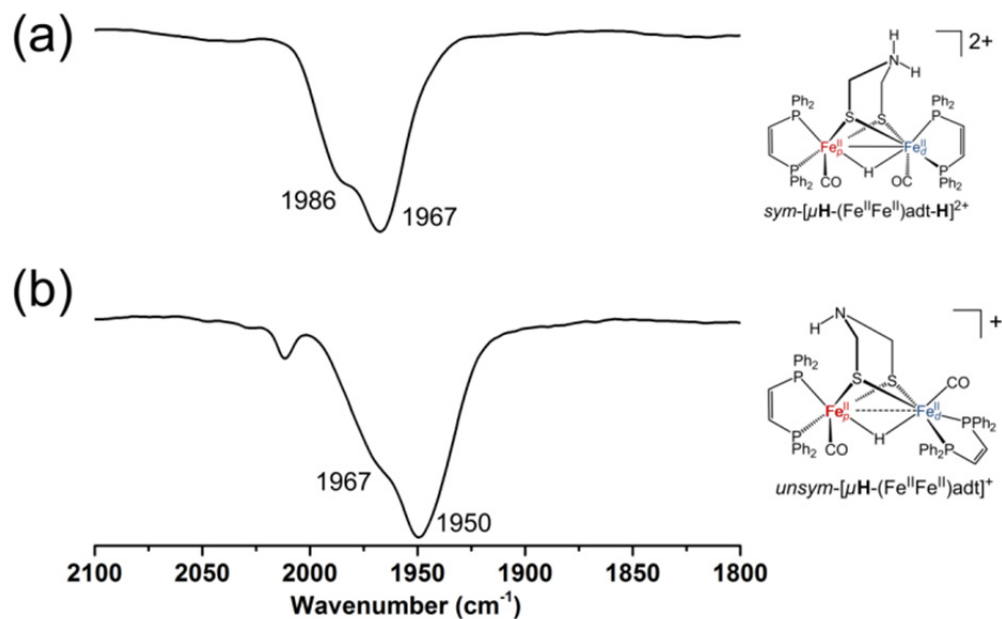

**Figure S7.** FT-IR spectrum (at room temperature in  $\text{CH}_2\text{Cl}_2$  solvent) of (a) the doubly protonated bridging hydride species,  $\text{sym-}[\mu\text{H}-(\text{Fe}^{\text{II}}\text{Fe}^{\text{II}})\text{adt-H}](\text{BARF}_4)_2$ , showing bands at 1986 and 1967  $\text{cm}^{-1}$ ; and (b) the singly protonated bridging hydride species,  $\text{unsym-}[\mu\text{H}-(\text{Fe}^{\text{II}}\text{Fe}^{\text{II}})\text{adt}]\text{BARF}_4$ , showing bands at 1967 and 1950  $\text{cm}^{-1}$ . The  $\nu_{\text{CO}}$  bands are assigned to terminal  $\text{FeCO}$  species in these isomers. The Fe centers have been labeled  $\text{Fe}_p$  and  $\text{Fe}_d$  for consistency, although this labeling is only chemically meaningful for the terminal hydride species.

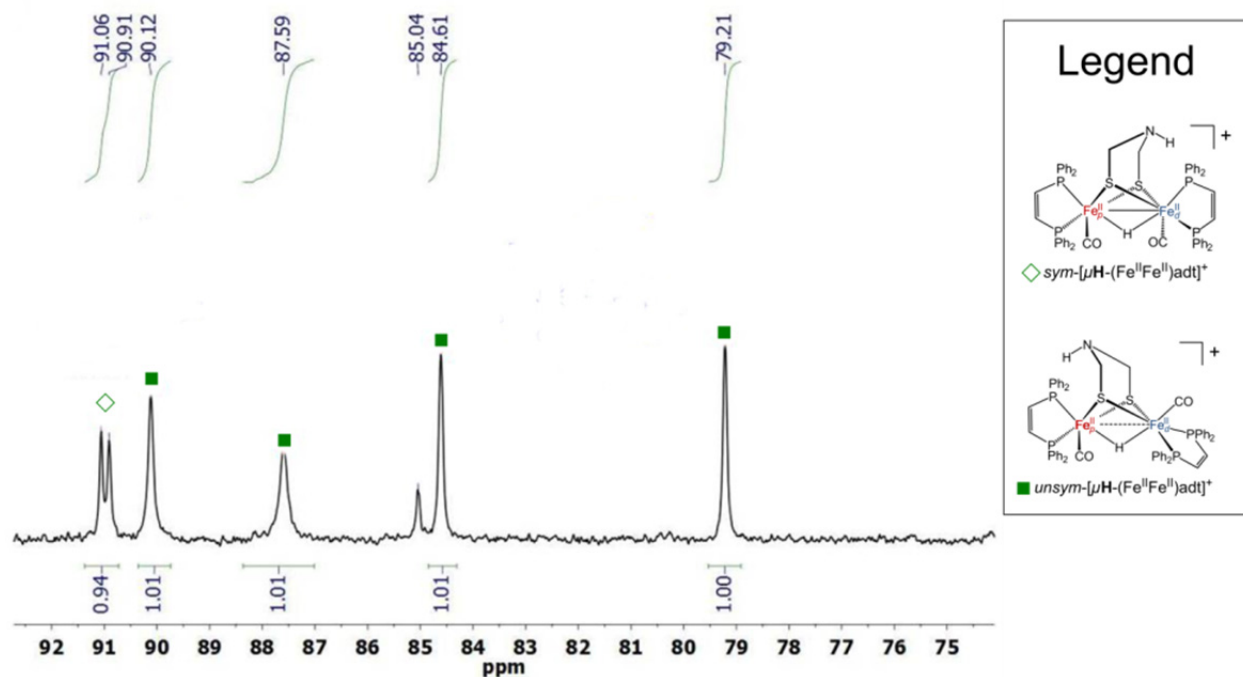

**Figure S8.**  $^{31}\text{P}$  NMR spectrum (in  $\text{CD}_2\text{Cl}_2$  solvent) of the major isomer,  $\text{unsym-}[\mu\text{H}-(\text{Fe}^{\text{II}}\text{Fe}^{\text{II}})\text{adt}]\text{BAR}^{\text{F}_4}$  (green squares), and minor isomer,  $\text{sym-}[\mu\text{H}-(\text{Fe}^{\text{II}}\text{Fe}^{\text{II}})\text{adt}]\text{BAR}^{\text{F}_4}$  (green diamonds), of the singly protonated bridging hydride species. The spectrum was collected after the sample, obtained from the protonation experiment, was equilibrated for ca. 24 hours at room temperature.<sup>1</sup> The Fe centers have been labeled  $\text{Fe}_p$  and  $\text{Fe}_d$  for consistency, although this labeling is only chemically meaningful for the terminal hydride species.

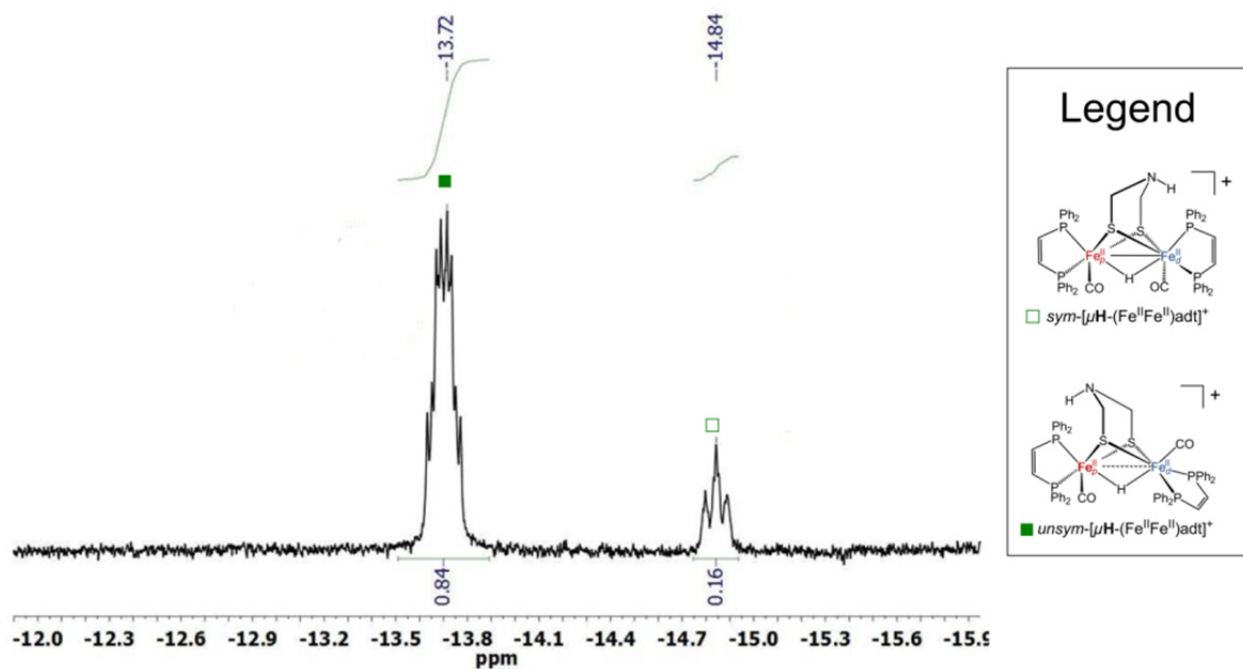

**Figure S9.**  $^1\text{H}$  NMR spectrum (in  $\text{CD}_2\text{Cl}_2$  solvent) of the hydride region of the singly protonated bridging hydride species  $\text{unsym-}[\mu\text{H}-(\text{Fe}^{\text{II}}\text{Fe}^{\text{II}})\text{adt}]\text{BAR}^{\text{F}_4}$  (filled green square) and  $\text{sym-}[\mu\text{H}-(\text{Fe}^{\text{II}}\text{Fe}^{\text{II}})\text{adt}]\text{BAR}^{\text{F}_4}$  (open green square). This is the same sample as shown in **Figure S8**. The Fe centers have been labeled  $\text{Fe}_p$  and  $\text{Fe}_d$  for consistency, although this labeling is only chemically meaningful for the terminal hydride species.

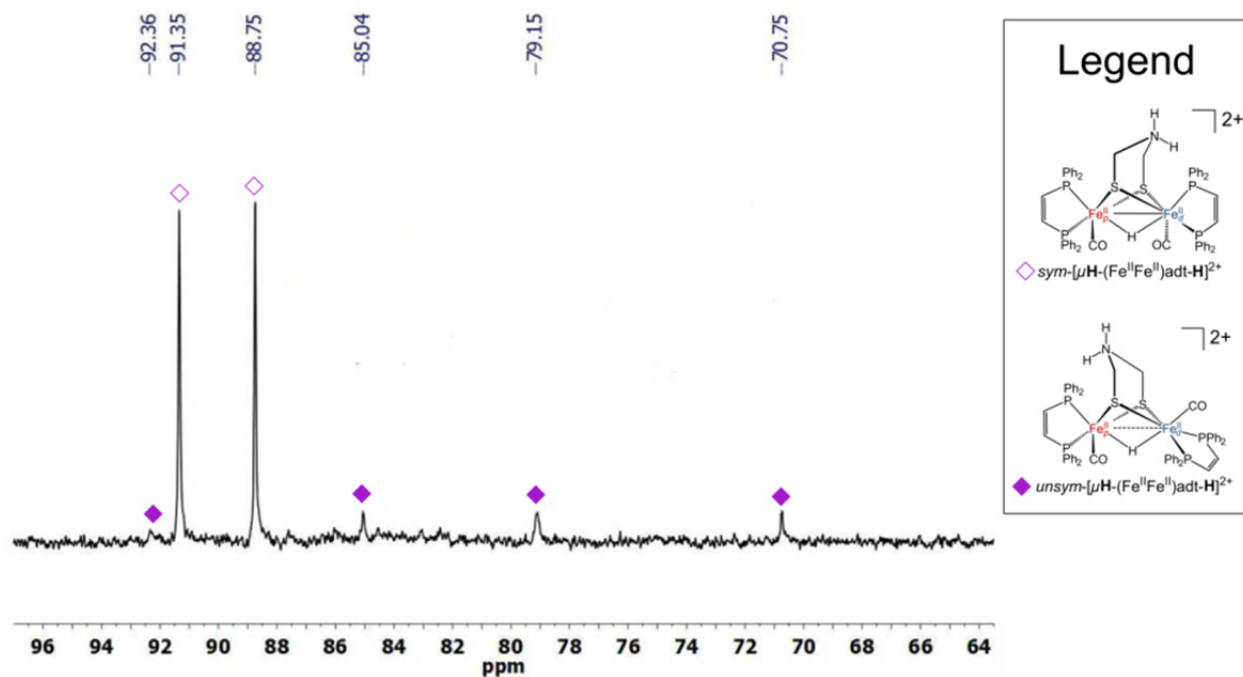

**Figure S10.**  $^{31}\text{P}$  NMR spectrum (in  $\text{CD}_2\text{Cl}_2$  solvent) of the doubly protonated bridging hydride species *unsym*- $[\mu\text{H}-(\text{Fe}^{\text{II}}\text{Fe}^{\text{II}})\text{adt}-\text{H}](\text{BAR}^{\text{F}}_4)_2$  (filled purple diamonds) and *sym*- $[\mu\text{H}-(\text{Fe}^{\text{II}}\text{Fe}^{\text{II}})\text{adt}-\text{H}](\text{BAR}^{\text{F}}_4)_2$  (open purple diamonds). The spectrum was collected after the sample, obtained from the protonation experiment, was equilibrated for ca. 24 hours at room temperature.<sup>1</sup> The Fe centers have been labeled  $\text{Fe}_p$  and  $\text{Fe}_d$  for consistency, although this labeling is only chemically meaningful for the terminal hydride species.

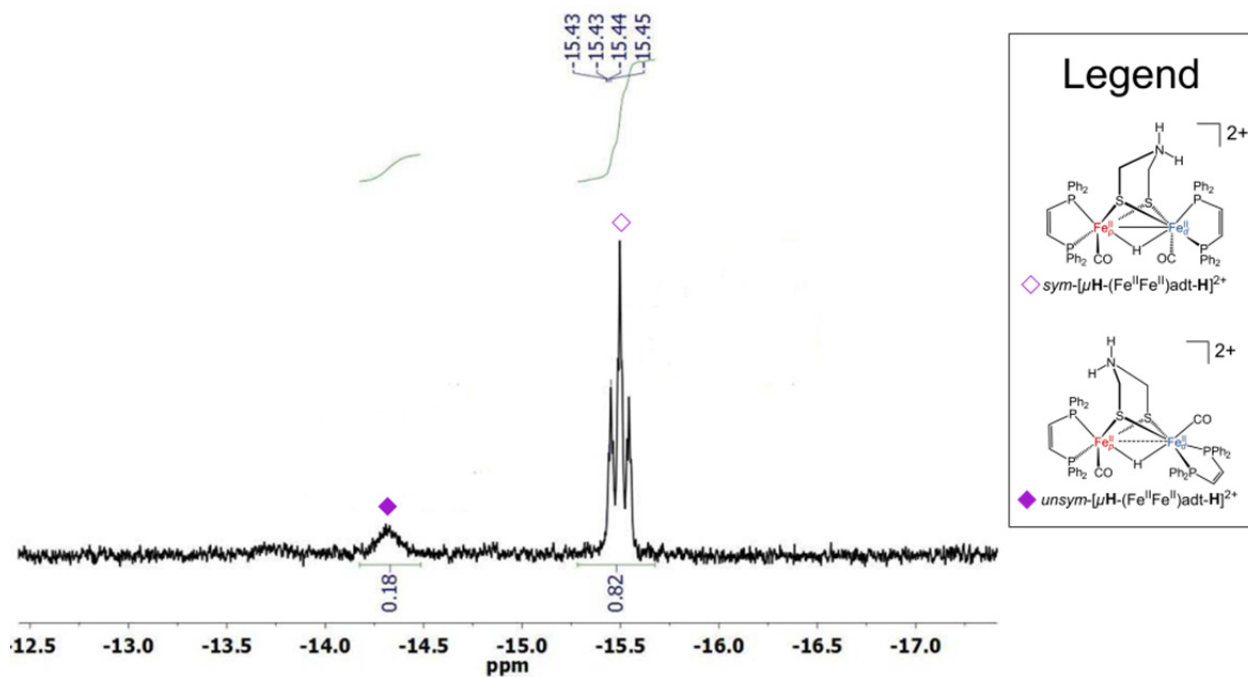

**Figure S11.**  $^1\text{H}$  NMR spectrum (in  $\text{CD}_2\text{Cl}_2$  solvent) of the hydride region of the doubly protonated bridging hydride species  $\text{unsym-}[\mu\text{H}-(\text{Fe}^{\text{II}}\text{Fe}^{\text{II}})\text{adt-H}](\text{BAr}^{\text{F}}_4)_2$  (filled purple diamonds) and  $\text{sym-}[\mu\text{H}-(\text{Fe}^{\text{II}}\text{Fe}^{\text{II}})\text{adt-H}](\text{BAr}^{\text{F}}_4)_2$  (open purple diamonds). This is the same sample as shown in **Figure S10**. The Fe centers have been labeled  $\text{Fe}_p$  and  $\text{Fe}_d$  for consistency, although this labeling is only chemically meaningful for the terminal hydride species.

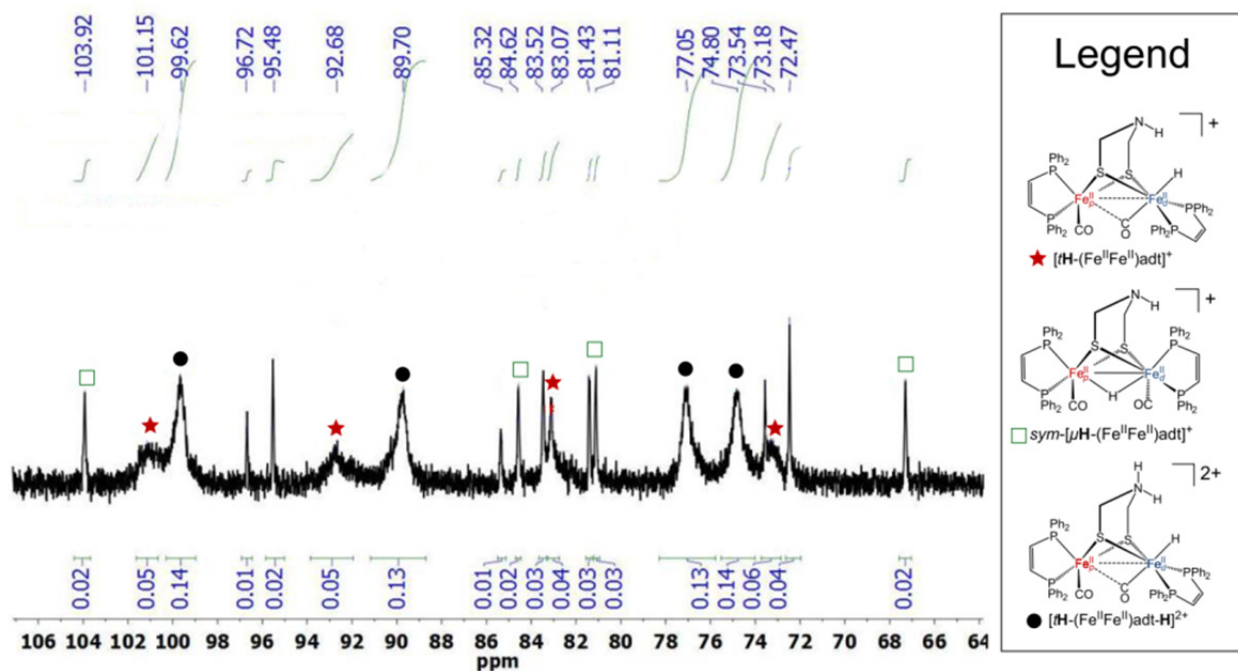

**Figure S12.**  $^{31}\text{P}$  NMR spectrum (at  $-40\text{ }^\circ\text{C}$  in  $\text{CD}_2\text{Cl}_2$  solvent) of  $[(\text{Fe}^{\text{I}}\text{Fe}^{\text{I}})\text{adt}]^0$  after treatment with 2 equiv of  $[\text{Ph}_2\text{NH}_2]\text{BARF}_4$ , showing formation of the single protonated terminal hydride species,  $[t\text{H}-(\text{Fe}^{\text{II}}\text{Fe}^{\text{II}})\text{adt}]^+$  (red stars), the singly protonated bridging hydride species  $\text{sym}-[\mu\text{H}-(\text{Fe}^{\text{II}}\text{Fe}^{\text{II}})\text{adt}]^+$  (open green squares), and the doubly protonated terminal hydride species,  $[t\text{H}-(\text{Fe}^{\text{II}}\text{Fe}^{\text{II}})\text{adt}-\text{H}]^{2+}$  (black circles). About 17% of an unknown species is observed at  $\delta$  96.72, 95.48, 85.32, 83.52, 81.43, and 72.47. The Fe centers have been labeled  $\text{Fe}_p$  and  $\text{Fe}_d$  for consistency, although this labeling is only chemically meaningful for the terminal hydride species.

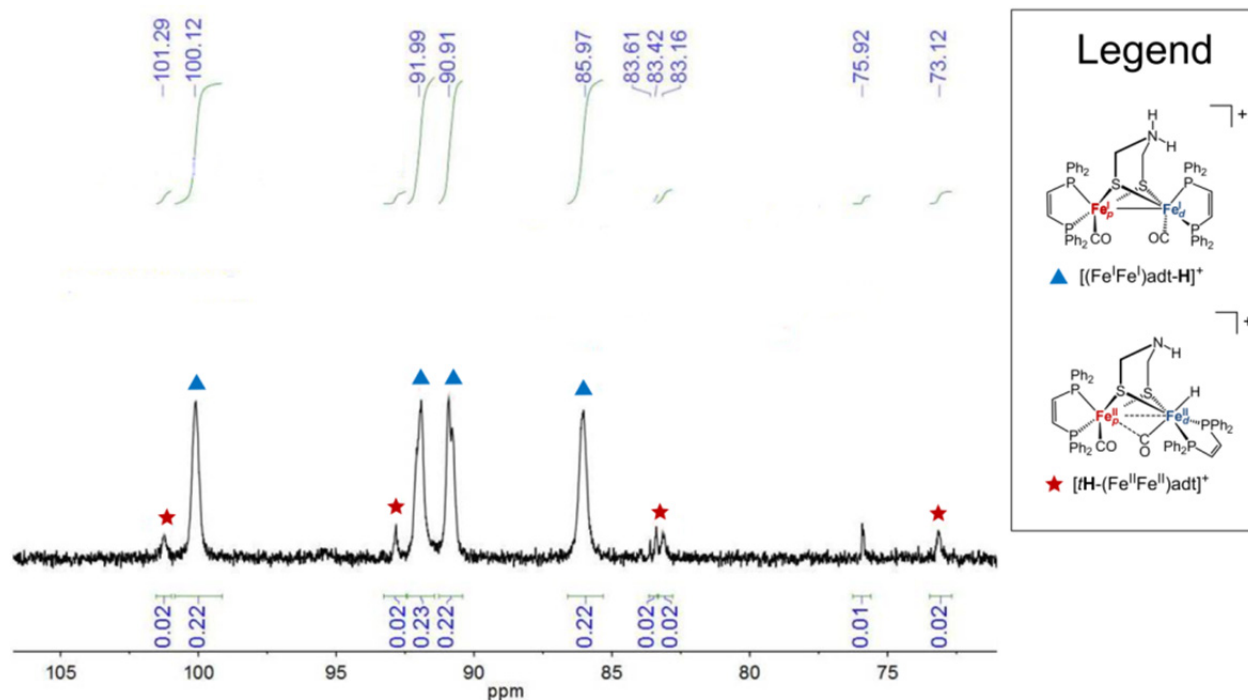

**Figure S13.**  $^{31}\text{P}$  NMR spectrum (at  $-40\text{ }^\circ\text{C}$  in  $\text{CD}_2\text{Cl}_2$  solvent) of  $[(\text{Fe}^{\text{I}}\text{Fe}^{\text{I}})\text{adt}]^0$  after treatment with 1 equiv of  $[\text{Me}_3\text{NH}]\text{BAr}^{\text{F}}_4$ , showing formation of the singly protonated terminal hydride species  $[\text{tH}-(\text{Fe}^{\text{II}}\text{Fe}^{\text{II}})\text{adt}]^+$  (red stars) and its ammonium tautomer  $[(\text{Fe}^{\text{II}}\text{Fe}^{\text{II}})\text{adt}-\text{H}]^+$  (blue triangles). About 3% of an unknown species is observed at  $\delta$  83.61, 83.42, and 75.92. The Fe centers have been labeled  $\text{Fe}_p$  and  $\text{Fe}_d$  for consistency, although this labeling is only chemically meaningful for the terminal hydride species.



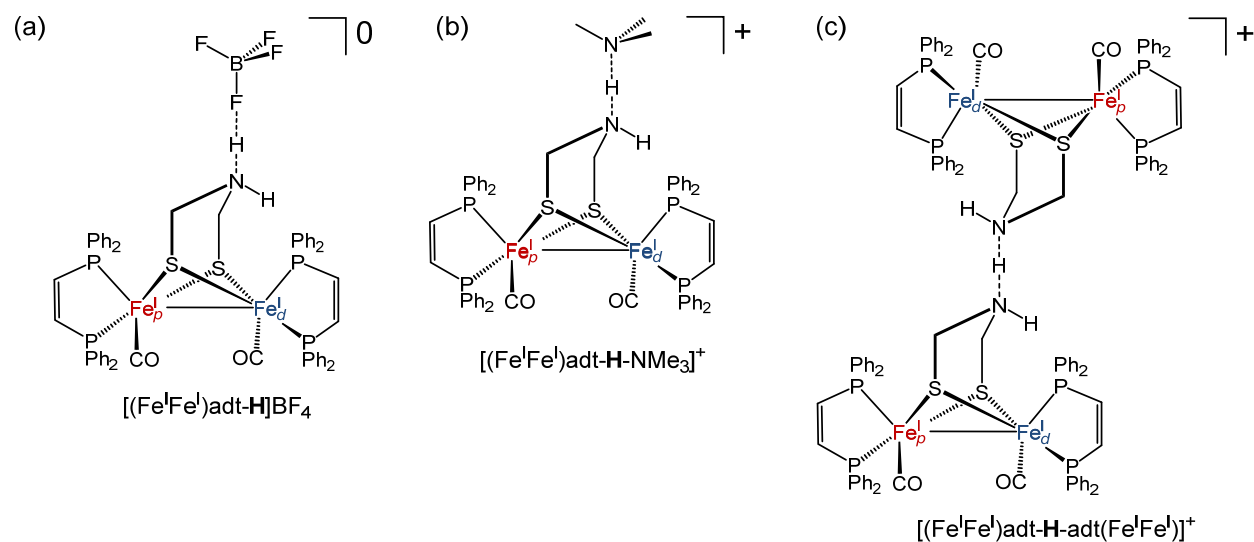

**Figure S14.** (a) The ion-paired product,  $[(\text{Fe}^{\text{I}}\text{Fe}^{\text{I}})\text{adt}\text{-H}]\text{BF}_4$ , arising from the interaction of the ammonium of the  $[(\text{Fe}^{\text{I}}\text{Fe}^{\text{I}})\text{adt}\text{-H}]^+$  species and  $\text{BF}_4^-$  ions. (b) The heteroconjugated product,  $[(\text{Fe}^{\text{I}}\text{Fe}^{\text{I}})\text{adt}\text{-H}\text{-NMe}_3]^+$ , formed upon addition of  $[(\text{Fe}^{\text{I}}\text{Fe}^{\text{I}})\text{adt}]^0$  and  $[\text{Me}_3\text{NH}]\text{BAr}_4^{\text{F}_4}$  (see **Figures S1b, S2, and S13**). (c) The homoconjugated product,  $[(\text{Fe}^{\text{I}}\text{Fe}^{\text{I}})\text{adt}\text{-H}\text{-adt}(\text{Fe}^{\text{I}}\text{Fe}^{\text{I}})]^+$ , formed upon addition of  $[(\text{Fe}^{\text{I}}\text{Fe}^{\text{I}})\text{adt}]^0$  and 0.5 equiv of  $\text{HBAr}_4^{\text{F}_4}$  (see **Figure S3c**). The Fe centers have been labeled  $\text{Fe}_p$  and  $\text{Fe}_d$  for consistency, although this labeling is only chemically meaningful for the terminal hydride species.

## Estimation of $pK_a$ of $[tH-(Fe^II Fe^II)adt]^+$

*Initial Conditions:*

$$[(Fe^I Fe^I)adt]^0_0 = [Me_3NH]BAr_4^F$$

$$[(Fe^I Fe^I)adt]^0_0 = \frac{0.006g / 1068 \frac{g}{mol}}{0.0006L}$$

$$[(Fe^I Fe^I)adt]^0_0 = 0.0093M$$

*Integrated Ratio:* from **Figure S13**

89% for  $[(Fe^I Fe^I)adt-H]^+$  (ammonium tautomer and heteroconjugates)

8% for  $[tH-(Fe^II Fe^II)adt]^+$

~3% for unknown species observed in  $^{31}P$  NMR with integration at  $\delta$  83.61, 83.42, and 75.92

Combining equimolar amounts of  $[Me_3NH]BAr_4^F$  and  $[(Fe^I Fe^I)adt]^0$  gives  $[tH-(Fe^II Fe^II)adt]^+$  in 8% yield, indicating that the  $pK_a$  of  $[tH-(Fe^II Fe^II)adt]^+$  is approximately 2.1  $pK_a$  units less than that of  $[Me_3NH]^+$  ( $pK_a^{CH_3CN} = 17.6^3$ ).

$$\begin{aligned} \log K_a ([tH-(Fe^II Fe^II)adt]^+) &= \log \frac{[(Fe^I Fe^I)adt]^0 [H^+]}{[tH-(Fe^II Fe^II)adt]^+} \\ &= \log \frac{[(Me_3N]^0) [H^+]}{[Me_3NH]^+} + \log \frac{[Me_3NH]^+ [(Fe^I Fe^I)adt]^0}{[(Me_3N]^0) [tH-(Fe^II Fe^II)adt]^+} \\ &= \log K_a ([Me_3NH]^+) + \log \frac{(0.0093 \times 0.89)^2}{(0.0093 \times 0.08)^2} \\ &= -17.6 + \log(123) \end{aligned}$$

$$pK_a ([tH-(Fe^II Fe^II)adt]^+) = 15.5$$

### Estimation of $pK_a$ of $[(Fe^I Fe^I)adt-H]^+$

Since the ammonium tautomer,  $[(Fe^I Fe^I)adt-H]^+$ , cannot be detected in the NMR spectrum (**Figure S1C**) of a solution prepared from treating  $[(Fe^I Fe^I)adt]^0$  with 1 equiv of the strong acid  $[H(OEt_2)_2]BAr^F_4$ , we know that the Fe is at least 20x (conservative NMR detection limits), or 1.3  $pK_a$  units, more basic than the amine.

$$K_a \left( [(Fe^I Fe^I)adt-H]^+ \right) < 20 \times K_a \left( [tH-(Fe^{II} Fe^{II})adt]^+ \right)$$

$$pK_a \left( [(Fe^I Fe^I)adt-H]^+ \right) < 15.5 - 1.3$$

$$pK_a \left( [(Fe^I Fe^I)adt-H]^+ \right) < 14.2$$

## Estimation of $pK_a$ of $[t\mathbf{H}-(\text{Fe}^{\text{II}}\text{Fe}^{\text{II}})\text{adt}-\mathbf{H}]^{2+}$

*Initial Conditions:*

$$\begin{aligned} \left[[(\text{Fe}^{\text{I}}\text{Fe}^{\text{I}})\text{adt}]^0\right]_0 &= \frac{0.006\text{ g} / 1068\text{ g/mol}}{0.0006\text{ L}} \\ \left[[(\text{Fe}^{\text{I}}\text{Fe}^{\text{I}})\text{adt}]^0\right]_0 &= 0.0093\text{ M} \end{aligned}$$

*Integrated Ratio:* from **Figure S12**

54% for  $[t\mathbf{H}-(\text{Fe}^{\text{II}}\text{Fe}^{\text{II}})\text{adt}-\mathbf{H}]^{2+}$   
20% for  $[t\mathbf{H}-(\text{Fe}^{\text{II}}\text{Fe}^{\text{II}})\text{adt}]^+$   
~9% for bridging hydride,  $\text{sym}-[\mu\mathbf{H}-(\text{Fe}^{\text{II}}\text{Fe}^{\text{II}})\text{adt}]^+$   
~17% for unknown species observed in  $^{31}\text{P}$  NMR with integration at  $\delta$  96.72, 95.48, 85.32, 83.52, 81.43, 72.47

Using one or more equiv of  $\text{PhNH}_3^+$  ( $pK_a^{\text{CH}_3\text{CN}} = 10.6^4$ ), which has a low self-association constant) in  $\text{CH}_3\text{CN}$  solution, gave only the singly protonated terminal hydride species,  $[t\mathbf{H}-(\text{Fe}^{\text{II}}\text{Fe}^{\text{II}})\text{adt}]^+$ . The ammonium tautomer,  $[(\text{Fe}^{\text{I}}\text{Fe}^{\text{I}})\text{adt}-\mathbf{H}]^+$ , was not present. The ready formation of the singly protonated terminal hydride species,  $[t\mathbf{H}-(\text{Fe}^{\text{II}}\text{Fe}^{\text{II}})\text{adt}]^+$ , is consistent with its high  $pK_a \sim 15.5$ . The nonobservation of the doubly protonated terminal hydride species,  $[t\mathbf{H}-(\text{Fe}^{\text{II}}\text{Fe}^{\text{II}})\text{adt}-\mathbf{H}]^{2+}$ , is consistent with the second  $pK_a$  being  $<10$ .

The  $pK_a$  of N-protonation of  $[t\mathbf{H}-(\text{Fe}^{\text{II}}\text{Fe}^{\text{II}})\text{adt}]^+$  is indicated by the observation that the doubly protonated species,  $[t\mathbf{H}-(\text{Fe}^{\text{II}}\text{Fe}^{\text{II}})\text{adt}-\mathbf{H}]^{2+}$ , is partially generated upon treatment of  $[(\text{Fe}^{\text{I}}\text{Fe}^{\text{I}})\text{adt}]^0$  with 2 equivalents of  $[\text{Ph}_2\text{NH}_2]\text{BAr}^{\text{F}_4}$  ( $pK_a^{\text{CH}_3\text{CN}} = 5.97^5$ ).

## Computational Details

The details of the methodology are provided in the main text. Unless otherwise noted, all structures were optimized in the gas phase with the B3P86 functional using the SDD pseudopotential and associated basis set for the Fe centers, the 6-31G\*\* basis set for the active hydrogens, and the 6-31G\* basis set for all other atoms. Solvation free energies in dichloromethane ( $\text{CH}_2\text{Cl}_2$ ) were obtained using C-PCM with Bondi atomic radii and including nonelectrostatic contributions of dispersion, repulsion, and cavitation energies. Thermochemical data were calculated at  $T = 298.15$  K unless otherwise noted.

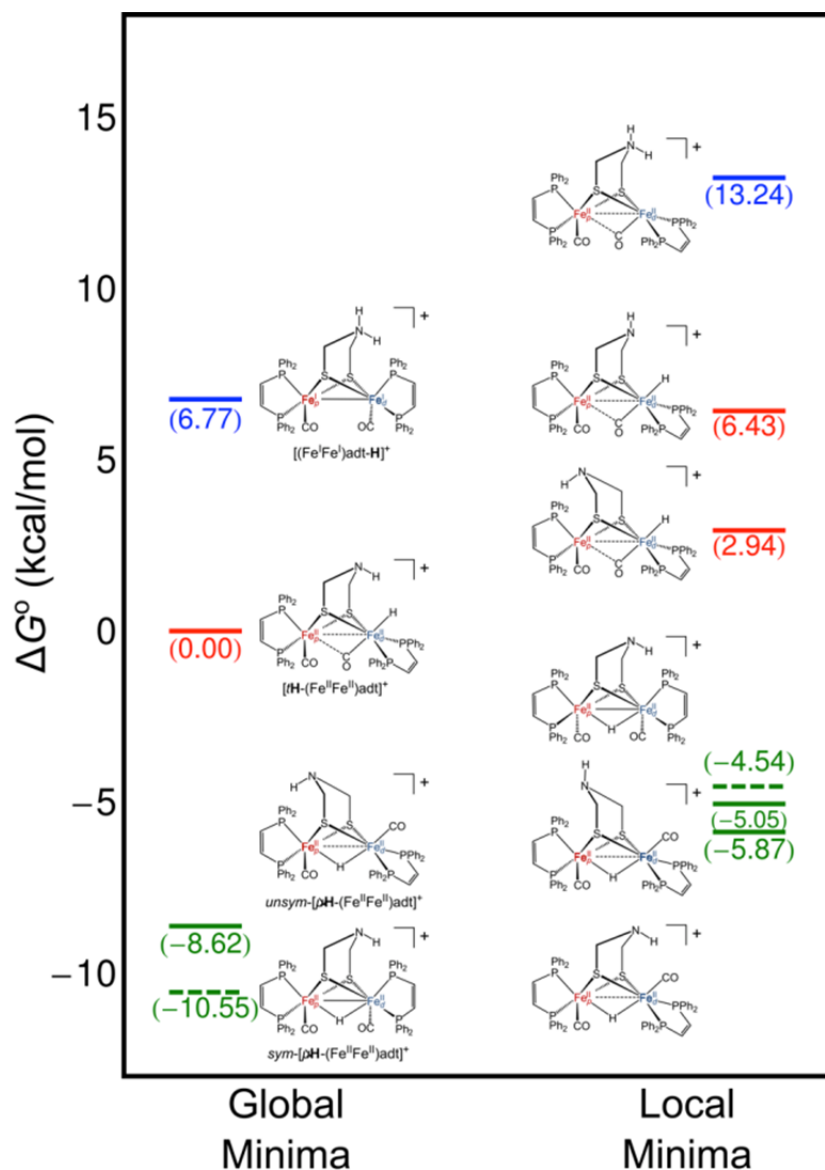

**Figure S15.** Calculated free energies (in kcal/mol) of the singly protonated isomers relative to the terminal hydride species,  $[t\text{H}-(\text{Fe}^{\text{II}}\text{Fe}^{\text{II}})\text{adt}]^+$ . On the left are the lowest energy isomers, which are discussed in the main text; on the right are higher energy isomers. Blue lines refer to the ammonium tautomers, red lines refer to the terminal hydride species, solid green lines refer to the unsymmetric bridging hydrides, and dashed green lines refer to the symmetric bridging hydrides. The local minimum for the symmetric bridging hydride (green dashed lines) differs from the global minimum in terms of the orientation of the dppv ligands. In the global minimum, the dppv ligands are oriented in opposite directions: the  $\text{Fe}_p(\text{dppv})$  tilts inward and the  $\text{Fe}_d(\text{dppv})$  ring tilts outward, giving the molecule pseudo- $C_2$  symmetry if the adt bridge is not considered. In contrast, the local minimum form has both  $\text{Fe}_p(\text{dppv})$  and  $\text{Fe}_d(\text{dppv})$  rings tilting in the same orientation (as depicted, they are both tilting outward), which gives the molecule pseudo- $C_s$  symmetry if the adt bridge is not considered.

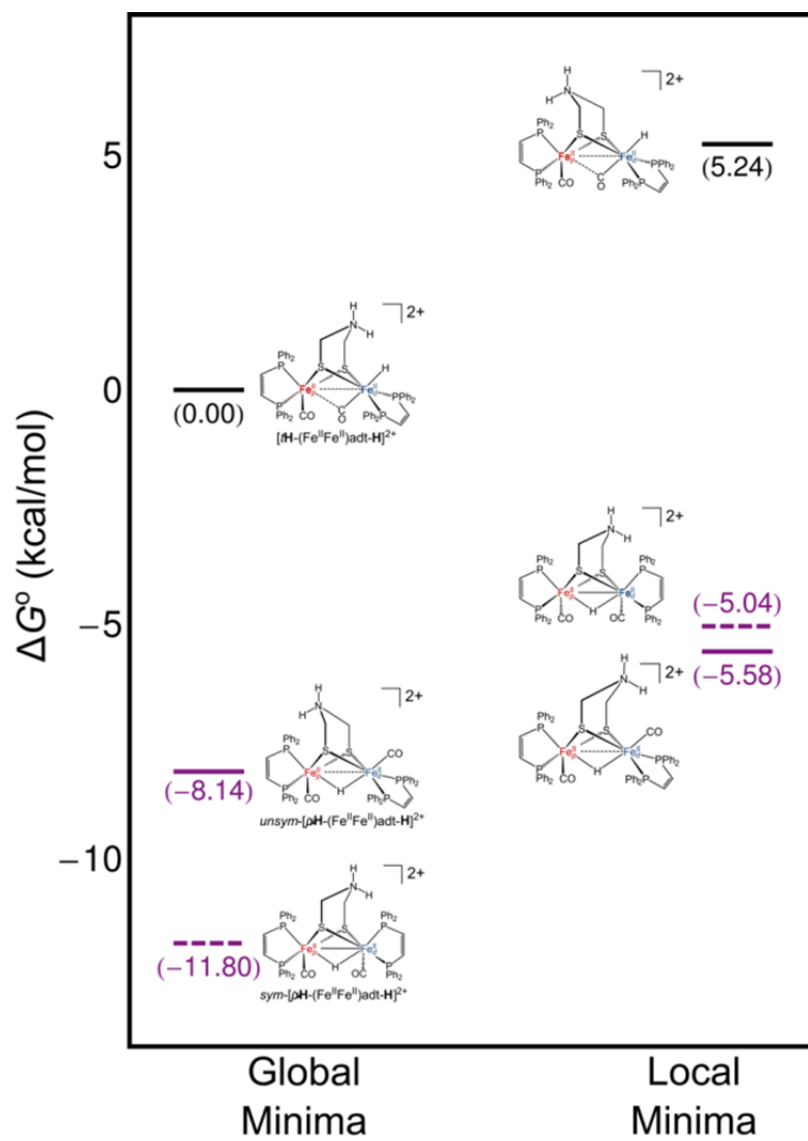

**Figure S16.** Calculated free energies (in kcal/mol) of the doubly protonated isomers relative to the doubly protonated terminal hydride species,  $[t\text{-H}-(\text{Fe}^{\text{II}}\text{Fe}^{\text{II}})\text{adt}-\text{H}]^{2+}$ . On the left are the lowest energy isomers, which are discussed in the main text; on the right are higher energy isomers. Black lines refer to the doubly protonated terminal hydrides species, solid purple lines refer to the unsymmetric bridging hydrides, and dashed purple lines refer to the symmetric bridging hydrides. The local minimum for the symmetric bridging hydride (purple dashed lines) differs from the global minimum in terms of the orientation of the dppv ligands. In the global minimum, the dppv ligands are oriented in opposite directions: the  $\text{Fe}_p(\text{dppv})$  tilts inward and the  $\text{Fe}_d(\text{dppv})$  ring tilts outward, giving the molecule pseudo- $C_2$  symmetry if the adt bridge is not considered. In contrast, the local minimum form has both  $\text{Fe}_p(\text{dppv})$  and  $\text{Fe}_d(\text{dppv})$  rings tilting in the same orientation (as depicted, they are both tilting outward), which gives the molecule pseudo- $C_s$  symmetry if the adt bridge is not considered.

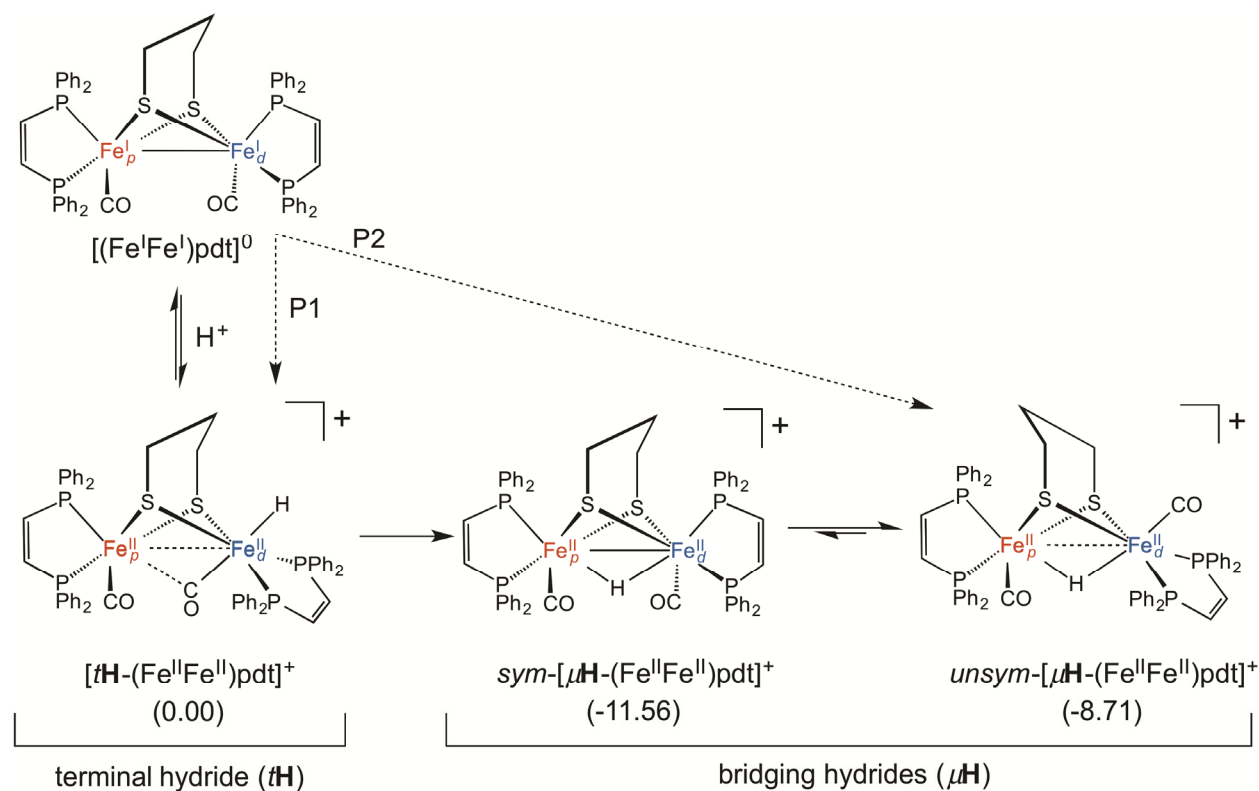

### Figure S17: Relative Free Energies of [(FeFe)pdt] Species

Schematic depiction of the various protonated states of the [(FeFe)pdt] species, where each row represents a protonation state of the catalyst. The free energies are provided for the singly protonated states in kcal/mol relative to the terminal hydride species,  $[\text{tH}-(\text{Fe}^{\text{II}}\text{Fe}^{\text{II}})\text{pdt}]^+$ . The dashed lines (P1 and P2) correspond to pathways for which structural and/or electronic changes can be monitored by  $\Delta\nu_{\text{CO}}$  values; they do not necessarily correspond to reaction pathways. The  $\Delta\nu_{\text{CO}}$  values are given in Table S1.

**Table S1: Experimental and Calculated  $\Delta\nu_{\text{CO}}$  Values<sup>a</sup> upon Protonation of the [(FeFe)pdt] Species<sup>b,c</sup>**

|                 | expt <sup>d</sup> | calc <sup>e</sup> |
|-----------------|-------------------|-------------------|
| P1 <sup>f</sup> | 77, 37            | 87, 42            |
| P2              | 83, 80            | 90, 77            |

<sup>a</sup>Values given in  $\text{cm}^{-1}$ . <sup>b</sup>All geometries were optimized in the gas phase using the B3P86 functional with the SDD pseudopotential and associated basis set for the Fe centers, the 6-31G\*\* basis set for the active hydrogen, and the 6-31G\* basis set for all other atoms. <sup>c</sup>The P1 and P2 protonation reactions are defined in Figure S17. <sup>d</sup>Experimental data from ref 1. <sup>e</sup>Frequencies scaled by a factor of 0.9850. <sup>f</sup>The smaller  $\Delta\nu_{\text{CO}}$  value is assigned to the semibridging CO.



**Table S2: Comparison of Structures Optimized in the Gas Phase and Solution Phase<sup>a</sup>**

| species                                                      |                        | Fe <sub>p</sub> ···Fe <sub>d</sub> | Fe <sub>p</sub> ···CO | Fe <sub>d</sub> ···CO | Fe <sub>d</sub> ···H |
|--------------------------------------------------------------|------------------------|------------------------------------|-----------------------|-----------------------|----------------------|
| [(Fe <sup>I</sup> Fe <sup>I</sup> )adt] <sup>0</sup>         | expt <sup>b</sup>      | 2.60                               | 1.74                  | 1.75                  |                      |
|                                                              | gas-opt <sup>c</sup>   | 2.53                               | 1.73                  | 1.73                  | n/a                  |
|                                                              | sol-opt <sup>c,d</sup> | 2.54                               | 1.72                  | 1.72                  |                      |
| [tH-(Fe <sup>II</sup> Fe <sup>II</sup> )adt-H] <sup>2+</sup> | expt <sup>b</sup>      | 2.62                               | 1.77                  | 1.79                  | 1.44                 |
|                                                              | gas-opt <sup>c</sup>   | 2.65                               | 1.77                  | 1.78                  | 1.53                 |
|                                                              | sol-opt <sup>c,d</sup> | 2.61                               | 1.76                  | 1.77                  | 1.51                 |

<sup>a</sup>Values given in Å. <sup>b</sup>Experimental data from ref 1. <sup>c</sup>Geometries were optimized using the B3P86 functional with the SDD pseudopotential and associated basis set for the Fe centers, the 6-31G\*\* basis set for the active hydrogen, and the 6-31G\* basis set for all other atoms. <sup>d</sup>Geometries optimized in CH<sub>2</sub>Cl<sub>2</sub> solvent using C-PCM.

**Table S3: Bond Lengths<sup>a</sup> for the Doubly Protonated [(FeFe)adt] Species using Various Functionals<sup>b</sup>**

|                   | Fe <sub>p</sub> ···Fe <sub>d</sub> | Fe <sub>d</sub> ···H | H···H |
|-------------------|------------------------------------|----------------------|-------|
| Expt <sup>c</sup> | 2.62                               | 1.44                 | 1.88  |
| B3P86             | 2.65                               | 1.53                 | 1.40  |
| M06-L             | 2.61                               | 1.55                 | 1.49  |
| TPSSh             | 2.64                               | 1.54                 | 1.43  |
| B3LYP             | 2.75                               | 1.54                 | 1.40  |
| ωB97XD            | 2.65                               | 1.52                 | 1.43  |

<sup>a</sup>Values given in Å. <sup>b</sup>All geometry optimizations were performed in the gas phase. <sup>c</sup>Experimental data from ref 1.

**Table S4: Experimental and Calculated Absolute ν<sub>CO</sub> Values<sup>a</sup>**

| species                                                                    | ν <sub>CO</sub> (expt) <sup>b</sup> | ν <sub>CO</sub> (calc) <sup>c,d</sup> |
|----------------------------------------------------------------------------|-------------------------------------|---------------------------------------|
| [(Fe <sup>I</sup> Fe <sup>I</sup> )adt] <sup>0</sup>                       | 1868, 1888                          | 1942, 1964                            |
| [(Fe <sup>II</sup> Fe <sup>II</sup> )adt-H] <sup>+</sup>                   | 1890, 1910                          | 1973, 1995                            |
| [tH-(Fe <sup>II</sup> Fe <sup>II</sup> )adt] <sup>+</sup>                  | 1914, 1966                          | 1979, 2050                            |
| <i>sym</i> -[μH-(Fe <sup>II</sup> Fe <sup>II</sup> )adt] <sup>+</sup>      | n/a <sup>e</sup>                    | 2031, 2040                            |
| <i>unsym</i> -[μH-(Fe <sup>II</sup> Fe <sup>II</sup> )adt] <sup>+</sup>    | 1950, 1967                          | 2031, 2041                            |
| [tH-(Fe <sup>II</sup> Fe <sup>II</sup> )adt-H] <sup>2+</sup>               | 1935, 1990                          | 2013, 2077                            |
| <i>sym</i> -[μH-(Fe <sup>II</sup> Fe <sup>II</sup> )adt-H] <sup>2+</sup>   | 1967, 1986                          | 2060, 2071                            |
| <i>unsym</i> -[μH-(Fe <sup>II</sup> Fe <sup>II</sup> )adt-H] <sup>2+</sup> | n/a <sup>e</sup>                    | 1991, 2068                            |
| [(Fe <sup>I</sup> Fe <sup>I</sup> )pdt] <sup>0</sup>                       | 1868, 1888                          | 1941, 1964                            |
| [tH-(Fe <sup>II</sup> Fe <sup>II</sup> )pdt] <sup>+</sup>                  | 1905, 1965                          | 1983, 2051                            |
| <i>sym</i> -[μH-(Fe <sup>II</sup> Fe <sup>II</sup> )adt] <sup>+</sup>      | n/a <sup>e</sup>                    | 2030, 2039                            |
| <i>unsym</i> -[μH-(Fe <sup>II</sup> Fe <sup>II</sup> )adt] <sup>+</sup>    | 1951, 1968                          | 2032, 2041                            |

<sup>a</sup>Values given in cm<sup>-1</sup>. <sup>b</sup>Experimental data from ref 1. <sup>c</sup>Geometries were optimized using the B3P86 functional with the SDD pseudopotential and associated basis set for the Fe centers, the 6-31G\*\* basis set for the active hydrogen, and the 6-31G\* basis set for all other atoms. <sup>d</sup>Frequencies scaled by a factor of 0.9850. <sup>e</sup>These isomers were observed using NMR spectroscopy but were not observed using IR spectroscopy.

**Table S5: Experimental and Calculated Reduction Potentials<sup>a,b</sup>**

| species                                                        |                   | $E^\circ$ [(FeFe)] <sup>0/-</sup> | $E^\circ$ [ <i>t</i> H-(FeFe)] <sup>+/0</sup> | $E^\circ$ [ $\mu$ H-(FeFe)] <sup>+/0</sup> |
|----------------------------------------------------------------|-------------------|-----------------------------------|-----------------------------------------------|--------------------------------------------|
| [(FeFe)pdt]                                                    | expt <sup>c</sup> | n/a                               | -1.70 <sup>e</sup>                            | -1.80                                      |
|                                                                | calc <sup>d</sup> |                                   | -1.70                                         | -1.80                                      |
| [(FeFe)adt]                                                    | expt <sup>f</sup> | n/a                               | -1.63 <sup>g</sup>                            | -1.79                                      |
|                                                                | calc              |                                   | -1.66                                         | -1.77                                      |
| [(FeFe)pdt(CO) <sub>3</sub> (PMe <sub>3</sub> )(dppv)]         | expt <sup>i</sup> | n/a                               | n/a                                           | -1.68                                      |
|                                                                | calc              |                                   |                                               | -1.62                                      |
| [(FeFe)pdt(CO) <sub>6</sub> ]                                  | expt <sup>h</sup> | -1.65                             | n/a                                           | n/a                                        |
|                                                                | calc <sup>d</sup> | -1.65                             |                                               |                                            |
| [(FeFe)pdt(CO) <sub>4</sub> (dppv)]                            | expt <sup>i</sup> | -2.09                             | n/a                                           | -1.27                                      |
|                                                                | calc              | -2.13                             |                                               | -1.33                                      |
| [(FeFe)pdt(CO) <sub>4</sub> (PMe <sub>3</sub> ) <sub>2</sub> ] | expt <sup>i</sup> | -2.63                             | n/a                                           | -1.52                                      |
|                                                                | calc              | -2.34                             |                                               | -1.40                                      |

<sup>a</sup>Values given in Volts vs Fc<sup>0</sup>/Fc<sup>+</sup> in dichloromethane (CH<sub>2</sub>Cl<sub>2</sub>) solvent. <sup>b</sup>All geometries were optimized in the gas phase using the B3P86 functional with the SDD pseudopotential and associated basis set for the Fe centers, the 6-31G\*\* basis set for the active hydrogen, and the 6-31G\* basis set for all other atoms. <sup>c</sup>Experimental data from ref 7. <sup>d</sup>These reactions were used as the reference reactions, so the calculated and experimental values agree by construction. <sup>e</sup>Quasi-reversible reaction so  $E_p$  is reported. <sup>f</sup>Experimental data from ref 1. <sup>g</sup>Irreversible reaction, so  $E_p$  reported. <sup>h</sup>Experimental data from ref 8. <sup>i</sup>Experimental data from ref 2.

**Table S6: Spin Densities and Bond Lengths<sup>a</sup> of Oxidized and Reduced Mixed-Valence [(FeFe)pdt] Species<sup>b</sup>**

| Oxidized                                                                      |                     |                     |                                    |                      |                      |
|-------------------------------------------------------------------------------|---------------------|---------------------|------------------------------------|----------------------|----------------------|
| species                                                                       | $\rho(\text{Fe}_p)$ | $\rho(\text{Fe}_d)$ | Fe <sub>p</sub> ···Fe <sub>d</sub> | Fe <sub>p</sub> ···H | Fe <sub>d</sub> ···H |
| [(Fe <sup>II</sup> Fe <sup>II</sup> )pdt] <sup>0</sup>                        | 0.00                | 0.00                | 2.53                               | n/a                  | n/a                  |
| [ <i>t</i> H-(Fe <sup>II</sup> Fe <sup>II</sup> )pdt] <sup>+</sup>            | 0.00                | 0.00                | 2.59                               | n/a                  | 1.50                 |
| <i>sym</i> -[ $\mu$ H-(Fe <sup>II</sup> Fe <sup>II</sup> )pdt] <sup>+</sup>   | 0.00                | 0.00                | 2.61                               | 1.65                 | 1.64                 |
| <i>unsym</i> -[ $\mu$ H-(Fe <sup>II</sup> Fe <sup>II</sup> )pdt] <sup>+</sup> | 0.00                | 0.00                | 2.66                               | 1.68                 | 1.71                 |
| Reduced                                                                       |                     |                     |                                    |                      |                      |
| species                                                                       | $\rho(\text{Fe}_p)$ | $\rho(\text{Fe}_d)$ | Fe <sub>p</sub> ···Fe <sub>d</sub> | Fe <sub>p</sub> ···H | Fe <sub>d</sub> ···H |
| [(Fe <sup>I</sup> Fe <sup>I</sup> )pdt] <sup>+</sup>                          | 0.03                | 1.11                | 2.59                               | n/a                  | n/a                  |
| [ <i>t</i> H-(Fe <sup>I</sup> Fe <sup>II</sup> )pdt] <sup>0</sup>             | 1.02                | 0.07                | 2.94                               | n/a                  | 1.52                 |
| <i>sym</i> -[ $\mu$ H-(Fe <sup>1.5</sup> Fe <sup>1.5</sup> )pdt] <sup>0</sup> | 0.78                | 0.37                | 2.74                               | 1.76                 | 1.59                 |
| <i>unsym</i> -[ $\mu$ H-(Fe <sup>I</sup> Fe <sup>II</sup> )pdt] <sup>0</sup>  | 0.96                | 0.18                | 2.85                               | 2.01                 | 1.59                 |

<sup>a</sup>Values given in Å. <sup>b</sup>All geometries were optimized in the gas phase using the B3P86 functional with the SDD pseudopotential and associated basis set for the Fe centers, the 6-31G\*\* basis set for the active hydrogen, and the 6-31G\* basis set for all other atoms.

**Table S7: Spin Densities and Bond Lengths<sup>a</sup> for the Reduced Mixed-Valence Bridging Hydride Forms of the [(FeFe)pdt] Species using the BP86 Functional and Various Basis Sets**

| Basis Set: SDD (Fe) / 6-31G** ( $\mu\text{H}$ ) / 6-31G* (all other atoms)               |                     |                     |                                  |                               |                               |
|------------------------------------------------------------------------------------------|---------------------|---------------------|----------------------------------|-------------------------------|-------------------------------|
| species                                                                                  | $\rho(\text{Fe}_p)$ | $\rho(\text{Fe}_d)$ | $\text{Fe}_p \cdots \text{Fe}_d$ | $\text{Fe}_p \cdots \text{H}$ | $\text{Fe}_d \cdots \text{H}$ |
| <i>sym</i> - $[\mu\text{H}-(\text{Fe}^{1.5}\text{Fe}^{1.5})\text{pdt}]^0$                | 0.47                | 0.36                | 2.75                             | 1.70                          | 1.67                          |
| <i>unsym</i> - $[\mu\text{H}-(\text{Fe}^{\text{I}}\text{Fe}^{\text{II}})\text{pdt}]^0$   | 0.57                | 0.31                | 2.81                             | 1.76                          | 1.71                          |
| Basis Set: SDD (Fe) / D95* (all other atoms)                                             |                     |                     |                                  |                               |                               |
| species                                                                                  | $\rho(\text{Fe}_p)$ | $\rho(\text{Fe}_d)$ | $\text{Fe}_p \cdots \text{Fe}_d$ | $\text{Fe}_p \cdots \text{H}$ | $\text{Fe}_d \cdots \text{H}$ |
| <i>sym</i> - $[\mu\text{H}-(\text{Fe}^{1.5}\text{Fe}^{1.5})\text{pdt}]^0$                | 0.51                | 0.42                | 2.75                             | 1.71                          | 1.67                          |
| <i>unsym</i> - $[\mu\text{H}-(\text{Fe}^{\text{I}}\text{Fe}^{\text{II}})\text{pdt}]^0$   | 0.64                | 0.32                | 2.81                             | 1.79                          | 1.70                          |
| Basis Set: TZVP <sup>b</sup> (Fe) / 6-31G** ( $\mu\text{H}$ ) / 6-31G* (all other atoms) |                     |                     |                                  |                               |                               |
| species                                                                                  | $\rho(\text{Fe}_p)$ | $\rho(\text{Fe}_d)$ | $\text{Fe}_p \cdots \text{Fe}_d$ | $\text{Fe}_p \cdots \text{H}$ | $\text{Fe}_d \cdots \text{H}$ |
| <i>sym</i> - $[\mu\text{H}-(\text{Fe}^{1.5}\text{Fe}^{1.5})\text{pdt}]^0$                | 0.47                | 0.39                | 2.75                             | 1.70                          | 1.67                          |
| <i>unsym</i> - $[\mu\text{H}-(\text{Fe}^{\text{I}}\text{Fe}^{\text{II}})\text{pdt}]^0$   | 0.56                | 0.31                | 2.81                             | 1.76                          | 1.71                          |
| Basis Set: TZVP <sup>b</sup> (Fe) / D95* (all other atoms)                               |                     |                     |                                  |                               |                               |
| species                                                                                  | $\rho(\text{Fe}_p)$ | $\rho(\text{Fe}_d)$ | $\text{Fe}_p \cdots \text{Fe}_d$ | $\text{Fe}_p \cdots \text{H}$ | $\text{Fe}_d \cdots \text{H}$ |
| <i>sym</i> - $[\mu\text{H}-(\text{Fe}^{1.5}\text{Fe}^{1.5})\text{pdt}]^0$                | 0.47                | 0.39                | 2.75                             | 1.70                          | 1.67                          |
| <i>unsym</i> - $[\mu\text{H}-(\text{Fe}^{\text{I}}\text{Fe}^{\text{II}})\text{pdt}]^0$   | 0.57                | 0.31                | 2.81                             | 1.76                          | 1.71                          |

<sup>a</sup>Values given in Å. <sup>b</sup>No pseudopotential was used for the TZVP basis set on the Fe center.

**Table S8. Experimental and Calculated  $\Delta\text{p}K_a$  Values<sup>a</sup> of the [(FeFe)adt] Species using Different Functionals**

|                               | expt <sup>b</sup> | calc <sup>c</sup> |      |      |      |       |      |                      |      |
|-------------------------------|-------------------|-------------------|------|------|------|-------|------|----------------------|------|
|                               |                   | B3P86             |      | BP86 |      | M06-L |      | $\omega\text{B97XD}$ |      |
|                               |                   | 233K              | 298K | 233K | 298K | 233K  | 298K | 233K                 | 298K |
| $\Delta\text{p}K_a$ (P2 – P1) | >1.3              | 6                 | 5    | 5    | 4    | 8     | 6    | 4                    | 3    |
| $\Delta\text{p}K_a$ (P4 – P2) | -9.5              | -18               | -14  | -16  | -13  | -19   | -15  | -10                  | -8   |
| $\Delta\text{p}K_a$ (P3 – P2) | >2.0              | 8                 | 6    | 4    | 3    | 8     | 6    | 20                   | 15   |

<sup>a</sup>The protonation pathways P1, P2, P3, and P4 are defined in Figure 3 in the main paper, and the  $\text{p}K_a$  is determined for the protonated species in each case. <sup>b</sup>These experiments were performed in  $\text{CH}_2\text{Cl}_2$  solvent, but the reference  $\text{p}K_a$  values pertain to  $\text{CH}_3\text{CN}$  solvent. <sup>c</sup>The values were calculated in  $\text{CH}_2\text{Cl}_2$  solvent.

**Table S9:** Cartesian coordinates of the optimized structure of  $[(\text{Fe}^{\text{I}}\text{Fe}^{\text{I}})\text{pdt}]^0$   
 ( $-4772.17273608 E_h$ )

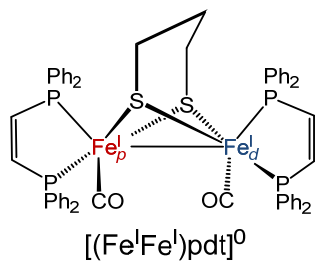

| atom | x         | y         | z         |
|------|-----------|-----------|-----------|
| Fe   | 5.253654  | 4.186127  | 4.516163  |
| Fe   | 5.000536  | 6.255282  | 5.953701  |
| S    | 6.998949  | 5.193392  | 5.567261  |
| S    | 4.875367  | 6.275426  | 3.677138  |
| P    | 5.936775  | 3.123960  | 2.722515  |
| P    | 5.588014  | 2.277931  | 5.654418  |
| P    | 5.568139  | 8.214309  | 6.791629  |
| P    | 2.859831  | 6.910070  | 6.190059  |
| O    | 2.446414  | 3.560006  | 4.167961  |
| O    | 4.866415  | 4.843985  | 8.478321  |
| C    | 7.546086  | 7.270461  | 3.676303  |
| H    | 7.253686  | 8.063670  | 4.368032  |
| C    | 4.916876  | 3.138966  | 1.184753  |
| C    | 3.904593  | 4.088918  | 1.021854  |
| H    | 3.743648  | 4.833002  | 1.796373  |
| C    | 3.121160  | 4.096191  | -0.131695 |
| H    | 2.341572  | 4.844460  | -0.244948 |
| C    | 3.333722  | 3.152365  | -1.131185 |
| H    | 2.718436  | 3.155797  | -2.026839 |
| C    | 4.344369  | 2.203235  | -0.981824 |
| H    | 4.521581  | 1.466463  | -1.760641 |
| C    | 5.131792  | 2.200268  | 0.164468  |
| H    | 5.932183  | 1.470517  | 0.253378  |
| C    | 7.638328  | 3.330396  | 2.026422  |
| C    | 8.734378  | 2.970713  | 2.822166  |
| H    | 8.568343  | 2.566871  | 3.817026  |
| C    | 10.035713 | 3.153525  | 2.365076  |
| H    | 10.872127 | 2.863810  | 2.995312  |
| C    | 10.265072 | 3.717927  | 1.110940  |
| H    | 11.281079 | 3.866079  | 0.755720  |
| C    | 9.184039  | 4.096262  | 0.320054  |
| H    | 9.352039  | 4.542658  | -0.656410 |
| C    | 7.879458  | 3.901046  | 0.771506  |
| H    | 7.046162  | 4.188761  | 0.137588  |
| C    | 5.942013  | 1.328653  | 3.110120  |
| H    | 6.073834  | 0.589486  | 2.321024  |
| C    | 5.769074  | 0.963302  | 4.383063  |
| H    | 5.749494  | -0.086568 | 4.674754  |
| C    | 4.331018  | 1.507609  | 6.762768  |
| C    | 4.527886  | 0.209042  | 7.255033  |
| H    | 5.438998  | -0.332558 | 7.012888  |
| C    | 3.578872  | -0.387920 | 8.076051  |
| H    | 3.743804  | -1.395085 | 8.449496  |
| C    | 2.422195  | 0.309767  | 8.424185  |
| H    | 1.680003  | -0.155575 | 9.067464  |
| C    | 2.226604  | 1.604146  | 7.954834  |

|   |           |           |           |
|---|-----------|-----------|-----------|
| H | 1.337565  | 2.163124  | 8.229874  |
| C | 3.177882  | 2.202661  | 7.129069  |
| H | 3.024526  | 3.216955  | 6.778092  |
| C | 7.110213  | 1.977183  | 6.657310  |
| C | 8.194156  | 1.245661  | 6.161403  |
| H | 8.149095  | 0.814983  | 5.164911  |
| C | 9.333339  | 1.044344  | 6.940187  |
| H | 10.163027 | 0.467258  | 6.540267  |
| C | 9.401356  | 1.570250  | 8.226280  |
| H | 10.287020 | 1.411617  | 8.835562  |
| C | 8.322395  | 2.294407  | 8.731141  |
| H | 8.362627  | 2.703093  | 9.737230  |
| C | 7.185769  | 2.497559  | 7.955477  |
| H | 6.351778  | 3.059407  | 8.363727  |
| C | 3.579843  | 3.803856  | 4.319567  |
| C | 8.135587  | 6.110891  | 4.454936  |
| H | 8.947320  | 6.476491  | 5.094619  |
| H | 8.566277  | 5.367578  | 3.776259  |
| C | 6.358437  | 6.918633  | 2.801769  |
| H | 6.638842  | 6.177689  | 2.044425  |
| H | 6.019061  | 7.816514  | 2.273562  |
| C | 4.912716  | 5.414137  | 7.459596  |
| C | 6.785941  | 8.314435  | 8.172166  |
| C | 6.883267  | 9.453606  | 8.985814  |
| H | 6.264484  | 10.324171 | 8.784624  |
| C | 7.784619  | 9.496064  | 10.044505 |
| H | 7.845860  | 10.385371 | 10.665997 |
| C | 8.607034  | 8.400519  | 10.304868 |
| H | 9.310600  | 8.433078  | 11.132375 |
| C | 8.522707  | 7.268140  | 9.501064  |
| H | 9.160628  | 6.410564  | 9.695684  |
| C | 7.616095  | 7.222211  | 8.442689  |
| H | 7.550002  | 6.334800  | 7.818786  |
| C | 6.020778  | 9.677296  | 5.746707  |
| C | 7.204039  | 10.407817 | 5.897057  |
| H | 7.906219  | 10.149502 | 6.683544  |
| C | 7.496966  | 11.465255 | 5.036533  |
| H | 8.423008  | 12.019435 | 5.164798  |
| C | 6.611601  | 11.809517 | 4.019661  |
| H | 6.841170  | 12.634552 | 3.350941  |
| C | 5.431619  | 11.083756 | 3.859080  |
| H | 4.736475  | 11.338655 | 3.063716  |
| C | 5.142057  | 10.022666 | 4.710049  |
| H | 4.234325  | 9.444578  | 4.555901  |
| C | 4.073089  | 8.911080  | 7.603008  |
| H | 4.151387  | 9.773119  | 8.264052  |
| C | 2.893878  | 8.348061  | 7.330947  |
| H | 1.965114  | 8.712829  | 7.769536  |
| C | 1.884065  | 7.597186  | 4.781542  |
| C | 1.486522  | 8.939945  | 4.758611  |

|   |           |           |           |
|---|-----------|-----------|-----------|
| H | 1.745864  | 9.599301  | 5.581104  |
| C | 0.762447  | 9.453142  | 3.684169  |
| H | 0.463353  | 10.497870 | 3.689372  |
| C | 0.418894  | 8.630772  | 2.615527  |
| H | -0.150577 | 9.028319  | 1.779906  |
| C | 0.814261  | 7.295464  | 2.623689  |
| H | 0.556360  | 6.644553  | 1.792788  |
| C | 1.550258  | 6.784296  | 3.689082  |
| H | 1.861133  | 5.746049  | 3.666639  |
| C | 1.599033  | 5.897849  | 7.092405  |
| C | 0.508809  | 5.284912  | 6.466213  |
| H | 0.367863  | 5.380826  | 5.395766  |
| C | -0.420883 | 4.561992  | 7.210472  |
| H | -1.263851 | 4.098317  | 6.705666  |
| C | -0.278540 | 4.442242  | 8.590715  |
| H | -1.012176 | 3.888496  | 9.170505  |
| C | 0.810480  | 5.038673  | 9.222987  |
| H | 0.936732  | 4.948483  | 10.298329 |
| C | 1.742892  | 5.756808  | 8.480149  |
| H | 2.585576  | 6.215570  | 8.988713  |
| H | 8.336162  | 7.692125  | 3.035912  |

---

**Table S10:** Cartesian coordinates of the optimized structure of  $[(\text{Fe}^{\text{II}}\text{Fe}^{\text{I}})\text{pdt}]^+$   
 ( $-4772.00017013 E_h$ )

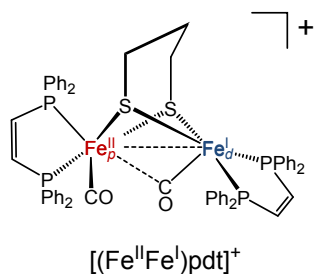

| atom | x         | y         | z        |
|------|-----------|-----------|----------|
| Fe   | 1.235518  | 6.242631  | 3.356462 |
| Fe   | 2.665259  | 4.103853  | 3.628214 |
| S    | 0.498432  | 4.149800  | 2.859644 |
| S    | 1.860092  | 5.363329  | 5.379669 |
| P    | -0.683354 | 7.262904  | 3.857985 |
| P    | 2.259539  | 8.262053  | 3.761124 |
| P    | 4.551734  | 3.424500  | 4.709203 |
| P    | 3.025931  | 2.371168  | 2.239175 |
| O    | 0.987914  | 6.895661  | 0.528640 |
| O    | 4.174740  | 5.953209  | 1.943212 |
| C    | -2.137656 | 7.121335  | 2.750258 |
| C    | -2.169236 | 6.195864  | 1.702874 |
| H    | -1.336174 | 5.517175  | 1.552733 |
| C    | -3.274842 | 6.128814  | 0.856144 |
| H    | -3.285896 | 5.405441  | 0.046297 |
| C    | -4.355444 | 6.983804  | 1.045589 |
| H    | -5.213980 | 6.932911  | 0.382460 |
| C    | -4.337009 | 7.905030  | 2.092807 |
| H    | -5.180697 | 8.570457  | 2.250035 |
| C    | -3.238306 | 7.972294  | 2.941124 |
| H    | -3.249518 | 8.679414  | 3.766297 |
| C    | -1.412820 | 7.063783  | 5.531434 |
| C    | -2.598157 | 6.348251  | 5.736137 |
| H    | -3.142023 | 5.939741  | 4.889580 |
| C    | -3.097239 | 6.170754  | 7.025259 |
| H    | -4.019604 | 5.616469  | 7.172206 |
| C    | -2.421694 | 6.708282  | 8.117819 |
| H    | -2.815283 | 6.573999  | 9.121032 |
| C    | -1.241065 | 7.423341  | 7.920028 |
| H    | -0.710839 | 7.846778  | 8.767983 |
| C    | -0.735685 | 7.598038  | 6.635633 |
| H    | 0.194868  | 8.141209  | 6.495965 |
| C    | -0.358252 | 9.061590  | 3.828562 |
| H    | -1.194173 | 9.758640  | 3.854374 |
| C    | 0.906505  | 9.487446  | 3.794737 |
| H    | 1.152086  | 10.548396 | 3.768113 |
| C    | 3.129884  | 8.559293  | 5.343638 |
| C    | 4.208973  | 7.738873  | 5.695733 |
| H    | 4.513443  | 6.922749  | 5.046531 |
| C    | 4.904173  | 7.961051  | 6.880953 |
| H    | 5.746732  | 7.323391  | 7.129430 |
| C    | 4.517890  | 8.988371  | 7.738816 |
| H    | 5.059619  | 9.158296  | 8.664715 |
| C    | 3.434968  | 9.797031  | 7.405752 |
| H    | 3.127958  | 10.600739 | 8.068695 |
| C    | 2.746241  | 9.587165  | 6.213319 |

|   |           |           |           |
|---|-----------|-----------|-----------|
| H | 1.909419  | 10.233374 | 5.966899  |
| C | 3.356426  | 9.025030  | 2.499249  |
| C | 2.775568  | 9.522934  | 1.325338  |
| H | 1.700683  | 9.468504  | 1.177610  |
| C | 3.566449  | 10.104279 | 0.339043  |
| H | 3.101619  | 10.491221 | -0.562958 |
| C | 4.945368  | 10.193081 | 0.511981  |
| H | 5.562663  | 10.648630 | -0.256639 |
| C | 5.528232  | 9.702790  | 1.677527  |
| H | 6.601978  | 9.777427  | 1.822752  |
| C | 4.741006  | 9.122040  | 2.667701  |
| H | 5.210504  | 8.757431  | 3.575213  |
| C | -0.568604 | 3.391030  | 4.144994  |
| H | -1.433420 | 4.046934  | 4.295120  |
| H | -0.929233 | 2.461184  | 3.694146  |
| C | 0.125357  | 3.094274  | 5.460549  |
| H | 0.970986  | 2.417333  | 5.281245  |
| H | -0.579986 | 2.550059  | 6.105445  |
| C | 0.596210  | 4.323637  | 6.214565  |
| H | 1.065589  | 4.015706  | 7.154046  |
| H | -0.246986 | 4.972395  | 6.466564  |
| C | 4.298287  | 2.597766  | 6.326961  |
| C | 4.578853  | 1.238631  | 6.511063  |
| H | 4.973539  | 0.644805  | 5.691730  |
| C | 4.363507  | 0.632988  | 7.747559  |
| H | 4.586993  | -0.422197 | 7.874875  |
| C | 3.875026  | 1.378745  | 8.816335  |
| H | 3.712363  | 0.907052  | 9.780847  |
| C | 3.600031  | 2.734703  | 8.645136  |
| H | 3.225208  | 3.323885  | 9.477199  |
| C | 3.802939  | 3.341323  | 7.408856  |
| H | 3.579611  | 4.397529  | 7.281277  |
| C | 6.018704  | 4.500943  | 4.984838  |
| C | 6.603251  | 5.110502  | 3.864624  |
| H | 6.160547  | 4.991602  | 2.881555  |
| C | 7.760831  | 5.871032  | 4.002130  |
| H | 8.204285  | 6.332917  | 3.125004  |
| C | 8.351504  | 6.030196  | 5.253965  |
| H | 9.257809  | 6.619278  | 5.358797  |
| C | 7.781400  | 5.420485  | 6.368598  |
| H | 8.245018  | 5.526060  | 7.345408  |
| C | 6.621413  | 4.658623  | 6.238087  |
| H | 6.199345  | 4.176088  | 7.113297  |
| C | 5.322801  | 2.119324  | 3.684988  |
| H | 6.311699  | 1.750180  | 3.955332  |
| C | 4.674785  | 1.674154  | 2.604305  |
| H | 5.103722  | 0.911330  | 1.956243  |
| C | 1.910040  | 0.944908  | 2.547131  |
| C | 0.805250  | 0.715878  | 1.717335  |
| H | 0.644245  | 1.339441  | 0.843307  |



|   |           |           |           |
|---|-----------|-----------|-----------|
| C | -0.084104 | -0.316338 | 2.005035  |
| H | -0.933974 | -0.489992 | 1.351311  |
| C | 0.118663  | -1.128771 | 3.119209  |
| H | -0.572974 | -1.937340 | 3.336650  |
| C | 1.214757  | -0.904871 | 3.949152  |
| H | 1.381598  | -1.537571 | 4.816075  |
| C | 2.104565  | 0.128720  | 3.667772  |
| H | 2.953997  | 0.295508  | 4.324304  |
| C | 2.689168  | 3.813651  | -1.597875 |
| H | 2.411645  | 4.750632  | -2.070974 |
| C | 2.672389  | 3.714806  | -0.208018 |
| H | 2.380601  | 4.572304  | 0.384949  |
| C | 1.087416  | 6.663880  | 1.655964  |
| C | 3.427410  | 5.365613  | 2.623358  |
| C | 3.025857  | 2.517379  | 0.417543  |
| C | 3.387104  | 1.413080  | -0.368722 |
| H | 3.635342  | 0.463564  | 0.098423  |
| C | 3.407829  | 1.515905  | -1.754718 |
| H | 3.691369  | 0.656416  | -2.354919 |
| C | 3.060853  | 2.718234  | -2.370988 |
| H | 3.077371  | 2.796733  | -3.454058 |

---

**Table S11:** Cartesian coordinates of the optimized structure of  $[t\mathbf{H}-(\text{Fe}^{\text{II}}\text{Fe}^{\text{II}})\text{pdt}]^+$   
 (-4772.61253629  $E_h$ )

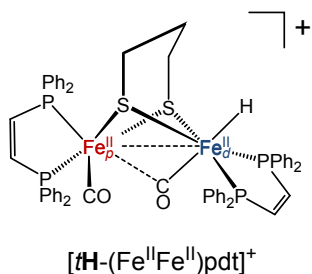

| atom | x         | y         | z         |
|------|-----------|-----------|-----------|
| Fe   | 12.418874 | 3.295460  | 4.103115  |
| Fe   | 14.030377 | 5.306776  | 4.363357  |
| S    | 13.222384 | 4.560551  | 2.368542  |
| S    | 14.611904 | 3.152060  | 4.697286  |
| P    | 10.468949 | 2.893672  | 3.096764  |
| P    | 11.900960 | 1.711493  | 5.570303  |
| P    | 15.972006 | 6.233788  | 3.785380  |
| P    | 13.106899 | 7.402976  | 4.111534  |
| C    | 14.896913 | 2.255579  | 2.002317  |
| O    | 11.246499 | 5.210619  | 5.960640  |
| O    | 14.532724 | 5.777125  | 7.199300  |
| C    | 10.617698 | 2.383294  | 1.345608  |
| C    | 10.610449 | 1.028113  | 0.998135  |
| H    | 10.468905 | 0.269147  | 1.762877  |
| C    | 10.787497 | 0.637451  | -0.327634 |
| H    | 10.774480 | -0.418028 | -0.583439 |
| C    | 10.973999 | 1.596207  | -1.319584 |
| H    | 11.107773 | 1.291854  | -2.353458 |
| C    | 10.985923 | 2.948610  | -0.981347 |
| H    | 11.130181 | 3.701659  | -1.750760 |
| C    | 10.813257 | 3.343247  | 0.342814  |
| H    | 10.835727 | 4.399587  | 0.594744  |
| C    | 8.961929  | 3.961763  | 3.123387  |
| C    | 8.572710  | 4.522548  | 4.348563  |
| H    | 9.181855  | 4.380498  | 5.234364  |
| C    | 7.397952  | 5.262828  | 4.446442  |
| H    | 7.112152  | 5.688657  | 5.403789  |
| C    | 6.591551  | 5.450312  | 3.326052  |
| H    | 5.674142  | 6.026375  | 3.403492  |
| C    | 6.961462  | 4.884568  | 2.108621  |
| H    | 6.330068  | 5.010942  | 1.233669  |
| C    | 8.136562  | 4.141941  | 2.005676  |
| H    | 8.400113  | 3.694591  | 1.053297  |
| C    | 9.753321  | 1.424378  | 3.918204  |
| H    | 8.828714  | 1.002150  | 3.525921  |
| C    | 10.336622 | 0.949395  | 5.021956  |
| H    | 9.931989  | 0.096348  | 5.564958  |
| C    | 11.600995 | 2.174743  | 7.311816  |
| C    | 11.857570 | 4.581516  | 5.192395  |
| C    | 14.367197 | 3.529347  | 1.371881  |
| H    | 13.797210 | 3.278976  | 0.471306  |
| H    | 15.187087 | 4.184866  | 1.067753  |
| C    | 15.605690 | 2.433558  | 3.330047  |
| H    | 16.493700 | 3.065856  | 3.222070  |
| H    | 15.937739 | 1.460790  | 3.706515  |
| C    | 14.329354 | 5.622453  | 6.074510  |

|   |           |           |           |
|---|-----------|-----------|-----------|
| C | 16.608584 | 6.050376  | 2.072523  |
| C | 17.732603 | 5.266596  | 1.788449  |
| H | 18.281466 | 4.787349  | 2.593661  |
| C | 18.166233 | 5.112266  | 0.472978  |
| H | 19.041069 | 4.503546  | 0.264130  |
| C | 17.487646 | 5.742783  | -0.566649 |
| H | 17.830943 | 5.626455  | -1.590320 |
| C | 16.369048 | 6.527860  | -0.289614 |
| H | 15.837194 | 7.023816  | -1.096188 |
| C | 15.928001 | 6.678850  | 1.021198  |
| H | 15.043885 | 7.277140  | 1.223316  |
| C | 15.755918 | 8.046820  | 3.863628  |
| H | 16.627103 | 8.695411  | 3.789603  |
| C | 14.522144 | 8.545576  | 3.969130  |
| H | 14.341479 | 9.618908  | 4.012929  |
| C | 12.201731 | 8.203500  | 5.497574  |
| H | 12.559965 | 2.029899  | 3.307211  |
| H | 14.073918 | 1.545077  | 2.128253  |
| C | 12.997228 | 0.238607  | 5.670842  |
| C | 13.334086 | -0.428098 | 4.484925  |
| H | 12.974377 | -0.049263 | 3.532196  |
| C | 14.122959 | -1.573065 | 4.517724  |
| H | 14.370811 | -2.083418 | 3.591357  |
| C | 14.591819 | -2.064191 | 5.735408  |
| H | 15.210604 | -2.956332 | 5.761286  |
| C | 14.258455 | -1.410145 | 6.917413  |
| H | 14.614633 | -1.789974 | 7.870531  |
| C | 13.460401 | -0.267809 | 6.889077  |
| H | 13.200075 | 0.224595  | 7.819963  |
| C | 12.645686 | 2.774168  | 8.029625  |
| C | 12.451093 | 3.182486  | 9.344595  |
| H | 13.268134 | 3.644303  | 9.890700  |
| C | 11.209187 | 3.008748  | 9.954040  |
| H | 11.056623 | 3.332275  | 10.979391 |
| C | 10.164057 | 2.424862  | 9.244425  |
| H | 9.193731  | 2.290610  | 9.713433  |
| C | 10.357218 | 2.007694  | 7.928812  |
| H | 9.529874  | 1.559187  | 7.387132  |
| C | 17.467017 | 5.959352  | 4.809815  |
| C | 17.510480 | 4.947453  | 5.773642  |
| H | 16.655024 | 4.294445  | 5.914008  |
| C | 18.654209 | 4.762336  | 6.548923  |
| H | 18.674553 | 3.972255  | 7.293603  |
| C | 19.761407 | 5.585271  | 6.371051  |
| H | 20.649923 | 5.442865  | 6.979002  |
| C | 19.731313 | 6.591322  | 5.405391  |
| C | 18.594926 | 6.775212  | 4.626793  |
| C | 12.092608 | 7.780396  | 2.637493  |
| C | 12.455766 | 8.774956  | 1.722641  |
| H | 13.364112 | 9.351837  | 1.868351  |

|   |           |          |           |
|---|-----------|----------|-----------|
| C | 11.653397 | 9.041262 | 0.615076  |
| H | 11.945492 | 9.818670 | -0.084892 |
| C | 10.477463 | 8.323997 | 0.414431  |
| H | 9.847712  | 8.540528 | -0.443518 |
| C | 10.110071 | 7.329119 | 1.318621  |
| H | 9.193323  | 6.764676 | 1.175481  |
| C | 10.918256 | 7.049474 | 2.416836  |
| H | 10.625278 | 6.260841 | 3.104158  |
| C | 12.930959 | 8.583097 | 6.632418  |
| H | 14.002918 | 8.414114 | 6.679449  |
| C | 12.294110 | 9.193347 | 7.708394  |
| H | 12.873384 | 9.486577 | 8.578906  |
| C | 10.922461 | 9.430213 | 7.665172  |
| H | 10.425353 | 9.908201 | 8.504068  |
| C | 10.192975 | 9.059551 | 6.538821  |
| H | 9.124700  | 9.250228 | 6.494093  |
| C | 10.826209 | 8.450629 | 5.458944  |
| H | 10.244186 | 8.181763 | 4.584002  |
| H | 13.614979 | 2.919027 | 7.558388  |
| H | 20.595714 | 7.231537 | 5.256432  |
| H | 18.598222 | 7.546302 | 3.861269  |
| H | 15.606150 | 1.799330 | 1.296529  |

---

**Table S12:** Cartesian coordinates of the optimized structure of  $[t\text{H}-(\text{Fe}^{\text{I}}\text{Fe}^{\text{II}})\text{pdt}]^0$   
 (-4772.77741619  $E_h$ )

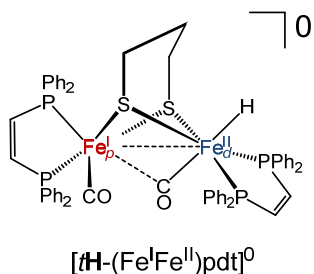

| atom | x         | y         | z         |
|------|-----------|-----------|-----------|
| Fe   | 12.203894 | 3.225618  | 4.203989  |
| Fe   | 14.093258 | 5.460734  | 4.443761  |
| S    | 13.135382 | 4.552239  | 2.528187  |
| S    | 14.409692 | 3.236835  | 4.970841  |
| P    | 10.362954 | 2.792279  | 3.095101  |
| P    | 11.703783 | 1.591573  | 5.563273  |
| P    | 16.108002 | 6.310077  | 3.712825  |
| P    | 13.256432 | 7.517827  | 4.114950  |
| C    | 14.874939 | 2.258628  | 2.321062  |
| O    | 11.042214 | 5.290461  | 5.928213  |
| O    | 14.549665 | 5.970882  | 7.269907  |
| C    | 10.562816 | 2.342512  | 1.328462  |
| C    | 10.532797 | 1.006720  | 0.914527  |
| H    | 10.340286 | 0.218660  | 1.637548  |
| C    | 10.758307 | 0.670729  | -0.418737 |
| H    | 10.730422 | -0.372008 | -0.723232 |
| C    | 11.018026 | 1.667238  | -1.355526 |
| H    | 11.194344 | 1.406383  | -2.395423 |
| C    | 11.054320 | 3.000861  | -0.952183 |
| H    | 11.263262 | 3.784276  | -1.675414 |
| C    | 10.832033 | 3.339623  | 0.380138  |
| H    | 10.886099 | 4.379997  | 0.686426  |
| C    | 8.830977  | 3.835786  | 3.082489  |
| C    | 8.398472  | 4.368390  | 4.305059  |
| H    | 8.980799  | 4.203377  | 5.205338  |
| C    | 7.226443  | 5.115433  | 4.380482  |
| H    | 6.911015  | 5.521162  | 5.337603  |
| C    | 6.466135  | 5.344208  | 3.235757  |
| H    | 5.553366  | 5.930730  | 3.293660  |
| C    | 6.881171  | 4.812847  | 2.017413  |
| H    | 6.289971  | 4.977122  | 1.120327  |
| C    | 8.052466  | 4.060595  | 1.940448  |
| H    | 8.356304  | 3.644964  | 0.985281  |
| C    | 9.628581  | 1.279706  | 3.830844  |
| H    | 8.729069  | 0.848556  | 3.391422  |
| C    | 10.185488 | 0.777401  | 4.937192  |
| H    | 9.780032  | -0.108744 | 5.423647  |
| C    | 11.342309 | 1.907797  | 7.337193  |
| C    | 11.612665 | 4.552387  | 5.229661  |
| C    | 14.340461 | 3.498522  | 1.621997  |
| H    | 13.835372 | 3.194708  | 0.698364  |
| H    | 15.163445 | 4.161682  | 1.341436  |
| C    | 15.490664 | 2.475824  | 3.691343  |
| H    | 16.375631 | 3.119801  | 3.621571  |
| H    | 15.814471 | 1.511786  | 4.098532  |
| C    | 14.365298 | 5.808270  | 6.130137  |

|   |           |           |           |
|---|-----------|-----------|-----------|
| C | 16.745360 | 6.105846  | 1.991645  |
| C | 17.851842 | 5.299140  | 1.697760  |
| H | 18.418076 | 4.842795  | 2.504635  |
| C | 18.239728 | 5.080777  | 0.377694  |
| H | 19.101945 | 4.452975  | 0.168792  |
| C | 17.530543 | 5.665194  | -0.668932 |
| H | 17.835238 | 5.495557  | -1.697917 |
| C | 16.426181 | 6.467516  | -0.387240 |
| H | 15.863482 | 6.925126  | -1.196491 |
| C | 16.033826 | 6.683297  | 0.930288  |
| H | 15.158833 | 7.294467  | 1.135144  |
| C | 15.904886 | 8.137349  | 3.717398  |
| H | 16.771462 | 8.785442  | 3.586091  |
| C | 14.677547 | 8.650247  | 3.850764  |
| H | 14.510857 | 9.727715  | 3.854661  |
| C | 12.418277 | 8.440122  | 5.480040  |
| H | 12.503446 | 1.988110  | 3.372508  |
| H | 14.072409 | 1.520364  | 2.410264  |
| C | 12.858214 | 0.158042  | 5.640820  |
| C | 13.054222 | -0.608932 | 4.485473  |
| H | 12.524037 | -0.348847 | 3.572988  |
| C | 13.928237 | -1.691142 | 4.494758  |
| H | 14.066524 | -2.280092 | 3.592017  |
| C | 14.628174 | -2.014322 | 5.656382  |
| H | 15.314975 | -2.856282 | 5.663034  |
| C | 14.444116 | -1.252528 | 6.806561  |
| H | 14.988542 | -1.495310 | 7.715007  |
| C | 13.560448 | -0.174642 | 6.802151  |
| H | 13.422075 | 0.410553  | 7.705684  |
| C | 12.119754 | 2.863646  | 8.003851  |
| C | 11.900536 | 3.138280  | 9.351144  |
| H | 12.511869 | 3.884407  | 9.850185  |
| C | 10.894644 | 2.471394  | 10.046268 |
| H | 10.717100 | 2.693076  | 11.095031 |
| C | 10.112965 | 1.522337  | 9.391478  |
| H | 9.324729  | 1.000265  | 9.927167  |
| C | 10.338705 | 1.237655  | 8.047222  |
| H | 9.722559  | 0.490726  | 7.556360  |
| C | 17.648007 | 6.107534  | 4.703623  |
| C | 17.657233 | 5.159255  | 5.731573  |
| H | 16.767720 | 4.561622  | 5.913459  |
| C | 18.794694 | 4.980683  | 6.518421  |
| H | 18.786953 | 4.240599  | 7.313712  |
| C | 19.931015 | 5.749940  | 6.288490  |
| H | 20.815860 | 5.614128  | 6.904512  |
| C | 19.934104 | 6.695449  | 5.262601  |
| C | 18.802203 | 6.869841  | 4.473579  |
| C | 12.170242 | 7.877014  | 2.675757  |
| C | 12.483779 | 8.840221  | 1.711218  |
| H | 13.398395 | 9.419682  | 1.796604  |

|   |           |           |           |
|---|-----------|-----------|-----------|
| C | 11.632609 | 9.067196  | 0.631039  |
| H | 11.892325 | 9.819392  | -0.109153 |
| C | 10.451620 | 8.341046  | 0.506170  |
| H | 9.784504  | 8.524397  | -0.331801 |
| C | 10.130516 | 7.375562  | 1.458743  |
| H | 9.213960  | 6.798356  | 1.372113  |
| C | 10.990201 | 7.135380  | 2.527117  |
| H | 10.739233 | 6.363996  | 3.249841  |
| C | 13.194768 | 8.859075  | 6.568693  |
| H | 14.261440 | 8.655043  | 6.585994  |
| C | 12.613978 | 9.536045  | 7.636656  |
| H | 13.233457 | 9.853757  | 8.470872  |
| C | 11.246661 | 9.800914  | 7.636844  |
| H | 10.791859 | 10.327704 | 8.471293  |
| C | 10.466990 | 9.387151  | 6.560427  |
| H | 9.399623  | 9.590876  | 6.549394  |
| C | 11.047183 | 8.713345  | 5.488639  |
| H | 10.425487 | 8.409115  | 4.653134  |
| H | 12.899867 | 3.396398  | 7.467604  |
| H | 20.821303 | 7.294702  | 5.075944  |
| H | 18.824094 | 7.592761  | 3.661892  |
| H | 15.644915 | 1.815341  | 1.670081  |

---

**Table S13:** Cartesian coordinates of the optimized structure of *sym*-[ $\mu$ H-(Fe<sup>II</sup>Fe<sup>II</sup>)pdt]<sup>+</sup> (-4772.63198301 *E<sub>h</sub>*)

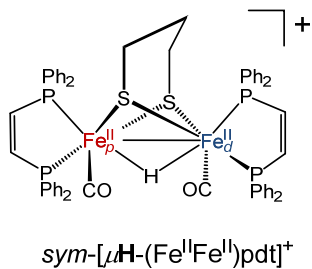

| atom | x         | y         | z         |
|------|-----------|-----------|-----------|
| Fe   | 5.155846  | 4.128140  | 4.506640  |
| Fe   | 4.995650  | 6.194918  | 6.092929  |
| S    | 6.946050  | 5.054845  | 5.611703  |
| S    | 4.821468  | 6.284632  | 3.799051  |
| P    | 6.064959  | 3.161669  | 2.686187  |
| P    | 5.421891  | 2.123168  | 5.548439  |
| P    | 5.623471  | 8.287389  | 6.696267  |
| P    | 2.852875  | 6.913782  | 6.468464  |
| O    | 2.512349  | 3.309907  | 3.618696  |
| O    | 5.262330  | 5.280793  | 8.837915  |
| C    | 7.545725  | 7.174819  | 3.786467  |
| H    | 7.331788  | 7.975807  | 4.496104  |
| C    | 5.220709  | 3.333217  | 1.066385  |
| C    | 4.249238  | 4.317540  | 0.861327  |
| H    | 3.995177  | 5.003408  | 1.664017  |
| C    | 3.613022  | 4.431574  | -0.373898 |
| H    | 2.862515  | 5.202550  | -0.521263 |
| C    | 3.936016  | 3.563219  | -1.411389 |
| H    | 3.435674  | 3.650030  | -2.371371 |
| C    | 4.908954  | 2.582627  | -1.218612 |
| H    | 5.170367  | 1.906176  | -2.026925 |
| C    | 5.550796  | 2.470926  | 0.009087  |
| H    | 6.325317  | 1.719127  | 0.133791  |
| C    | 7.835059  | 3.369349  | 2.234173  |
| C    | 8.822890  | 2.838085  | 3.073467  |
| H    | 8.541821  | 2.301083  | 3.974273  |
| C    | 10.170527 | 3.015407  | 2.775821  |
| H    | 10.925968 | 2.593867  | 3.432394  |
| C    | 10.548527 | 3.734584  | 1.643058  |
| H    | 11.600439 | 3.872869  | 1.411437  |
| C    | 9.572687  | 4.273322  | 0.808566  |
| H    | 9.860006  | 4.832555  | -0.077039 |
| C    | 8.222003  | 4.090355  | 1.098496  |
| H    | 7.470929  | 4.498492  | 0.428940  |
| C    | 5.972444  | 1.357402  | 2.980826  |
| H    | 6.153726  | 0.669745  | 2.156456  |
| C    | 5.688804  | 0.911251  | 4.207595  |
| H    | 5.621662  | -0.154934 | 4.420189  |
| C    | 4.040565  | 1.377914  | 6.495262  |
| C    | 4.145925  | 0.049150  | 6.932854  |
| H    | 5.049765  | -0.521713 | 6.736188  |
| C    | 3.108884  | -0.541863 | 7.643536  |
| H    | 3.199757  | -1.572326 | 7.974146  |
| C    | 1.959043  | 0.191036  | 7.937328  |
| H    | 1.149665  | -0.270721 | 8.495314  |
| C    | 1.854657  | 1.514736  | 7.523537  |



|   |          |           |           |
|---|----------|-----------|-----------|
| H | 0.971348 | 2.098394  | 7.761574  |
| C | 2.891080 | 2.108164  | 6.804278  |
| H | 2.801785 | 3.144825  | 6.496519  |
| C | 6.837870 | 1.788032  | 6.667275  |
| C | 7.933978 | 1.015234  | 6.270768  |
| H | 7.964216 | 0.575307  | 5.277749  |
| C | 8.987441 | 0.780262  | 7.153114  |
| H | 9.827540 | 0.168688  | 6.836639  |
| C | 8.955100 | 1.314797  | 8.437428  |
| H | 9.774146 | 1.128307  | 9.125773  |
| C | 7.861678 | 2.079542  | 8.841615  |
| H | 7.824242 | 2.491359  | 9.845839  |
| C | 6.808487 | 2.313868  | 7.964513  |
| H | 5.956954 | 2.898342  | 8.298693  |
| C | 3.571811 | 3.625464  | 3.958948  |
| C | 8.099808 | 5.975397  | 4.526741  |
| H | 8.917084 | 6.298019  | 5.180878  |
| H | 8.514954 | 5.241001  | 3.832664  |
| C | 6.313163 | 6.924916  | 2.939179  |
| H | 6.530399 | 6.224741  | 2.125355  |
| H | 5.995275 | 7.867351  | 2.482097  |
| C | 5.141601 | 5.670750  | 7.756748  |
| C | 7.009353 | 8.496196  | 7.877239  |
| C | 7.168271 | 9.694442  | 8.591798  |
| H | 6.492545 | 10.528979 | 8.425879  |
| C | 8.205524 | 9.838593  | 9.506366  |
| H | 8.315635 | 10.770267 | 10.053352 |
| C | 9.100302 | 8.790346  | 9.719080  |
| H | 9.909041 | 8.903954  | 10.434936 |
| C | 8.953091 | 7.600413  | 9.013604  |
| H | 9.645371 | 6.779634  | 9.175971  |
| C | 7.912454 | 7.451296  | 8.098458  |
| H | 7.797943 | 6.514458  | 7.560753  |
| C | 5.854504 | 9.645964  | 5.470159  |
| C | 6.995887 | 10.454824 | 5.437423  |
| H | 7.799053 | 10.297537 | 6.150120  |
| C | 7.114221 | 11.463560 | 4.483318  |
| H | 8.005782 | 12.083649 | 4.468033  |
| C | 6.097333 | 11.676862 | 3.556861  |
| H | 6.191118 | 12.466041 | 2.816705  |
| C | 4.959031 | 10.872581 | 3.582016  |
| H | 4.160879 | 11.030831 | 2.862582  |
| C | 4.838529 | 9.860561  | 4.529213  |
| H | 3.951339 | 9.233747  | 4.527811  |
| C | 4.210446 | 8.967659  | 7.643787  |
| H | 4.352147 | 9.859185  | 8.252129  |
| C | 3.014224 | 8.384986  | 7.534686  |
| H | 2.139970 | 8.761562  | 8.064124  |
| C | 1.793476 | 7.513298  | 5.095804  |
| C | 1.295594 | 8.822203  | 5.076914  |

|   |           |           |           |
|---|-----------|-----------|-----------|
| H | 1.545265  | 9.516640  | 5.873030  |
| C | 0.478111  | 9.252696  | 4.034284  |
| H | 0.097857  | 10.270026 | 4.036510  |
| C | 0.142513  | 8.381295  | 3.001792  |
| H | -0.500801 | 8.716071  | 2.193441  |
| C | 0.635310  | 7.078458  | 3.010186  |
| H | 0.379402  | 6.391347  | 2.209089  |
| C | 1.462796  | 6.649119  | 4.043628  |
| H | 1.842426  | 5.633793  | 4.027366  |
| C | 1.697858  | 5.900378  | 7.484310  |
| C | 0.536453  | 5.323515  | 6.958999  |
| H | 0.287293  | 5.447621  | 5.910573  |
| C | -0.333750 | 4.615317  | 7.785897  |
| H | -1.239286 | 4.187165  | 7.365625  |
| C | -0.055985 | 4.474442  | 9.143381  |
| H | -0.742252 | 3.932930  | 9.787896  |
| C | 1.101195  | 5.041223  | 9.673243  |
| H | 1.323901  | 4.942233  | 10.731487 |
| C | 1.972316  | 5.749378  | 8.851257  |
| H | 2.859774  | 6.198692  | 9.286319  |
| H | 8.336552  | 7.559202  | 3.126060  |
| H | 4.372555  | 4.689175  | 5.838095  |

---

**Table S14:** Cartesian coordinates of the optimized structure of *sym*-[ $\mu$ H-(Fe<sup>1.5</sup>Fe<sup>1.5</sup>)pdt]<sup>0</sup> (-4772.78320098 E<sub>h</sub>)

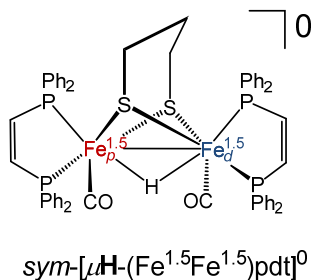

| atom | x         | y         | z         |
|------|-----------|-----------|-----------|
| Fe   | 5.140208  | 4.075987  | 4.459059  |
| Fe   | 4.978115  | 6.224414  | 6.147703  |
| S    | 6.938638  | 5.019307  | 5.627156  |
| S    | 4.749204  | 6.280335  | 3.813517  |
| P    | 6.141502  | 3.151248  | 2.630448  |
| P    | 5.375872  | 2.085481  | 5.429998  |
| P    | 5.607677  | 8.400991  | 6.696407  |
| P    | 2.874849  | 6.918914  | 6.583815  |
| O    | 2.502614  | 3.354385  | 3.507156  |
| O    | 5.347925  | 5.317199  | 8.876057  |
| C    | 7.470738  | 7.159639  | 3.801777  |
| H    | 7.234594  | 7.930880  | 4.538335  |
| C    | 5.386584  | 3.354143  | 0.962643  |
| C    | 4.428387  | 4.351771  | 0.758770  |
| H    | 4.154424  | 5.007802  | 1.581334  |
| C    | 3.830653  | 4.510538  | -0.491153 |
| H    | 3.089249  | 5.291499  | -0.634909 |
| C    | 4.178997  | 3.673426  | -1.546133 |
| H    | 3.709200  | 3.795247  | -2.518355 |
| C    | 5.136823  | 2.677652  | -1.354278 |
| H    | 5.417069  | 2.023945  | -2.175799 |
| C    | 5.738392  | 2.521803  | -0.110363 |
| H    | 6.500804  | 1.757896  | 0.019232  |
| C    | 7.943748  | 3.244302  | 2.244732  |
| C    | 8.854738  | 2.708069  | 3.165419  |
| H    | 8.492501  | 2.214184  | 4.062383  |
| C    | 10.225185 | 2.830282  | 2.958843  |
| H    | 10.915995 | 2.409249  | 3.684112  |
| C    | 10.708736 | 3.498058  | 1.835080  |
| H    | 11.778957 | 3.596265  | 1.675971  |
| C    | 9.811530  | 4.043477  | 0.920080  |
| H    | 10.178748 | 4.569161  | 0.042730  |
| C    | 8.438739  | 3.918240  | 1.121636  |
| H    | 7.750732  | 4.345107  | 0.397988  |
| C    | 5.965088  | 1.336900  | 2.872009  |
| H    | 6.138333  | 0.660326  | 2.035666  |
| C    | 5.631028  | 0.872542  | 4.080018  |
| H    | 5.514600  | -0.195609 | 4.261673  |
| C    | 3.978579  | 1.335525  | 6.365274  |
| C    | 4.024760  | -0.012256 | 6.748192  |
| H    | 4.896254  | -0.617093 | 6.509961  |
| C    | 2.974475  | -0.581263 | 7.458651  |
| H    | 3.021209  | -1.628049 | 7.746553  |
| C    | 1.869427  | 0.194354  | 7.809202  |
| H    | 1.050499  | -0.249047 | 8.369263  |
| C    | 1.823455  | 1.537469  | 7.450421  |

|   |          |           |           |
|---|----------|-----------|-----------|
| H | 0.977856 | 2.156409  | 7.734515  |
| C | 2.872772 | 2.106369  | 6.729572  |
| H | 2.837390 | 3.157293  | 6.461101  |
| C | 6.766857 | 1.686318  | 6.568565  |
| C | 7.781754 | 0.784773  | 6.232923  |
| H | 7.772706 | 0.287780  | 5.266439  |
| C | 8.811326 | 0.510024  | 7.132749  |
| H | 9.590271 | -0.196863 | 6.859257  |
| C | 8.835366 | 1.132548  | 8.376769  |
| H | 9.636488 | 0.918108  | 9.078820  |
| C | 7.826079 | 2.031616  | 8.718773  |
| H | 7.837619 | 2.525863  | 9.686018  |
| C | 6.799921 | 2.308709  | 7.822488  |
| H | 6.024709 | 3.015121  | 8.102707  |
| C | 3.572408 | 3.623554  | 3.880271  |
| C | 8.051590 | 5.945427  | 4.500803  |
| H | 8.902085 | 6.260112  | 5.116929  |
| H | 8.435004 | 5.230891  | 3.767572  |
| C | 6.243546 | 6.903126  | 2.945918  |
| H | 6.475313 | 6.188818  | 2.145636  |
| H | 5.938691 | 7.840892  | 2.468989  |
| C | 5.174501 | 5.701238  | 7.787741  |
| C | 7.010455 | 8.699696  | 7.851145  |
| C | 7.176226 | 9.903889  | 8.551173  |
| H | 6.483644 | 10.726765 | 8.393090  |
| C | 8.235770 | 10.068540 | 9.437467  |
| H | 8.351294 | 11.006724 | 9.973619  |
| C | 9.147550 | 9.031801  | 9.635331  |
| H | 9.974242 | 9.160430  | 10.328795 |
| C | 8.994107 | 7.833873  | 8.944310  |
| H | 9.698806 | 7.021056  | 9.096202  |
| C | 7.930483 | 7.666300  | 8.058522  |
| H | 7.802066 | 6.724629  | 7.529918  |
| C | 5.772771 | 9.778268  | 5.474831  |
| C | 6.910614 | 10.586316 | 5.362182  |
| H | 7.738871 | 10.457142 | 6.052019  |
| C | 6.994349 | 11.557529 | 4.366247  |
| H | 7.885444 | 12.175744 | 4.295095  |
| C | 5.945451 | 11.737021 | 3.468514  |
| H | 6.012004 | 12.496131 | 2.693970  |
| C | 4.812426 | 10.930613 | 3.565947  |
| H | 3.990191 | 11.054486 | 2.866379  |
| C | 4.728880 | 9.955183  | 4.554406  |
| H | 3.849386 | 9.319207  | 4.601900  |
| C | 4.200454 | 9.052315  | 7.681894  |
| H | 4.325727 | 9.946687  | 8.291561  |
| C | 3.022870 | 8.421863  | 7.622112  |
| H | 2.158195 | 8.773592  | 8.184997  |
| C | 1.746472 | 7.485086  | 5.242686  |
| C | 1.218510 | 8.781372  | 5.208644  |

|   |           |           |           |
|---|-----------|-----------|-----------|
| H | 1.474539  | 9.494210  | 5.986704  |
| C | 0.369800  | 9.176485  | 4.176419  |
| H | -0.029320 | 10.187221 | 4.166938  |
| C | 0.029432  | 8.279311  | 3.167735  |
| H | -0.636334 | 8.586117  | 2.365685  |
| C | 0.551214  | 6.987902  | 3.190083  |
| H | 0.299549  | 6.280648  | 2.404895  |
| C | 1.411400  | 6.596564  | 4.212227  |
| H | 1.820828  | 5.592338  | 4.202027  |
| C | 1.723521  | 5.940802  | 7.653593  |
| C | 0.528337  | 5.382967  | 7.186510  |
| H | 0.231693  | 5.517637  | 6.151496  |
| C | -0.307794 | 4.673697  | 8.047537  |
| H | -1.237281 | 4.258229  | 7.667105  |
| C | 0.036247  | 4.510790  | 9.387127  |
| H | -0.619855 | 3.963657  | 10.058546 |
| C | 1.226578  | 5.058248  | 9.861023  |
| H | 1.507134  | 4.937789  | 10.903711 |
| C | 2.063236  | 5.765309  | 9.002923  |
| H | 2.987169  | 6.183579  | 9.389874  |
| H | 8.253469  | 7.583843  | 3.153770  |
| H | 4.395562  | 4.604584  | 5.761094  |

---

**Table S15:** Cartesian coordinates of the optimized structure of *unsym*-[ $\mu$ H-(Fe<sup>II</sup>Fe<sup>II</sup>)pdt]<sup>+</sup> (-4772.63153580 E<sub>h</sub>)

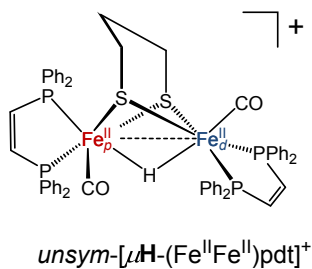

| atom | x        | y         | z         |
|------|----------|-----------|-----------|
| Fe   | 4.641740 | 13.836618 | 3.835663  |
| Fe   | 5.845623 | 11.470123 | 3.739776  |
| H    | 5.349018 | 12.645602 | 4.830471  |
| S    | 3.745760 | 11.954920 | 2.917777  |
| S    | 6.471207 | 13.349783 | 2.582851  |
| P    | 2.870163 | 14.250103 | 5.189734  |
| P    | 5.161166 | 9.875929  | 5.201064  |
| P    | 5.668364 | 15.527198 | 4.927995  |
| P    | 6.590353 | 9.749651  | 2.459318  |
| O    | 3.508941 | 15.603739 | 1.841950  |
| O    | 8.512313 | 11.456195 | 4.897654  |
| C    | 3.684576 | 12.216050 | 1.097043  |
| H    | 3.114004 | 11.374553 | 0.692492  |
| H    | 3.084237 | 13.116780 | 0.936707  |
| C    | 5.011188 | 12.302904 | 0.361352  |
| H    | 4.791191 | 12.474627 | -0.702477 |
| H    | 5.501008 | 11.326695 | 0.414055  |
| C    | 5.980691 | 13.379479 | 0.815171  |
| H    | 5.579316 | 14.379770 | 0.624028  |
| H    | 6.913690 | 13.295859 | 0.248635  |
| C    | 7.439650 | 11.463169 | 4.469187  |
| C    | 3.953985 | 14.930568 | 2.670856  |
| C    | 6.436979 | 16.859762 | 3.923555  |
| C    | 5.590185 | 17.764976 | 3.268810  |
| H    | 4.513029 | 17.694022 | 3.390620  |
| C    | 6.117104 | 18.770210 | 2.463908  |
| H    | 5.447979 | 19.467574 | 1.968546  |
| C    | 7.495537 | 18.881425 | 2.297709  |
| H    | 7.907356 | 19.665927 | 1.669828  |
| C    | 8.343184 | 17.987897 | 2.946804  |
| H    | 9.419479 | 18.073980 | 2.829942  |
| C    | 7.819972 | 16.983292 | 3.756916  |
| H    | 8.497987 | 16.310093 | 4.269729  |
| C    | 6.896437 | 15.168304 | 6.237471  |
| C    | 6.709972 | 15.579112 | 7.562790  |
| H    | 5.817458 | 16.127132 | 7.848217  |
| C    | 7.667178 | 15.286089 | 8.531846  |
| H    | 7.513165 | 15.617476 | 9.554715  |
| C    | 8.819381 | 14.581936 | 8.189534  |
| H    | 9.569983 | 14.364767 | 8.944018  |
| C    | 9.007281 | 14.158618 | 6.874726  |
| H    | 9.896225 | 13.599171 | 6.600168  |
| C    | 8.050035 | 14.445545 | 5.905514  |
| H    | 8.201545 | 14.103061 | 4.885953  |
| C    | 1.264241 | 14.375064 | 4.328745  |
| C    | 0.730314 | 15.616845 | 3.967379  |

|   |           |           |           |
|---|-----------|-----------|-----------|
| H | 1.243927  | 16.535232 | 4.237780  |
| C | -0.461210 | 15.689829 | 3.249151  |
| H | -0.865355 | 16.659918 | 2.975568  |
| C | -1.129457 | 14.524425 | 2.885033  |
| H | -2.059513 | 14.582180 | 2.327336  |
| C | -0.601248 | 13.283108 | 3.236700  |
| H | -1.118297 | 12.370949 | 2.953299  |
| C | 0.591533  | 13.204288 | 3.948977  |
| H | 0.998657  | 12.231934 | 4.211081  |
| C | 2.475533  | 13.386644 | 6.762606  |
| C | 3.540495  | 13.031498 | 7.598474  |
| H | 4.563115  | 13.199074 | 7.272317  |
| C | 3.298703  | 12.457345 | 8.843314  |
| H | 4.135615  | 12.171828 | 9.472932  |
| C | 1.989634  | 12.234139 | 9.265977  |
| H | 1.800153  | 11.783072 | 10.235588 |
| C | 0.924299  | 12.593812 | 8.443297  |
| H | -0.098238 | 12.432452 | 8.772733  |
| C | 1.162512  | 13.171183 | 7.197770  |
| H | 0.325086  | 13.453482 | 6.568169  |
| C | 8.273624  | 9.930629  | 1.763569  |
| C | 9.386465  | 9.464382  | 2.472427  |
| H | 9.256986  | 8.949739  | 3.420174  |
| C | 10.673063 | 9.662684  | 1.976232  |
| H | 11.526703 | 9.293162  | 2.536541  |
| C | 10.862663 | 10.328743 | 0.769259  |
| H | 11.865740 | 10.480654 | 0.382141  |
| C | 9.760285  | 10.797758 | 0.056538  |
| H | 9.901047  | 11.313510 | -0.888786 |
| C | 8.474819  | 10.604025 | 0.550939  |
| H | 7.625074  | 10.962180 | -0.022872 |
| C | 5.631229  | 8.916708  | 1.125289  |
| C | 6.265731  | 8.219040  | 0.089509  |
| H | 7.347865  | 8.226400  | 0.006889  |
| C | 5.511469  | 7.514603  | -0.845753 |
| H | 6.014416  | 6.982368  | -1.647790 |
| C | 4.122262  | 7.489359  | -0.752480 |
| H | 3.537511  | 6.939921  | -1.484320 |
| C | 3.485568  | 8.168865  | 0.284126  |
| H | 2.402625  | 8.149389  | 0.366484  |
| C | 4.234054  | 8.879275  | 1.218379  |
| H | 3.730626  | 9.408171  | 2.023167  |
| C | 3.440475  | 9.239165  | 5.213862  |
| C | 2.465619  | 9.877102  | 5.990404  |
| H | 2.733684  | 10.718120 | 6.621356  |
| C | 1.150480  | 9.421405  | 5.977580  |
| H | 0.408192  | 9.922755  | 6.591500  |
| C | 0.793089  | 8.325489  | 5.194172  |
| H | -0.232372 | 7.967583  | 5.191959  |
| C | 1.758976  | 7.682661  | 4.424766  |

|   |          |           |           |
|---|----------|-----------|-----------|
| H | 1.492688 | 6.818514  | 3.822957  |
| C | 5.566471 | 10.023402 | 6.986480  |
| C | 5.160846 | 9.015616  | 7.873600  |
| H | 4.532767 | 8.201235  | 7.522395  |
| C | 5.546451 | 9.054687  | 9.209197  |
| H | 5.227393 | 8.266641  | 9.885022  |
| C | 6.343494 | 10.099405 | 9.676821  |
| H | 6.651380 | 10.123774 | 10.718240 |
| C | 6.741363 | 11.110157 | 8.805806  |
| H | 7.355572 | 11.933071 | 9.159280  |
| C | 6.352030 | 11.074690 | 7.467651  |
| H | 6.659621 | 11.877005 | 6.806173  |
| C | 6.106632 | 8.370471  | 4.765356  |
| H | 6.108032 | 7.526836  | 5.454580  |
| C | 6.758939 | 8.331203  | 3.600728  |
| H | 7.310618 | 7.449710  | 3.275475  |
| C | 4.363049 | 16.456501 | 5.804351  |
| H | 4.594730 | 17.426208 | 6.243537  |
| C | 3.138345 | 15.925770 | 5.874207  |
| H | 2.325578 | 16.423463 | 6.402574  |
| C | 3.076307 | 8.136187  | 4.432646  |
| H | 3.820096 | 7.620234  | 3.832613  |

---



**Table S16:** Cartesian coordinates of the optimized structure of *unsym*-[ $\mu$ H-(Fe<sup>I</sup>Fe<sup>II</sup>)pdt]<sup>0</sup> (-4772.78280972 E<sub>h</sub>)

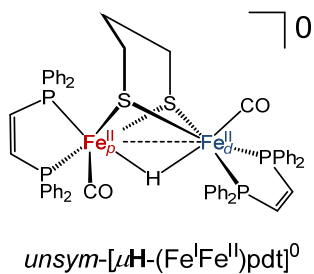

| atom | x         | y         | z        |
|------|-----------|-----------|----------|
| Fe   | 10.524401 | 0.209814  | 4.818341 |
| H    | 10.727185 | 1.682356  | 4.249856 |
| Fe   | 10.630234 | 2.854264  | 5.879598 |
| S    | 12.002715 | 1.038103  | 6.399941 |
| S    | 8.924852  | 1.265963  | 6.107792 |
| P    | 12.094782 | -0.616993 | 3.491528 |
| P    | 9.118249  | -0.126371 | 3.151194 |
| P    | 10.589949 | 4.197188  | 7.841009 |
| P    | 12.301206 | 4.207743  | 5.220320 |
| O    | 10.219953 | -2.414769 | 6.061735 |
| O    | 8.636864  | 4.648735  | 4.757691 |
| C    | 13.191683 | -1.892963 | 4.214924 |
| C    | 12.982040 | -3.256802 | 3.986696 |
| H    | 12.180090 | -3.583333 | 3.330508 |
| C    | 13.784971 | -4.209863 | 4.609952 |
| H    | 13.608540 | -5.265754 | 4.424587 |
| C    | 14.803907 | -3.810304 | 5.469781 |
| H    | 15.429638 | -4.553603 | 5.956045 |
| C    | 15.012877 | -2.453333 | 5.711512 |
| H    | 15.799544 | -2.134989 | 6.389973 |
| C    | 14.210693 | -1.498464 | 5.094246 |
| H    | 14.364581 | -0.444094 | 5.305906 |
| C    | 13.246771 | 0.374642  | 2.447325 |
| C    | 12.775605 | 1.578818  | 1.912176 |
| H    | 11.791216 | 1.940194  | 2.196479 |
| C    | 13.570107 | 2.327704  | 1.047919 |
| H    | 13.196074 | 3.271172  | 0.661557 |
| C    | 14.845525 | 1.880682  | 0.709634 |
| H    | 15.470105 | 2.469369  | 0.043389 |
| C    | 15.321372 | 0.681006  | 1.234342 |
| H    | 16.314819 | 0.326328  | 0.972649 |
| C    | 14.526437 | -0.072122 | 2.096009 |
| H    | 14.905525 | -1.006379 | 2.498385 |
| C    | 11.237285 | -1.500950 | 2.130578 |
| H    | 11.801974 | -2.136343 | 1.448245 |
| C    | 9.937751  | -1.244754 | 1.950451 |
| H    | 9.373664  | -1.677624 | 1.124492 |
| C    | 7.496280  | -0.975949 | 3.364545 |
| C    | 6.628779  | -1.123673 | 2.273677 |
| H    | 6.887650  | -0.686775 | 1.312342 |
| C    | 5.426250  | -1.808191 | 2.413768 |
| H    | 4.763204  | -1.915313 | 1.559606 |
| C    | 5.070561  | -2.347632 | 3.649290 |
| H    | 4.129260  | -2.878896 | 3.760476 |
| C    | 5.920979  | -2.197120 | 4.740456 |
| H    | 5.646301  | -2.607503 | 5.708104 |

|   |           |           |           |
|---|-----------|-----------|-----------|
| C | 7.127680  | -1.514110 | 4.599468  |
| H | 7.780902  | -1.388576 | 5.454507  |
| C | 10.329067 | -1.372431 | 5.558265  |
| C | 11.532035 | 0.237360  | 7.987080  |
| H | 11.576633 | -0.845483 | 7.826592  |
| H | 12.321495 | 0.495169  | 8.701078  |
| C | 10.192341 | 0.640683  | 8.587296  |
| H | 10.064187 | 0.078732  | 9.525466  |
| H | 10.236470 | 1.695675  | 8.868261  |
| C | 8.954482  | 0.411598  | 7.734724  |
| H | 8.076326  | 0.770191  | 8.284356  |
| H | 8.805211  | -0.658730 | 7.550895  |
| C | 9.458163  | 3.935205  | 5.177885  |
| C | 11.532677 | 3.838640  | 9.392743  |
| C | 10.986367 | 3.909107  | 10.679886 |
| H | 9.959822  | 4.233722  | 10.817540 |
| C | 11.748027 | 3.560685  | 11.794055 |
| H | 11.305563 | 3.621951  | 12.784941 |
| C | 13.065790 | 3.138475  | 11.642300 |
| H | 13.658228 | 2.869962  | 12.512674 |
| C | 13.615574 | 3.051886  | 10.364158 |
| H | 14.639087 | 2.712203  | 10.229735 |
| C | 12.853750 | 3.388039  | 9.249567  |
| H | 13.285182 | 3.283152  | 8.257899  |
| C | 8.992089  | 4.858880  | 8.478828  |
| C | 7.812631  | 4.195845  | 8.123274  |
| H | 7.867767  | 3.317022  | 7.485882  |
| C | 6.575149  | 4.665230  | 8.560797  |
| H | 5.668908  | 4.139906  | 8.272321  |
| C | 6.500215  | 5.806323  | 9.353494  |
| H | 5.535286  | 6.175343  | 9.690460  |
| C | 7.668172  | 6.478652  | 9.711753  |
| H | 7.616528  | 7.370876  | 10.330066 |
| C | 8.903678  | 6.007910  | 9.278354  |
| H | 9.805578  | 6.534267  | 9.579971  |
| C | 11.417804 | 5.752209  | 7.318328  |
| H | 11.314736 | 6.657782  | 7.915654  |
| C | 12.144345 | 5.754467  | 6.196142  |
| H | 12.650237 | 6.656388  | 5.850081  |
| C | 14.084885 | 3.816587  | 5.502488  |
| C | 14.848188 | 4.458386  | 6.484657  |
| H | 14.398620 | 5.227964  | 7.105274  |
| C | 16.186544 | 4.118037  | 6.681666  |
| H | 16.762872 | 4.630474  | 7.447500  |
| C | 16.781521 | 3.134548  | 5.897725  |
| H | 17.825192 | 2.872082  | 6.048521  |
| C | 16.030124 | 2.490870  | 4.915465  |
| H | 16.481518 | 1.723840  | 4.292293  |
| C | 14.694006 | 2.825753  | 4.722395  |
| H | 14.123187 | 2.318526  | 3.952442  |

|   |           |          |           |
|---|-----------|----------|-----------|
| C | 12.371521 | 4.922335 | 3.515967  |
| C | 13.440876 | 5.736407 | 3.118649  |
| H | 14.276639 | 5.898351 | 3.794644  |
| C | 13.451430 | 6.330176 | 1.860428  |
| H | 14.287309 | 6.960110 | 1.567809  |
| C | 12.392012 | 6.117351 | 0.978547  |
| H | 12.397615 | 6.585123 | -0.002489 |
| C | 11.329888 | 5.301325 | 1.359573  |
| H | 10.501762 | 5.119623 | 0.680633  |
| C | 11.321080 | 4.704283 | 2.619941  |
| H | 10.492644 | 4.063577 | 2.903885  |
| C | 8.619499  | 1.290047 | 2.092288  |
| C | 7.725012  | 2.230720 | 2.619370  |
| H | 7.339140  | 2.103778 | 3.627560  |
| C | 7.338288  | 3.332733 | 1.864254  |
| H | 6.656076  | 4.061225 | 2.291539  |
| C | 7.832773  | 3.506277 | 0.571524  |
| H | 7.521077  | 4.362918 | -0.020003 |
| C | 8.727143  | 2.578981 | 0.042996  |
| H | 9.117213  | 2.706733 | -0.963381 |
| C | 9.123180  | 1.477415 | 0.801147  |
| H | 9.829116  | 0.765304 | 0.382530  |

---

**Table S17:** Cartesian coordinates of the optimized structure of  $[(\text{Fe}^{\text{I}}\text{Fe}^{\text{I}})\text{adt}]^0$   
 (-4788.20514698  $E_h$ )

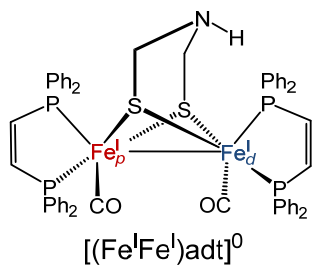

| atom | x         | y         | z         |
|------|-----------|-----------|-----------|
| Fe   | 5.236157  | 4.184566  | 4.510930  |
| Fe   | 4.970985  | 6.243511  | 5.961275  |
| S    | 6.979952  | 5.208321  | 5.558059  |
| S    | 4.837397  | 6.275308  | 3.682349  |
| P    | 5.940559  | 3.139686  | 2.716665  |
| P    | 5.586922  | 2.277559  | 5.643984  |
| P    | 5.566610  | 8.186115  | 6.791459  |
| P    | 2.843321  | 6.916784  | 6.206264  |
| O    | 2.435328  | 3.537600  | 4.150199  |
| O    | 4.827369  | 4.805194  | 8.469565  |
| N    | 7.469047  | 7.311144  | 3.704995  |
| H    | 7.206778  | 8.063847  | 4.334402  |
| C    | 4.928686  | 3.142296  | 1.174093  |
| C    | 3.899498  | 4.073745  | 1.010134  |
| H    | 3.721218  | 4.811688  | 1.786512  |
| C    | 3.121400  | 4.070762  | -0.147013 |
| H    | 2.328157  | 4.804395  | -0.260987 |
| C    | 3.356813  | 3.135334  | -1.149305 |
| H    | 2.745994  | 3.130947  | -2.047997 |
| C    | 4.384481  | 2.204844  | -0.998916 |
| H    | 4.579453  | 1.474950  | -1.779949 |
| C    | 5.166095  | 2.211773  | 0.151337  |
| H    | 5.979569  | 1.496783  | 0.241537  |
| C    | 7.642793  | 3.383144  | 2.035907  |
| C    | 8.738530  | 3.056045  | 2.846215  |
| H    | 8.571763  | 2.653491  | 3.841409  |
| C    | 10.039548 | 3.271766  | 2.403213  |
| H    | 10.876106 | 3.008162  | 3.044616  |
| C    | 10.268241 | 3.836423  | 1.148982  |
| H    | 11.283900 | 4.011952  | 0.805617  |
| C    | 9.187045  | 4.181625  | 0.343624  |
| H    | 9.354476  | 4.629682  | -0.632074 |
| C    | 7.882929  | 3.953808  | 0.780870  |
| H    | 7.049777  | 4.218317  | 0.136785  |
| C    | 5.972929  | 1.343403  | 3.099059  |
| H    | 6.122928  | 0.609191  | 2.308560  |
| C    | 5.795388  | 0.970471  | 4.369270  |
| H    | 5.791246  | -0.080766 | 4.656578  |
| C    | 4.326422  | 1.495624  | 6.739645  |
| C    | 4.520590  | 0.193025  | 7.221955  |
| H    | 5.431489  | -0.348002 | 6.977795  |
| C    | 3.568653  | -0.409135 | 8.035887  |
| H    | 3.731183  | -1.419559 | 8.401478  |
| C    | 2.412148  | 0.287327  | 8.387149  |
| H    | 1.668042  | -0.182245 | 9.025107  |
| C    | 2.219250  | 1.585780  | 7.927868  |

|   |           |           |           |
|---|-----------|-----------|-----------|
| H | 1.330542  | 2.144035  | 8.205902  |
| C | 3.173124  | 2.189173  | 7.108866  |
| H | 3.022643  | 3.206653  | 6.765885  |
| C | 7.104327  | 1.990414  | 6.658231  |
| C | 8.207495  | 1.289491  | 6.160343  |
| H | 8.179864  | 0.874191  | 5.156766  |
| C | 9.343855  | 1.099246  | 6.945804  |
| H | 10.188738 | 0.546023  | 6.544016  |
| C | 9.390104  | 1.605622  | 8.240724  |
| H | 10.273696 | 1.455473  | 8.855131  |
| C | 8.291996  | 2.298801  | 8.747598  |
| H | 8.314856  | 2.691203  | 9.760718  |
| C | 7.157831  | 2.490771  | 7.965318  |
| H | 6.308603  | 3.027869  | 8.375299  |
| C | 3.566627  | 3.787161  | 4.306413  |
| C | 8.057306  | 6.226511  | 4.426392  |
| H | 8.855146  | 6.621952  | 5.062069  |
| C | 6.364507  | 6.970035  | 2.866262  |
| H | 6.027149  | 7.872495  | 2.349052  |
| C | 4.879272  | 5.383641  | 7.455554  |
| C | 6.778156  | 8.282621  | 8.177585  |
| C | 6.911753  | 9.444529  | 8.952993  |
| H | 6.327951  | 10.330164 | 8.715658  |
| C | 7.805478  | 9.489015  | 10.017832 |
| H | 7.895562  | 10.395841 | 10.609764 |
| C | 8.584229  | 8.372788  | 10.321828 |
| H | 9.282256  | 8.407086  | 11.153924 |
| C | 8.464857  | 7.218215  | 9.554956  |
| H | 9.070230  | 6.345357  | 9.782595  |
| C | 7.565376  | 7.170233  | 8.490439  |
| H | 7.475218  | 6.267859  | 7.892139  |
| C | 6.079038  | 9.612629  | 5.724105  |
| C | 7.321486  | 10.250024 | 5.824669  |
| H | 8.026016  | 9.947568  | 6.593399  |
| C | 7.666241  | 11.273093 | 4.941656  |
| H | 8.637248  | 11.752595 | 5.030688  |
| C | 6.774873  | 11.677652 | 3.953014  |
| H | 7.045060  | 12.475326 | 3.266778  |
| C | 5.536277  | 11.045902 | 3.841380  |
| H | 4.835929  | 11.348845 | 3.067807  |
| C | 5.194241  | 10.017554 | 4.712634  |
| H | 4.238411  | 9.512356  | 4.597206  |
| C | 4.083056  | 8.928722  | 7.582355  |
| H | 4.175217  | 9.800952  | 8.228129  |
| C | 2.896793  | 8.373361  | 7.324761  |
| H | 1.973946  | 8.756148  | 7.760561  |
| C | 1.858984  | 7.591105  | 4.797815  |
| C | 1.465281  | 8.934600  | 4.760784  |
| H | 1.731134  | 9.603581  | 5.573396  |
| C | 0.735002  | 9.436468  | 3.685068  |

|   |           |           |           |
|---|-----------|-----------|-----------|
| H | 0.439044  | 10.482094 | 3.679092  |
| C | 0.380911  | 8.601601  | 2.629726  |
| H | -0.193427 | 8.990272  | 1.793277  |
| C | 0.772238  | 7.265211  | 2.652053  |
| H | 0.506554  | 6.604653  | 1.831304  |
| C | 1.514789  | 6.765492  | 3.718260  |
| H | 1.824172  | 5.726528  | 3.705767  |
| C | 1.588614  | 5.919624  | 7.132287  |
| C | 0.498629  | 5.291828  | 6.520457  |
| H | 0.348892  | 5.375921  | 5.450103  |
| C | -0.419128 | 4.568404  | 7.278914  |
| H | -1.262182 | 4.092923  | 6.785330  |
| C | -0.264421 | 4.462612  | 8.659044  |
| H | -0.988146 | 3.907500  | 9.249842  |
| C | 0.823735  | 5.075199  | 9.277109  |
| H | 0.959022  | 4.996296  | 10.352225 |
| C | 1.743896  | 5.794349  | 8.520204  |
| H | 2.587085  | 6.264697  | 9.017411  |
| H | 8.500741  | 5.517857  | 3.720602  |
| H | 6.688742  | 6.240409  | 2.117129  |

---

**Table S18:** Cartesian coordinates of the optimized structure of  $[(\text{Fe}^{\text{II}}\text{Fe}^{\text{I}})\text{adt}]^+$   
 (-4788.03034271  $E_h$ )

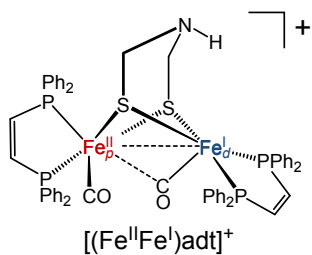

| atom | x         | y         | z         |
|------|-----------|-----------|-----------|
| Fe   | 12.304486 | 3.493007  | 4.261011  |
| Fe   | 13.942596 | 5.491778  | 4.482835  |
| S    | 13.180310 | 4.664203  | 2.484524  |
| S    | 14.487546 | 3.341454  | 4.973996  |
| P    | 10.352667 | 2.963697  | 3.215825  |
| P    | 11.854826 | 1.772796  | 5.631919  |
| P    | 15.929647 | 6.324848  | 3.924779  |
| P    | 13.094637 | 7.588803  | 4.087441  |
| N    | 14.688840 | 2.256841  | 2.378353  |
| O    | 11.006983 | 5.464045  | 5.992057  |
| O    | 14.302568 | 6.108794  | 7.306645  |
| C    | 10.510164 | 2.155590  | 1.575696  |
| C    | 10.153130 | 0.816086  | 1.377822  |
| H    | 9.749628  | 0.229693  | 2.198336  |
| C    | 10.302139 | 0.221074  | 0.126263  |
| H    | 10.019563 | -0.818568 | -0.011055 |
| C    | 10.799720 | 0.958321  | -0.944175 |
| H    | 10.911406 | 0.495214  | -1.919986 |
| C    | 11.149262 | 2.295368  | -0.759840 |
| H    | 11.530929 | 2.878496  | -1.593016 |
| C    | 11.012293 | 2.891088  | 0.490862  |
| H    | 11.293949 | 3.932009  | 0.627138  |
| C    | 8.952418  | 4.138123  | 2.998934  |
| C    | 8.458381  | 4.786255  | 4.140708  |
| H    | 8.935186  | 4.640891  | 5.103983  |
| C    | 7.347122  | 5.619476  | 4.050734  |
| H    | 6.973919  | 6.111313  | 4.944116  |
| C    | 6.712949  | 5.813600  | 2.825388  |
| H    | 5.842948  | 6.460041  | 2.757638  |
| C    | 7.192489  | 5.165845  | 1.689740  |
| H    | 6.694179  | 5.299487  | 0.733703  |
| C    | 8.305696  | 4.331013  | 1.772836  |
| H    | 8.656903  | 3.821090  | 0.882030  |
| C    | 9.520753  | 1.688826  | 4.230815  |
| H    | 8.506258  | 1.386708  | 3.972330  |
| C    | 10.159158 | 1.184225  | 5.290903  |
| H    | 9.695677  | 0.437688  | 5.934004  |
| C    | 11.907451 | 1.885589  | 7.453901  |
| C    | 11.668096 | 4.803243  | 5.291774  |
| C    | 14.330270 | 3.435204  | 1.659666  |
| H    | 13.809645 | 3.146222  | 0.744243  |
| H    | 15.232112 | 3.988533  | 1.389466  |
| C    | 15.394332 | 2.449531  | 3.597554  |
| H    | 16.314085 | 3.010645  | 3.407625  |
| H    | 15.651702 | 1.478788  | 4.027271  |
| C    | 14.163691 | 5.895036  | 6.180042  |

|   |           |           |           |
|---|-----------|-----------|-----------|
| C | 16.599623 | 6.009761  | 2.244781  |
| C | 17.707538 | 5.179307  | 2.040066  |
| H | 18.229881 | 4.747317  | 2.888572  |
| C | 18.157159 | 4.914532  | 0.747676  |
| H | 19.017945 | 4.268999  | 0.600515  |
| C | 17.509768 | 5.479269  | -0.348032 |
| H | 17.864556 | 5.275795  | -1.354017 |
| C | 16.406842 | 6.309445  | -0.150352 |
| H | 15.899680 | 6.754817  | -1.001204 |
| C | 15.949948 | 6.571209  | 1.137455  |
| H | 15.078358 | 7.204377  | 1.278715  |
| C | 15.769074 | 8.145730  | 3.904691  |
| H | 16.662279 | 8.763628  | 3.829432  |
| C | 14.549248 | 8.685013  | 3.962734  |
| H | 14.400718 | 9.764179  | 3.961764  |
| C | 12.138433 | 8.469753  | 5.386671  |
| H | 13.900114 | 1.626886  | 2.501745  |
| C | 12.877486 | 0.292582  | 5.257696  |
| C | 12.654388 | -0.424817 | 4.075244  |
| H | 11.825699 | -0.159575 | 3.423795  |
| C | 13.484887 | -1.487521 | 3.727974  |
| H | 13.297000 | -2.041258 | 2.812716  |
| C | 14.549090 | -1.841295 | 4.555016  |
| H | 15.195225 | -2.671454 | 4.285698  |
| C | 14.778002 | -1.130183 | 5.731384  |
| H | 15.603098 | -1.404956 | 6.382107  |
| C | 13.948944 | -0.067423 | 6.083617  |
| H | 14.133597 | 0.480401  | 7.002394  |
| C | 12.366419 | 3.043235  | 8.086447  |
| C | 12.387712 | 3.122214  | 9.477433  |
| H | 12.746667 | 4.027938  | 9.956564  |
| C | 11.949958 | 2.046973  | 10.244468 |
| H | 11.963417 | 2.110480  | 11.328553 |
| C | 11.497522 | 0.884151  | 9.620938  |
| H | 11.161598 | 0.040362  | 10.216337 |
| C | 11.478759 | 0.800863  | 8.233502  |
| H | 11.145801 | -0.119178 | 7.760061  |
| C | 17.387220 | 6.076531  | 5.008498  |
| C | 17.360634 | 5.161285  | 6.065031  |
| H | 16.475888 | 4.557638  | 6.237779  |
| C | 18.473426 | 5.007146  | 6.890647  |
| H | 18.439058 | 4.292988  | 7.707978  |
| C | 19.619341 | 5.764185  | 6.670466  |
| H | 20.483798 | 5.645725  | 7.317061  |
| C | 19.658810 | 6.673451  | 5.613440  |
| C | 18.552847 | 6.827170  | 4.786017  |
| C | 12.174851 | 7.933418  | 2.543835  |
| C | 12.611807 | 8.894279  | 1.624472  |
| H | 13.520571 | 9.459040  | 1.808352  |
| C | 11.884745 | 9.141185  | 0.462199  |



|   |           |           |           |
|---|-----------|-----------|-----------|
| H | 12.234057 | 9.892452  | -0.240132 |
| C | 10.711006 | 8.436982  | 0.209368  |
| H | 10.140053 | 8.636816  | -0.692698 |
| C | 10.271389 | 7.475465  | 1.116647  |
| H | 9.358111  | 6.919067  | 0.930345  |
| C | 11.003517 | 7.215367  | 2.271568  |
| H | 10.655849 | 6.450409  | 2.960318  |
| C | 12.820694 | 8.915687  | 6.526564  |
| H | 13.890379 | 8.753846  | 6.625502  |
| C | 12.139551 | 9.582220  | 7.540350  |
| H | 12.682669 | 9.927248  | 8.415202  |
| C | 10.769967 | 9.808822  | 7.429514  |
| H | 10.238349 | 10.330570 | 8.219771  |
| C | 10.086833 | 9.370977  | 6.298107  |
| H | 9.020476  | 9.552770  | 6.201097  |
| C | 10.764464 | 8.705714  | 5.280290  |
| H | 10.219059 | 8.384372  | 4.399324  |
| H | 12.711026 | 3.884032  | 7.497428  |
| H | 20.553377 | 7.261798  | 5.432046  |
| H | 18.608383 | 7.522253  | 3.952505  |

---

**Table S19:** Cartesian coordinates of the optimized structure of  $[(\text{Fe}^{\text{I}}\text{Fe}^{\text{I}})\text{adt}-\text{H}]^+$   
 (-4788.62478532  $E_{\text{h}}$ )

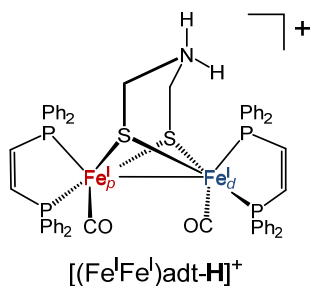

| atom | x         | y         | z         |
|------|-----------|-----------|-----------|
| Fe   | 5.211985  | 4.185860  | 4.488292  |
| Fe   | 4.956720  | 6.266998  | 5.932230  |
| S    | 6.962320  | 5.217254  | 5.509899  |
| S    | 4.749694  | 6.245290  | 3.648955  |
| P    | 5.916842  | 3.122792  | 2.686674  |
| P    | 5.604891  | 2.279164  | 5.650208  |
| P    | 5.566787  | 8.175269  | 6.850385  |
| P    | 2.820090  | 6.966534  | 6.192595  |
| O    | 2.423754  | 3.460992  | 4.161587  |
| O    | 4.730675  | 4.744262  | 8.384249  |
| N    | 7.274808  | 7.347556  | 3.733938  |
| H    | 6.827555  | 7.930986  | 4.462828  |
| C    | 4.877371  | 3.045915  | 1.172832  |
| C    | 3.782702  | 3.900963  | 1.014811  |
| H    | 3.552647  | 4.627788  | 1.786452  |
| C    | 2.992695  | 3.831341  | -0.131849 |
| H    | 2.145160  | 4.501529  | -0.241906 |
| C    | 3.283950  | 2.905564  | -1.128425 |
| H    | 2.663602  | 2.847713  | -2.018016 |
| C    | 4.377395  | 2.052116  | -0.983804 |
| H    | 4.613112  | 1.330226  | -1.760236 |
| C    | 5.170522  | 2.124365  | 0.155660  |
| H    | 6.031666  | 1.467228  | 0.241688  |
| C    | 7.574949  | 3.524391  | 1.979019  |
| C    | 8.723827  | 3.256728  | 2.736649  |
| H    | 8.630378  | 2.781646  | 3.709070  |
| C    | 9.985265  | 3.608618  | 2.263520  |
| H    | 10.865833 | 3.379211  | 2.857081  |
| C    | 10.118618 | 4.249946  | 1.031755  |
| H    | 11.102893 | 4.520822  | 0.661098  |
| C    | 8.983449  | 4.529786  | 0.275500  |
| H    | 9.078495  | 5.018377  | -0.690246 |
| C    | 7.719958  | 4.165678  | 0.741812  |
| H    | 6.845807  | 4.362404  | 0.127492  |
| C    | 6.086741  | 1.351498  | 3.110727  |
| H    | 6.294170  | 0.616545  | 2.334708  |
| C    | 5.917903  | 0.988546  | 4.385012  |
| H    | 5.983789  | -0.056050 | 4.686589  |
| C    | 4.335700  | 1.475636  | 6.706824  |
| C    | 4.545691  | 0.168372  | 7.171435  |
| H    | 5.465691  | -0.358111 | 6.931222  |
| C    | 3.593392  | -0.458884 | 7.965136  |
| H    | 3.765965  | -1.472227 | 8.315899  |
| C    | 2.423380  | 0.215470  | 8.314600  |
| H    | 1.679791  | -0.275128 | 8.936147  |
| C    | 2.216215  | 1.518325  | 7.874493  |

|   |           |           |           |
|---|-----------|-----------|-----------|
| H | 1.316624  | 2.058514  | 8.152810  |
| C | 3.168518  | 2.147894  | 7.074538  |
| H | 3.001886  | 3.168380  | 6.750211  |
| C | 7.107311  | 2.087712  | 6.701642  |
| C | 8.296642  | 1.557476  | 6.189869  |
| H | 8.339263  | 1.207609  | 5.162312  |
| C | 9.425378  | 1.436242  | 6.998143  |
| H | 10.336798 | 1.008962  | 6.589336  |
| C | 9.378314  | 1.842560  | 8.328512  |
| H | 10.255361 | 1.741268  | 8.961212  |
| C | 8.193966  | 2.360914  | 8.849231  |
| H | 8.142013  | 2.661173  | 9.892036  |
| C | 7.064558  | 2.481538  | 8.044884  |
| H | 6.144428  | 2.870052  | 8.468457  |
| C | 3.544505  | 3.738339  | 4.305040  |
| C | 8.001997  | 6.231606  | 4.417291  |
| H | 8.783309  | 6.706748  | 5.016924  |
| C | 6.196204  | 6.934184  | 2.786646  |
| H | 5.892878  | 7.842256  | 2.259414  |
| C | 4.817739  | 5.344908  | 7.390977  |
| C | 6.727797  | 8.212175  | 8.271785  |
| C | 6.911642  | 9.386731  | 9.018157  |
| H | 6.393820  | 10.301079 | 8.739740  |
| C | 7.770936  | 9.401765  | 10.111078 |
| H | 7.901138  | 10.315906 | 10.682893 |
| C | 8.462783  | 8.245076  | 10.470606 |
| H | 9.132427  | 8.257215  | 11.325610 |
| C | 8.293170  | 7.078283  | 9.732087  |
| H | 8.830343  | 6.175065  | 10.005840 |
| C | 7.428155  | 7.058587  | 8.638727  |
| H | 7.299554  | 6.145114  | 8.067503  |
| C | 6.239910  | 9.522276  | 5.767057  |
| C | 7.572982  | 9.954042  | 5.834938  |
| H | 8.217646  | 9.593177  | 6.631373  |
| C | 8.075195  | 10.854539 | 4.894055  |
| H | 9.107920  | 11.184636 | 4.965098  |
| C | 7.252843  | 11.344943 | 3.881867  |
| H | 7.642461  | 12.054117 | 3.157465  |
| C | 5.921306  | 10.930673 | 3.811341  |
| H | 5.270019  | 11.319202 | 3.033471  |
| C | 5.420740  | 10.022110 | 4.739257  |
| H | 4.388992  | 9.686445  | 4.660454  |
| C | 4.083076  | 8.987165  | 7.547193  |
| H | 4.181977  | 9.868499  | 8.178779  |
| C | 2.892698  | 8.452634  | 7.266058  |
| H | 1.967664  | 8.865222  | 7.667790  |
| C | 1.855096  | 7.602251  | 4.759748  |
| C | 1.518751  | 8.958498  | 4.661105  |
| H | 1.813017  | 9.654788  | 5.440409  |
| C | 0.796055  | 9.436001  | 3.569413  |

|   |           |           |           |
|---|-----------|-----------|-----------|
| H | 0.538735  | 10.490039 | 3.516414  |
| C | 0.393781  | 8.565193  | 2.561408  |
| H | -0.178392 | 8.935134  | 1.715685  |
| C | 0.728165  | 7.215687  | 2.645636  |
| H | 0.418393  | 6.527239  | 1.864653  |
| C | 1.461729  | 6.738305  | 3.727867  |
| H | 1.722853  | 5.686111  | 3.763433  |
| C | 1.592454  | 5.980963  | 7.154327  |
| C | 0.499722  | 5.332761  | 6.569118  |
| H | 0.325513  | 5.400743  | 5.501633  |
| C | -0.396297 | 4.612177  | 7.355747  |
| H | -1.243780 | 4.121747  | 6.885829  |
| C | -0.216373 | 4.532536  | 8.734490  |
| H | -0.924205 | 3.980988  | 9.346632  |
| C | 0.870761  | 5.172571  | 9.325836  |
| H | 1.019442  | 5.119541  | 10.400324 |
| C | 1.769985  | 5.889077  | 8.542369  |
| H | 2.609725  | 6.384439  | 9.021108  |
| H | 8.461316  | 5.616261  | 3.639673  |
| H | 6.633390  | 6.223886  | 2.080888  |
| H | 7.950799  | 7.950864  | 3.253548  |

---

**Table S20:** Cartesian coordinates of the optimized structure of  $[t\mathbf{H}-(\text{Fe}^{\text{II}}\text{Fe}^{\text{II}})\text{adt}]^+$   
 (-4788.64475156  $E_h$ )

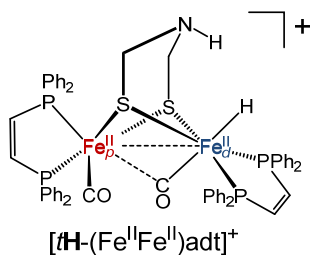

| atom | x         | y         | z         |
|------|-----------|-----------|-----------|
| Fe   | 12.395358 | 3.324029  | 4.129008  |
| Fe   | 14.026934 | 5.341232  | 4.384241  |
| S    | 13.223283 | 4.580207  | 2.396097  |
| S    | 14.585914 | 3.186047  | 4.749359  |
| P    | 10.456384 | 2.921823  | 3.099933  |
| P    | 11.879247 | 1.716225  | 5.567098  |
| P    | 15.972774 | 6.246286  | 3.802564  |
| P    | 13.114378 | 7.435744  | 4.103601  |
| N    | 14.818044 | 2.244853  | 2.090580  |
| O    | 11.217225 | 5.242587  | 5.981300  |
| O    | 14.508176 | 5.833248  | 7.219675  |
| C    | 10.627899 | 2.422253  | 1.347441  |
| C    | 10.633625 | 1.068985  | 0.991542  |
| H    | 10.480064 | 0.304705  | 1.748761  |
| C    | 10.835735 | 0.686850  | -0.333176 |
| H    | 10.832992 | -0.367088 | -0.595459 |
| C    | 11.033858 | 1.652588  | -1.316143 |
| H    | 11.188302 | 1.355061  | -2.349060 |
| C    | 11.030539 | 3.003052  | -0.970051 |
| H    | 11.182899 | 3.761405  | -1.732611 |
| C    | 10.833083 | 3.389210  | 0.353261  |
| H    | 10.844125 | 4.444174  | 0.611206  |
| C    | 8.945619  | 3.982695  | 3.118001  |
| C    | 8.547751  | 4.544658  | 4.339742  |
| H    | 9.153659  | 4.408838  | 5.228710  |
| C    | 7.367848  | 5.277695  | 4.430095  |
| H    | 7.074893  | 5.704494  | 5.384813  |
| C    | 6.565448  | 5.456520  | 3.305431  |
| H    | 5.644078  | 6.026964  | 3.377013  |
| C    | 6.944380  | 4.889678  | 2.091209  |
| H    | 6.316297  | 5.009888  | 1.213038  |
| C    | 8.124540  | 4.154215  | 1.995778  |
| H    | 8.395936  | 3.706277  | 1.045820  |
| C    | 9.741467  | 1.441248  | 3.901775  |
| H    | 8.819723  | 1.021058  | 3.500547  |
| C    | 10.322656 | 0.952123  | 5.000458  |
| H    | 9.919194  | 0.087272  | 5.524984  |
| C    | 11.584909 | 2.128926  | 7.322805  |
| C    | 11.821125 | 4.603338  | 5.217120  |
| C    | 14.381885 | 3.446127  | 1.458395  |
| H    | 13.830040 | 3.189893  | 0.551203  |
| H    | 15.244844 | 4.055835  | 1.184320  |
| C    | 15.513624 | 2.397653  | 3.318770  |
| H    | 16.411601 | 3.003570  | 3.167961  |
| H    | 15.805729 | 1.415374  | 3.696815  |
| C    | 14.315168 | 5.671705  | 6.093813  |

|   |           |           |           |
|---|-----------|-----------|-----------|
| C | 16.611866 | 6.009149  | 2.097991  |
| C | 17.731956 | 5.210444  | 1.840644  |
| H | 18.277330 | 4.753925  | 2.661335  |
| C | 18.164221 | 5.009280  | 0.531012  |
| H | 19.033911 | 4.386937  | 0.342535  |
| C | 17.488109 | 5.607463  | -0.528918 |
| H | 17.829261 | 5.453236  | -1.548238 |
| C | 16.373736 | 6.407608  | -0.278477 |
| H | 15.844480 | 6.878819  | -1.101451 |
| C | 15.933845 | 6.605489  | 1.026413  |
| H | 15.053619 | 7.215711  | 1.208875  |
| C | 15.765498 | 8.061772  | 3.835152  |
| H | 16.639332 | 8.704521  | 3.743642  |
| C | 14.534354 | 8.568662  | 3.933127  |
| H | 14.358978 | 9.643581  | 3.953180  |
| C | 12.221094 | 8.259298  | 5.483590  |
| H | 12.566797 | 2.059480  | 3.322626  |
| H | 14.035761 | 1.605192  | 2.208999  |
| C | 12.996534 | 0.257445  | 5.617426  |
| C | 13.178955 | -0.483772 | 4.441846  |
| H | 12.659985 | -0.191503 | 3.532178  |
| C | 14.010016 | -1.599040 | 4.431531  |
| H | 14.136239 | -2.169564 | 3.515830  |
| C | 14.675114 | -1.984518 | 5.594906  |
| H | 15.325798 | -2.853954 | 5.587363  |
| C | 14.495457 | -1.255864 | 6.766714  |
| H | 15.004580 | -1.554719 | 7.678315  |
| C | 13.656552 | -0.142745 | 6.782455  |
| H | 13.516466 | 0.408801  | 7.706225  |
| C | 12.583263 | 2.828004  | 8.015440  |
| C | 12.399395 | 3.182304  | 9.347823  |
| H | 13.181009 | 3.723120  | 9.872819  |
| C | 11.211701 | 2.855421  | 9.999965  |
| H | 11.065564 | 3.137974  | 11.038275 |
| C | 10.210525 | 2.171766  | 9.315979  |
| H | 9.281307  | 1.918940  | 9.818073  |
| C | 10.394949 | 1.806766  | 7.984080  |
| H | 9.601187  | 1.277696  | 7.466152  |
| C | 17.460472 | 5.987981  | 4.840888  |
| C | 17.495309 | 4.994085  | 5.823677  |
| H | 16.637221 | 4.346272  | 5.971047  |
| C | 18.634477 | 4.819529  | 6.608042  |
| H | 18.648340 | 4.043516  | 7.367503  |
| C | 19.745630 | 5.634920  | 6.420174  |
| H | 20.630666 | 5.500628  | 7.034994  |
| C | 19.724136 | 6.622617  | 5.435558  |
| C | 18.592250 | 6.796107  | 4.648050  |
| C | 12.093240 | 7.794421  | 2.629625  |
| C | 12.458075 | 8.770260  | 1.695511  |
| H | 13.371900 | 9.342183  | 1.825212  |

|   |           |           |           |
|---|-----------|-----------|-----------|
| C | 11.650819 | 9.023770  | 0.588501  |
| H | 11.944488 | 9.786763  | -0.126492 |
| C | 10.468293 | 8.312232  | 0.407392  |
| H | 9.834640  | 8.519096  | -0.450070 |
| C | 10.099352 | 7.335384  | 1.330461  |
| H | 9.177663  | 6.775404  | 1.202250  |
| C | 10.912412 | 7.068243  | 2.428288  |
| H | 10.618377 | 6.293154  | 3.130340  |
| C | 12.959716 | 8.654395  | 6.607118  |
| H | 14.032138 | 8.486178  | 6.647270  |
| C | 12.331816 | 9.279461  | 7.679806  |
| H | 12.918263 | 9.584781  | 8.541307  |
| C | 10.959762 | 9.515551  | 7.644799  |
| H | 10.469587 | 10.004868 | 8.481224  |
| C | 10.220934 | 9.129531  | 6.529762  |
| H | 9.152304  | 9.319534  | 6.491401  |
| C | 10.845241 | 8.505940  | 5.453024  |
| H | 10.256079 | 8.225882  | 4.586408  |
| H | 13.507663 | 3.096102  | 7.509877  |
| H | 20.591802 | 7.256465  | 5.278643  |
| H | 18.602437 | 7.5525    | 3.868096  |

---

**Table S21:** Cartesian coordinates of the optimized structure of  $[t\mathbf{H}-(\text{Fe}^{\text{I}}\text{Fe}^{\text{II}})\text{adt}]^0$   
 (-4788.81184262  $E_h$ )

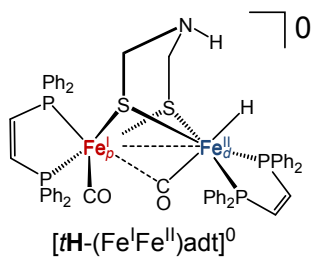

| atom | x         | y         | z         |
|------|-----------|-----------|-----------|
| Fe   | 12.188181 | 3.224418  | 4.213202  |
| Fe   | 14.098443 | 5.494543  | 4.470433  |
| S    | 13.136526 | 4.574367  | 2.559556  |
| S    | 14.382627 | 3.268375  | 5.011610  |
| P    | 10.359227 | 2.779077  | 3.087057  |
| P    | 11.692022 | 1.584578  | 5.567118  |
| P    | 16.111773 | 6.331851  | 3.732083  |
| P    | 13.270434 | 7.553183  | 4.133733  |
| N    | 14.808334 | 2.268444  | 2.390841  |
| O    | 10.994506 | 5.298982  | 5.899640  |
| O    | 14.552956 | 6.009184  | 7.295856  |
| C    | 10.576427 | 2.318847  | 1.325443  |
| C    | 10.525636 | 0.982927  | 0.913375  |
| H    | 10.304538 | 0.200150  | 1.633880  |
| C    | 10.766835 | 0.639627  | -0.415259 |
| H    | 10.723593 | -0.402996 | -0.718162 |
| C    | 11.062263 | 1.628619  | -1.349416 |
| H    | 11.251564 | 1.361792  | -2.385434 |
| C    | 11.118390 | 2.962136  | -0.948164 |
| H    | 11.355200 | 3.739488  | -1.669299 |
| C    | 10.881191 | 3.308414  | 0.379710  |
| H    | 10.952693 | 4.347894  | 0.685475  |
| C    | 8.830990  | 3.825328  | 3.058409  |
| C    | 8.370540  | 4.333889  | 4.281071  |
| H    | 8.928402  | 4.144957  | 5.192234  |
| C    | 7.201572  | 5.086631  | 4.342943  |
| H    | 6.863829  | 5.473364  | 5.300282  |
| C    | 6.472605  | 5.345385  | 3.184218  |
| H    | 5.562123  | 5.936337  | 3.231632  |
| C    | 6.915804  | 4.838348  | 1.965494  |
| H    | 6.348878  | 5.026026  | 1.057433  |
| C    | 8.084178  | 4.080258  | 1.901892  |
| H    | 8.409942  | 3.683189  | 0.946077  |
| C    | 9.621565  | 1.270667  | 3.828065  |
| H    | 8.721193  | 0.840065  | 3.389850  |
| C    | 10.175123 | 0.770506  | 4.937297  |
| H    | 9.764352  | -0.112370 | 5.425153  |
| C    | 11.333807 | 1.886876  | 7.344136  |
| C    | 11.568982 | 4.547309  | 5.220777  |
| C    | 14.372510 | 3.450465  | 1.711051  |
| H    | 13.896481 | 3.152003  | 0.773364  |
| H    | 15.235966 | 4.078674  | 1.481759  |
| C    | 15.413905 | 2.462024  | 3.668358  |
| H    | 16.306059 | 3.087899  | 3.562692  |
| H    | 15.708189 | 1.488515  | 4.069346  |
| C    | 14.370135 | 5.845829  | 6.155859  |



|   |           |           |           |
|---|-----------|-----------|-----------|
| C | 16.725487 | 6.116039  | 2.003850  |
| C | 17.835630 | 5.318594  | 1.698908  |
| H | 18.419900 | 4.874814  | 2.499789  |
| C | 18.202091 | 5.090211  | 0.374385  |
| H | 19.065744 | 4.467616  | 0.156731  |
| C | 17.467518 | 5.655155  | -0.665111 |
| H | 17.754798 | 5.476545  | -1.697555 |
| C | 16.359055 | 6.447876  | -0.372265 |
| H | 15.776457 | 6.889901  | -1.176085 |
| C | 15.987832 | 6.673655  | 0.949613  |
| H | 15.110001 | 7.277589  | 1.163498  |
| C | 15.920526 | 8.160600  | 3.735655  |
| H | 16.790709 | 8.803482  | 3.602843  |
| C | 14.696206 | 8.680215  | 3.871295  |
| H | 14.534767 | 9.758473  | 3.874889  |
| C | 12.427880 | 8.478730  | 5.493551  |
| H | 12.515641 | 1.981972  | 3.379268  |
| H | 14.012361 | 1.641656  | 2.501719  |
| C | 12.856664 | 0.160030  | 5.633973  |
| C | 12.994231 | -0.655504 | 4.503827  |
| H | 12.398419 | -0.450867 | 3.617810  |
| C | 13.890320 | -1.719803 | 4.504229  |
| H | 13.983293 | -2.346889 | 3.621698  |
| C | 14.669848 | -1.975877 | 5.631324  |
| H | 15.373765 | -2.803509 | 5.630778  |
| C | 14.543189 | -1.165886 | 6.756260  |
| H | 15.149857 | -1.356709 | 7.637199  |
| C | 13.638733 | -0.105509 | 6.761178  |
| H | 13.545992 | 0.518607  | 7.644335  |
| C | 12.063294 | 2.884858  | 8.002480  |
| C | 11.845699 | 3.144492  | 9.353362  |
| H | 12.420093 | 3.923251  | 9.846380  |
| C | 10.889706 | 2.419206  | 10.059764 |
| H | 10.713294 | 2.628458  | 11.111258 |
| C | 10.157176 | 1.425721  | 9.413493  |
| H | 9.409073  | 0.856675  | 9.958755  |
| C | 10.381743 | 1.156526  | 8.066233  |
| H | 9.806809  | 0.372571  | 7.583029  |
| C | 17.658453 | 6.119953  | 4.709420  |
| C | 17.668873 | 5.172929  | 5.738543  |
| H | 16.776321 | 4.582138  | 5.927984  |
| C | 18.811052 | 4.987191  | 6.516793  |
| H | 18.804340 | 4.248246  | 7.313148  |
| C | 19.950994 | 5.748075  | 6.276992  |
| H | 20.839666 | 5.606605  | 6.886175  |
| C | 19.952788 | 6.692453  | 5.250083  |
| C | 18.816020 | 6.874091  | 4.469694  |
| C | 12.190985 | 7.910122  | 2.688899  |
| C | 12.510004 | 8.871484  | 1.724201  |
| H | 13.424311 | 9.450824  | 1.813506  |

|   |           |           |           |
|---|-----------|-----------|-----------|
| C | 11.664956 | 9.096525  | 0.638835  |
| H | 11.928923 | 9.847278  | -0.101302 |
| C | 10.484682 | 8.370098  | 0.508696  |
| H | 9.822460  | 8.551686  | -0.333534 |
| C | 10.158030 | 7.406673  | 1.461377  |
| H | 9.242041  | 6.829282  | 1.370392  |
| C | 11.011504 | 7.168458  | 2.535212  |
| H | 10.756164 | 6.399186  | 3.258512  |
| C | 13.200816 | 8.900881  | 6.583540  |
| H | 14.267814 | 8.698636  | 6.603880  |
| C | 12.615987 | 9.578657  | 7.648793  |
| H | 13.232705 | 9.899156  | 8.483988  |
| C | 11.248120 | 9.840805  | 7.645058  |
| H | 10.790209 | 10.368259 | 8.477381  |
| C | 10.471914 | 9.423517  | 6.567464  |
| H | 9.404183  | 9.625139  | 6.553413  |
| C | 11.056158 | 8.749072  | 5.498268  |
| H | 10.437304 | 8.442224  | 4.661584  |
| H | 12.806067 | 3.460472  | 7.457885  |
| H | 20.842761 | 7.285123  | 5.055835  |
| H | 18.836597 | 7.596123  | 3.657172  |

---

**Table S22:** Cartesian coordinates of the optimized structure of *sym*-[ $\mu$ H-(Fe<sup>II</sup>Fe<sup>II</sup>)adt]<sup>+</sup> (-4788.66309126 *E<sub>h</sub>*)

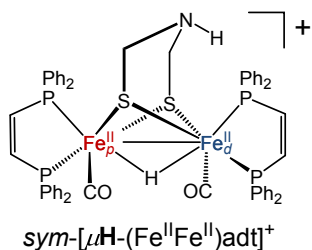

| atom | x         | y         | z         |
|------|-----------|-----------|-----------|
| Fe   | 5.135294  | 4.124930  | 4.498327  |
| Fe   | 4.961012  | 6.181140  | 6.102054  |
| S    | 6.920521  | 5.075616  | 5.599829  |
| S    | 4.771795  | 6.283035  | 3.804877  |
| P    | 6.068021  | 3.178300  | 2.683183  |
| P    | 5.419656  | 2.122881  | 5.535578  |
| P    | 5.618717  | 8.254873  | 6.698270  |
| P    | 2.832075  | 6.916961  | 6.482901  |
| O    | 2.504062  | 3.285974  | 3.593892  |
| O    | 5.223360  | 5.243522  | 8.838800  |
| N    | 7.452801  | 7.209473  | 3.796523  |
| H    | 7.306259  | 8.012227  | 4.397296  |
| C    | 5.236352  | 3.341287  | 1.056569  |
| C    | 4.252419  | 4.312071  | 0.846022  |
| H    | 3.982221  | 4.992095  | 1.648349  |
| C    | 3.624451  | 4.419875  | -0.393942 |
| H    | 2.863726  | 5.179955  | -0.545434 |
| C    | 3.968459  | 3.558924  | -1.430887 |
| H    | 3.474690  | 3.640925  | -2.394685 |
| C    | 4.953790  | 2.591925  | -1.232601 |
| H    | 5.231466  | 1.921407  | -2.040430 |
| C    | 5.587056  | 2.486134  | 0.000102  |
| H    | 6.370951  | 1.744894  | 0.129420  |
| C    | 7.839756  | 3.420877  | 2.257109  |
| C    | 8.822714  | 2.934233  | 3.128795  |
| H    | 8.536417  | 2.409534  | 4.035123  |
| C    | 10.171047 | 3.141858  | 2.855804  |
| H    | 10.923101 | 2.755493  | 3.537467  |
| C    | 10.554141 | 3.846926  | 1.715651  |
| H    | 11.606676 | 4.010364  | 1.504273  |
| C    | 9.582941  | 4.341123  | 0.849251  |
| H    | 9.874135  | 4.891966  | -0.040183 |
| C    | 8.231573  | 4.127972  | 1.114501  |
| H    | 7.484721  | 4.505011  | 0.422473  |
| C    | 6.000344  | 1.371701  | 2.971810  |
| H    | 6.199818  | 0.689404  | 2.147192  |
| C    | 5.711264  | 0.917377  | 4.194399  |
| H    | 5.659066  | -0.150390 | 4.403007  |
| C    | 4.036918  | 1.368200  | 6.472985  |
| C    | 4.138130  | 0.034635  | 6.896351  |
| H    | 5.038523  | -0.538377 | 6.690464  |
| C    | 3.101114  | -0.559169 | 7.604914  |
| H    | 3.188595  | -1.593506 | 7.924135  |
| C    | 1.955888  | 0.175686  | 7.911621  |
| H    | 1.147042  | -0.288334 | 8.468488  |
| C    | 1.855626  | 1.504134  | 7.512096  |

|   |          |           |           |
|---|----------|-----------|-----------|
| H | 0.976132 | 2.089468  | 7.760652  |
| C | 2.891453 | 2.099943  | 6.794074  |
| H | 2.805910 | 3.140024  | 6.496872  |
| C | 6.830656 | 1.799277  | 6.664539  |
| C | 7.944210 | 1.051123  | 6.269010  |
| H | 7.991450 | 0.623719  | 5.271214  |
| C | 8.994010 | 0.825126  | 7.157973  |
| H | 9.847817 | 0.232613  | 6.841929  |
| C | 8.940797 | 1.343917  | 8.448071  |
| H | 9.757039 | 1.164133  | 9.141524  |
| C | 7.829927 | 2.083517  | 8.851348  |
| H | 7.775741 | 2.482074  | 9.860168  |
| C | 6.780140 | 2.308693  | 7.967655  |
| H | 5.914412 | 2.871974  | 8.301486  |
| C | 3.558913 | 3.608477  | 3.941553  |
| C | 8.018690 | 6.103089  | 4.487790  |
| H | 8.821029 | 6.463969  | 5.136304  |
| C | 6.315406 | 6.959818  | 2.983559  |
| H | 5.998393 | 7.897226  | 2.521853  |
| C | 5.107633 | 5.642469  | 7.760403  |
| C | 6.999918 | 8.455937  | 7.885961  |
| C | 7.181202 | 9.668086  | 8.571303  |
| H | 6.525839 | 10.513214 | 8.379005  |
| C | 8.215435 | 9.811786  | 9.489126  |
| H | 8.343109 | 10.754048 | 10.013666 |
| C | 9.085450 | 8.749455  | 9.733390  |
| H | 9.892162 | 8.862926  | 10.451530 |
| C | 8.917159 | 7.546413  | 9.055508  |
| H | 9.591186 | 6.715499  | 9.241245  |
| C | 7.878932 | 7.397257  | 8.137366  |
| H | 7.750280 | 6.451475  | 7.618542  |
| C | 5.909552 | 9.580402  | 5.449150  |
| C | 7.104590 | 10.307406 | 5.378075  |
| H | 7.905147 | 10.115117 | 6.085628  |
| C | 7.275631 | 11.284167 | 4.397905  |
| H | 8.208443 | 11.838247 | 4.351914  |
| C | 6.257395 | 11.550233 | 3.487454  |
| H | 6.391792 | 12.314699 | 2.728034  |
| C | 5.064583 | 10.830528 | 3.552419  |
| H | 4.265269 | 11.032095 | 2.845274  |
| C | 4.891952 | 9.847787  | 4.521519  |
| H | 3.963258 | 9.284475  | 4.549928  |
| C | 4.211380 | 8.981364  | 7.618397  |
| H | 4.362937 | 9.883620  | 8.208285  |
| C | 3.009135 | 8.409167  | 7.519063  |
| H | 2.138830 | 8.806871  | 8.039563  |
| C | 1.766254 | 7.497190  | 5.107736  |
| C | 1.277782 | 8.808956  | 5.065250  |
| H | 1.535618 | 9.517499  | 5.846274  |
| C | 0.456681 | 9.223999  | 4.018992  |

|   |           |           |           |
|---|-----------|-----------|-----------|
| H | 0.083522  | 10.243838 | 4.002708  |
| C | 0.107823  | 8.333927  | 3.007158  |
| H | -0.538495 | 8.656637  | 2.196311  |
| C | 0.591358  | 7.027883  | 3.039183  |
| H | 0.325722  | 6.326464  | 2.253826  |
| C | 1.422919  | 6.614052  | 4.075519  |
| H | 1.797791  | 5.596679  | 4.076506  |
| C | 1.684304  | 5.924430  | 7.526080  |
| C | 0.526227  | 5.326668  | 7.017028  |
| H | 0.269651  | 5.430990  | 5.968203  |
| C | -0.330816 | 4.621876  | 7.860356  |
| H | -1.234015 | 4.176978  | 7.452595  |
| C | -0.043141 | 4.505444  | 9.218107  |
| H | -0.718658 | 3.965445  | 9.875078  |
| C | 1.109477  | 5.095414  | 9.732258  |
| H | 1.339036  | 5.016503  | 10.790722 |
| C | 1.967612  | 5.800114  | 8.893823  |
| H | 2.852665  | 6.266262  | 9.316085  |
| H | 8.445842  | 5.394166  | 3.775696  |
| H | 6.569668  | 6.248682  | 2.191949  |
| H | 4.334629  | 4.673891  | 5.838514  |

---

**Table S23:** Cartesian coordinates of the optimized structure of *sym*-[ $\mu$ H-(Fe<sup>1.5</sup>Fe<sup>1.5</sup>)adt]<sup>0</sup> (-4788.81452017 *E<sub>h</sub>*)

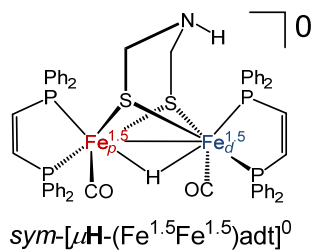

| atom | x         | y         | z         |
|------|-----------|-----------|-----------|
| Fe   | 5.119535  | 4.075973  | 4.454549  |
| Fe   | 4.950370  | 6.214133  | 6.159062  |
| S    | 6.916772  | 5.033302  | 5.619210  |
| S    | 4.708219  | 6.281497  | 3.824565  |
| P    | 6.144190  | 3.171160  | 2.631933  |
| P    | 5.366868  | 2.085206  | 5.418698  |
| P    | 5.606856  | 8.371203  | 6.697875  |
| P    | 2.859036  | 6.923129  | 6.599835  |
| O    | 2.493117  | 3.341047  | 3.481397  |
| O    | 5.315197  | 5.289791  | 8.882423  |
| N    | 7.396606  | 7.186886  | 3.815779  |
| H    | 7.205181  | 7.936725  | 4.471925  |
| C    | 5.407666  | 3.372713  | 0.956368  |
| C    | 4.443501  | 4.363250  | 0.745767  |
| H    | 4.155496  | 5.013736  | 1.567896  |
| C    | 3.857907  | 4.521858  | -0.509876 |
| H    | 3.111490  | 5.297057  | -0.658772 |
| C    | 4.224543  | 3.691574  | -1.564076 |
| H    | 3.764366  | 3.813262  | -2.540895 |
| C    | 5.188181  | 2.702773  | -1.365488 |
| H    | 5.482528  | 2.054459  | -2.186342 |
| C    | 5.777457  | 2.546935  | -0.115668 |
| H    | 6.544211  | 1.788354  | 0.019458  |
| C    | 7.950641  | 3.292033  | 2.278142  |
| C    | 8.850237  | 2.796457  | 3.232459  |
| H    | 8.477190  | 2.317590  | 4.133025  |
| C    | 10.222382 | 2.940549  | 3.053260  |
| H    | 10.904352 | 2.551362  | 3.804232  |
| C    | 10.718327 | 3.590148  | 1.924224  |
| H    | 11.789747 | 3.706660  | 1.787174  |
| C    | 9.832145  | 4.095755  | 0.976420  |
| H    | 10.208911 | 4.609565  | 0.096231  |
| C    | 8.457767  | 3.948696  | 1.150290  |
| H    | 7.778720  | 4.347570  | 0.402753  |
| C    | 5.986092  | 1.353674  | 2.863946  |
| H    | 6.175663  | 0.682677  | 2.026661  |
| C    | 5.645205  | 0.880122  | 4.066556  |
| H    | 5.540258  | -0.190161 | 4.242433  |
| C    | 3.968721  | 1.322739  | 6.342708  |
| C    | 4.016523  | -0.028170 | 6.713966  |
| H    | 4.889010  | -0.629795 | 6.471391  |
| C    | 2.966385  | -0.604889 | 7.418522  |
| H    | 3.014357  | -1.654118 | 7.697153  |
| C    | 1.860039  | 0.165986  | 7.775323  |
| H    | 1.041490  | -0.283486 | 8.331064  |
| C    | 1.812487  | 1.512159  | 7.428281  |

|   |          |           |           |
|---|----------|-----------|-----------|
| H | 0.965999 | 2.127510  | 7.717855  |
| C | 2.861249 | 2.088665  | 6.712793  |
| H | 2.824973 | 3.141820  | 6.453147  |
| C | 6.753044 | 1.695737  | 6.566645  |
| C | 7.782585 | 0.809917  | 6.233454  |
| H | 7.788466 | 0.319925  | 5.263433  |
| C | 8.808481 | 0.543197  | 7.139821  |
| H | 9.598965 | -0.151430 | 6.868059  |
| C | 8.814479 | 1.158099  | 8.387887  |
| H | 9.612823 | 0.949797  | 9.094937  |
| C | 7.790652 | 2.041478  | 8.727398  |
| H | 7.787725 | 2.529547  | 9.697850  |
| C | 6.767888 | 2.310373  | 7.824684  |
| H | 5.980708 | 3.003879  | 8.103350  |
| C | 3.558201 | 3.615034  | 3.863935  |
| C | 7.972376 | 6.052806  | 4.468637  |
| H | 8.815186 | 6.396055  | 5.075827  |
| C | 6.249458 | 6.940129  | 3.002970  |
| H | 5.947890 | 7.880378  | 2.534068  |
| C | 5.146810 | 5.679513  | 7.795560  |
| C | 7.010856 | 8.668972  | 7.850984  |
| C | 7.199642 | 9.889682  | 8.515852  |
| H | 6.525167 | 10.721845 | 8.330195  |
| C | 8.259690 | 10.057935 | 9.400603  |
| H | 8.393563 | 11.008753 | 9.909486  |
| C | 9.149289 | 9.008595  | 9.631367  |
| H | 9.976753 | 9.140381  | 10.323277 |
| C | 8.973731 | 7.794831  | 8.974245  |
| H | 9.662056 | 6.973031  | 9.150678  |
| C | 7.909137 | 7.623272  | 8.090121  |
| H | 7.765311 | 6.670427  | 7.585770  |
| C | 5.814882 | 9.715212  | 5.448041  |
| C | 6.998333 | 10.448352 | 5.289009  |
| H | 7.830045 | 10.291495 | 5.969256  |
| C | 7.120491 | 11.383510 | 4.262511  |
| H | 8.046741 | 11.941411 | 4.154584  |
| C | 6.064890 | 11.603433 | 3.382435  |
| H | 6.161477 | 12.334197 | 2.584331  |
| C | 4.885530 | 10.873155 | 3.526759  |
| H | 4.057466 | 11.030012 | 2.840886  |
| C | 4.763324 | 9.931559  | 4.542943  |
| H | 3.847556 | 9.352831  | 4.626513  |
| C | 4.205472 | 9.061484  | 7.664009  |
| H | 4.341499 | 9.964822  | 8.257935  |
| C | 3.021615 | 8.441993  | 7.614159  |
| H | 2.160869 | 8.812376  | 8.171070  |
| C | 1.722283 | 7.474153  | 5.260033  |
| C | 1.192086 | 8.769100  | 5.215001  |
| H | 1.450367 | 9.490926  | 5.984013  |
| C | 0.336564 | 9.151477  | 4.183474  |

|   |           |           |           |
|---|-----------|-----------|-----------|
| H | -0.064228 | 10.161432 | 4.165096  |
| C | -0.008685 | 8.242502  | 3.187181  |
| H | -0.679787 | 8.539336  | 2.385845  |
| C | 0.515284  | 6.952156  | 3.220652  |
| H | 0.260475  | 6.235975  | 2.444656  |
| C | 1.382618  | 6.573715  | 4.241500  |
| H | 1.795945  | 5.570974  | 4.238805  |
| C | 1.716359  | 5.961283  | 7.691957  |
| C | 0.531103  | 5.375014  | 7.234466  |
| H | 0.233274  | 5.485410  | 6.196858  |
| C | -0.293622 | 4.667960  | 8.108097  |
| H | -1.215899 | 4.230166  | 7.735179  |
| C | 0.052139  | 4.535729  | 9.450653  |
| H | -0.594788 | 3.989478  | 10.131576 |
| C | 1.231733  | 5.113267  | 9.915387  |
| H | 1.512859  | 5.017585  | 10.960480 |
| C | 2.057127  | 5.818177  | 9.044693  |
| H | 2.973481  | 6.259596  | 9.424156  |
| H | 8.357000  | 5.364471  | 3.712631  |
| H | 6.513904  | 6.226503  | 2.214304  |
| H | 4.361605  | 4.590526  | 5.76707   |

---



**Table S24:** Cartesian coordinates of the optimized structure of *unsym*-[ $\mu$ H-(Fe<sup>II</sup>Fe<sup>II</sup>)adt]<sup>+</sup> (-4788.66283980 E<sub>h</sub>)

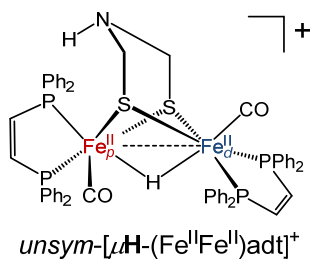

| atom | x         | y         | z        |
|------|-----------|-----------|----------|
| Fe   | 4.635587  | 13.824517 | 3.824910 |
| Fe   | 5.838108  | 11.464927 | 3.754654 |
| H    | 5.344078  | 12.640031 | 4.829002 |
| S    | 3.729376  | 11.931754 | 2.934450 |
| S    | 6.458247  | 13.322471 | 2.561781 |
| P    | 2.870996  | 14.248857 | 5.183904 |
| P    | 5.154296  | 9.869118  | 5.209521 |
| P    | 5.669086  | 15.522294 | 4.900766 |
| P    | 6.590490  | 9.757125  | 2.467678 |
| O    | 3.493144  | 15.579487 | 1.825153 |
| O    | 8.503603  | 11.462633 | 4.913443 |
| C    | 3.732451  | 12.167637 | 1.073018 |
| C    | 5.901568  | 13.239398 | 0.775106 |
| C    | 7.431515  | 11.468153 | 4.483438 |
| C    | 3.942815  | 14.910843 | 2.655400 |
| C    | 6.439198  | 16.847776 | 3.888309 |
| C    | 5.591882  | 17.741398 | 3.218415 |
| H    | 4.514309  | 17.665024 | 3.332568 |
| C    | 6.118714  | 18.742206 | 2.408044 |
| H    | 5.449070  | 19.430290 | 1.900585 |
| C    | 7.497702  | 18.860764 | 2.251697 |
| H    | 7.909449  | 19.641692 | 1.619343 |
| C    | 8.345807  | 17.979264 | 2.916345 |
| H    | 9.422437  | 18.071359 | 2.807409 |
| C    | 7.822612  | 16.979012 | 3.731885 |
| H    | 8.500921  | 16.315588 | 4.256856 |
| C    | 6.895495  | 15.168688 | 6.213367 |
| C    | 6.702483  | 15.577524 | 7.538417 |
| H    | 5.806698  | 16.121743 | 7.820876 |
| C    | 7.657055  | 15.287257 | 8.510869 |
| H    | 7.497863  | 15.617166 | 9.533424 |
| C    | 8.813272  | 14.587916 | 8.172292 |
| H    | 9.561897  | 14.373004 | 8.929385 |
| C    | 9.007781  | 14.166659 | 6.857814 |
| H    | 9.899918  | 13.610896 | 6.586170 |
| C    | 8.053089  | 14.450709 | 5.885240 |
| H    | 8.209295  | 14.109203 | 4.866012 |
| C    | 1.260334  | 14.367389 | 4.331105 |
| C    | 0.727702  | 15.606625 | 3.959184 |
| H    | 1.245315  | 16.526497 | 4.216607 |
| C    | -0.467563 | 15.675031 | 3.246756 |
| H    | -0.870508 | 16.643163 | 2.964650 |
| C    | -1.140874 | 14.507553 | 2.899036 |
| H    | -2.073719 | 14.561745 | 2.345674 |
| C    | -0.613999 | 13.268714 | 3.261276 |
| H    | -1.134969 | 12.354955 | 2.990489 |

|   |           |           |           |
|---|-----------|-----------|-----------|
| C | 0.582514  | 13.194380 | 3.967727  |
| H | 0.988664  | 12.223869 | 4.237963  |
| C | 2.486744  | 13.394407 | 6.764185  |
| C | 3.557058  | 13.037887 | 7.592621  |
| H | 4.577604  | 13.199345 | 7.256867  |
| C | 3.323031  | 12.470603 | 8.842153  |
| H | 4.163744  | 12.183867 | 9.466136  |
| C | 2.016539  | 12.255565 | 9.276897  |
| H | 1.833165  | 11.809894 | 10.250171 |
| C | 0.946002  | 12.616521 | 8.461547  |
| H | -0.074472 | 12.461529 | 8.800305  |
| C | 1.176477  | 13.187083 | 7.211445  |
| H | 0.335134  | 13.470380 | 6.587526  |
| C | 8.286180  | 9.934817  | 1.801399  |
| C | 9.383096  | 9.446469  | 2.519989  |
| H | 9.233096  | 8.915650  | 3.455672  |
| C | 10.679687 | 9.644036  | 2.050235  |
| H | 11.520383 | 9.257362  | 2.618429  |
| C | 10.895988 | 10.331513 | 0.859902  |
| H | 11.906841 | 10.483047 | 0.493546  |
| C | 9.810161  | 10.822717 | 0.136919  |
| H | 9.970748  | 11.355316 | -0.795723 |
| C | 8.515251  | 10.629282 | 0.605886  |
| H | 7.681030  | 11.004027 | 0.019387  |
| C | 5.645877  | 8.967591  | 1.095369  |
| C | 6.283824  | 8.329869  | 0.022474  |
| H | 7.364910  | 8.357688  | -0.066420 |
| C | 5.534742  | 7.655725  | -0.938901 |
| H | 6.040848  | 7.171604  | -1.768836 |
| C | 4.147286  | 7.598351  | -0.835836 |
| H | 3.566941  | 7.072607  | -1.588184 |
| C | 3.506441  | 8.215517  | 0.236579  |
| H | 2.424994  | 8.169918  | 0.326879  |
| C | 4.249035  | 8.897152  | 1.196572  |
| H | 3.741976  | 9.376782  | 2.029837  |
| C | 3.429800  | 9.242037  | 5.228909  |
| C | 2.464262  | 9.879434  | 6.017312  |
| H | 2.741528  | 10.714288 | 6.652444  |
| C | 1.146330  | 9.431701  | 6.010006  |
| H | 0.411354  | 9.932776  | 6.632859  |
| C | 0.776724  | 8.344279  | 5.220479  |
| H | -0.250890 | 7.992649  | 5.222561  |
| C | 1.733371  | 7.701589  | 4.439545  |
| H | 1.457676  | 6.843407  | 3.833427  |
| C | 5.571405  | 10.001341 | 6.993130  |
| C | 5.171747  | 8.986970  | 7.875463  |
| H | 4.543882  | 8.173438  | 7.521834  |
| C | 5.562307  | 9.018903  | 9.209764  |
| H | 5.247771  | 8.226045  | 9.882053  |
| C | 6.358219  | 10.062991 | 9.680780  |

|   |          |           |           |
|---|----------|-----------|-----------|
| H | 6.669670 | 10.081918 | 10.721234 |
| C | 6.750135 | 11.080177 | 8.814610  |
| H | 7.363414 | 11.902537 | 9.171003  |
| C | 6.355752 | 11.051931 | 7.477786  |
| H | 6.658183 | 11.859252 | 6.820051  |
| C | 6.082112 | 8.357037  | 4.754898  |
| H | 6.074754 | 7.505961  | 5.434955  |
| C | 6.729819 | 8.319285  | 3.587599  |
| H | 7.268709 | 7.433809  | 3.251926  |
| C | 4.366704 | 16.459748 | 5.773392  |
| H | 4.601062 | 17.433027 | 6.203169  |
| C | 3.142364 | 15.929818 | 5.854006  |
| H | 2.332092 | 16.432146 | 6.381802  |
| C | 3.053453 | 8.147185  | 4.441960  |
| H | 3.790252 | 7.630063  | 3.834233  |
| N | 4.989353 | 12.212531 | 0.403273  |
| H | 5.422266 | 11.294856 | 0.384115  |
| H | 3.152525 | 11.336349 | 0.668253  |
| H | 3.179110 | 13.092275 | 0.889633  |
| H | 5.467324 | 14.219427 | 0.557809  |
| H | 6.818729 | 13.137843 | 0.190948  |

---

**Table S25:** Cartesian coordinates of the optimized structure of *unsym*-[ $\mu$ H-(Fe<sup>I</sup>Fe<sup>II</sup>)adt]<sup>0</sup> (-4788.81465481 *E<sub>h</sub>*)

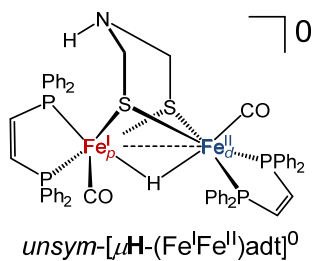

| atom | x         | y         | z        |
|------|-----------|-----------|----------|
| Fe   | 4.611717  | 13.983800 | 3.888902 |
| Fe   | 5.923450  | 11.445299 | 3.783111 |
| H    | 5.227004  | 12.981408 | 4.943166 |
| S    | 3.775144  | 12.006958 | 3.014854 |
| S    | 6.519829  | 13.418738 | 2.711366 |
| P    | 2.844595  | 14.356473 | 5.163897 |
| P    | 5.269146  | 9.836472  | 5.191512 |
| P    | 5.589762  | 15.645272 | 4.965946 |
| P    | 6.644674  | 9.659739  | 2.402459 |
| O    | 3.551184  | 15.736383 | 1.805152 |
| O    | 8.602201  | 11.402588 | 4.905995 |
| C    | 3.821842  | 12.268286 | 1.165166 |
| C    | 6.008534  | 13.337556 | 0.921378 |
| C    | 7.510768  | 11.422980 | 4.489991 |
| C    | 3.971684  | 15.039340 | 2.634551 |
| C    | 6.379479  | 16.998458 | 4.000342 |
| C    | 5.560577  | 17.950273 | 3.379374 |
| H    | 4.482462  | 17.905963 | 3.507794 |
| C    | 6.114366  | 18.955099 | 2.591689 |
| H    | 5.465188  | 19.687297 | 2.119526 |
| C    | 7.493464  | 19.017191 | 2.406108 |
| H    | 7.926399  | 19.799602 | 1.789001 |
| C    | 8.314233  | 18.071390 | 3.014996 |
| H    | 9.390889  | 18.111997 | 2.874962 |
| C    | 7.762929  | 17.068587 | 3.808421 |
| H    | 8.415891  | 16.343664 | 4.283473 |
| C    | 6.825681  | 15.301863 | 6.280459 |
| C    | 6.742311  | 15.853353 | 7.564019 |
| H    | 5.924363  | 16.517854 | 7.824320 |
| C    | 7.700075  | 15.545974 | 8.528090 |
| H    | 7.620447  | 15.979948 | 9.521198 |
| C    | 8.754459  | 14.688892 | 8.220812 |
| H    | 9.503095  | 14.454047 | 8.972728 |
| C    | 8.843666  | 14.131772 | 6.946162 |
| H    | 9.649036  | 13.447981 | 6.695993 |
| C    | 7.883147  | 14.432961 | 5.984046 |
| H    | 7.949675  | 13.981801 | 4.998731 |
| C    | 1.227157  | 14.484969 | 4.314104 |
| C    | 0.677769  | 15.725976 | 3.975280 |
| H    | 1.183655  | 16.643207 | 4.264220 |
| C    | -0.512056 | 15.801017 | 3.254239 |
| H    | -0.925180 | 16.772507 | 2.997418 |
| C    | -1.165066 | 14.636138 | 2.861852 |
| H    | -2.092771 | 14.694254 | 2.299323 |
| C    | -0.620648 | 13.394922 | 3.187617 |
| H    | -1.120847 | 12.481713 | 2.877226 |

|   |           |           |           |
|---|-----------|-----------|-----------|
| C | 0.569925  | 13.315790 | 3.903833  |
| H | 0.996677  | 12.344728 | 4.137310  |
| C | 2.435344  | 13.436886 | 6.708674  |
| C | 3.496757  | 12.987792 | 7.502303  |
| H | 4.516135  | 13.110803 | 7.147380  |
| C | 3.252762  | 12.364919 | 8.723695  |
| H | 4.088505  | 12.004182 | 9.315794  |
| C | 1.943502  | 12.180966 | 9.163832  |
| H | 1.752001  | 11.686299 | 10.112094 |
| C | 0.880735  | 12.628073 | 8.381813  |
| H | -0.142691 | 12.490942 | 8.721014  |
| C | 1.123285  | 13.257505 | 7.162474  |
| H | 0.288078  | 13.605002 | 6.562516  |
| C | 8.301865  | 9.769991  | 1.625494  |
| C | 9.454152  | 9.436711  | 2.347497  |
| H | 9.366187  | 9.028921  | 3.350448  |
| C | 10.719016 | 9.636680  | 1.798854  |
| H | 11.601172 | 9.370560  | 2.374746  |
| C | 10.853567 | 10.177688 | 0.523609  |
| H | 11.840276 | 10.333790 | 0.096723  |
| C | 9.713847  | 10.523414 | -0.201137 |
| H | 9.807765  | 10.948784 | -1.196600 |
| C | 8.450538  | 10.327096 | 0.346488  |
| H | 7.572953  | 10.595191 | -0.237293 |
| C | 5.657080  | 8.754717  | 1.122906  |
| C | 6.224762  | 7.958482  | 0.118854  |
| H | 7.304704  | 7.881978  | 0.034167  |
| C | 5.414312  | 7.267639  | -0.777698 |
| H | 5.869541  | 6.657127  | -1.553070 |
| C | 4.026509  | 7.353615  | -0.680665 |
| H | 3.396674  | 6.814623  | -1.383137 |
| C | 3.451850  | 8.133935  | 0.319198  |
| H | 2.371009  | 8.206193  | 0.404431  |
| C | 4.260491  | 8.832889  | 1.213070  |
| H | 3.807930  | 9.443722  | 1.990937  |
| C | 3.557131  | 9.152300  | 5.185796  |
| C | 2.545881  | 9.812859  | 5.895200  |
| H | 2.782822  | 10.690473 | 6.487988  |
| C | 1.235570  | 9.346119  | 5.858069  |
| H | 0.468191  | 9.871102  | 6.420120  |
| C | 0.912557  | 8.215324  | 5.109374  |
| H | -0.110895 | 7.850974  | 5.082681  |
| C | 1.910301  | 7.553154  | 4.400155  |
| H | 1.671653  | 6.667353  | 3.817468  |
| C | 5.621837  | 9.934127  | 7.002111  |
| C | 5.196097  | 8.929137  | 7.881159  |
| H | 4.585233  | 8.109786  | 7.510698  |
| C | 5.535824  | 8.977008  | 9.229675  |
| H | 5.199346  | 8.189948  | 9.899286  |
| C | 6.306941  | 10.031096 | 9.719723  |

|   |          |           |           |
|---|----------|-----------|-----------|
| H | 6.576265 | 10.065044 | 10.772100 |
| C | 6.727151 | 11.039657 | 8.856176  |
| H | 7.321770 | 11.870609 | 9.225587  |
| C | 6.383452 | 10.992491 | 7.505598  |
| H | 6.706487 | 11.786758 | 6.840413  |
| C | 6.242570 | 8.335567  | 4.767271  |
| H | 6.294205 | 7.513609  | 5.481625  |
| C | 6.865361 | 8.273434  | 3.585260  |
| H | 7.445623 | 7.398033  | 3.291320  |
| C | 4.280830 | 16.568385 | 5.858158  |
| H | 4.496155 | 17.531653 | 6.319844  |
| C | 3.063343 | 16.018409 | 5.913418  |
| H | 2.241004 | 16.490237 | 6.451417  |
| C | 3.224259 | 8.017457  | 4.438118  |
| H | 3.992681 | 7.490550  | 3.880076  |
| N | 5.106229 | 12.295394 | 0.528020  |
| H | 5.551038 | 11.388584 | 0.641119  |
| H | 3.246096 | 11.448021 | 0.728545  |
| H | 3.295341 | 13.204191 | 0.958921  |
| H | 5.570160 | 14.308099 | 0.669547  |
| H | 6.937734 | 13.220912 | 0.356701  |

---

**Table S26:** Cartesian coordinates of the optimized structure of  $[\iota\text{H}-(\text{Fe}^{\text{II}}\text{Fe}^{\text{II}})\text{adt}-\text{H}]^{2+}$  ( $-4788.96705002 E_h$ )

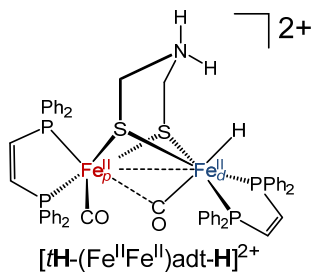

| atom | x         | y         | z         |
|------|-----------|-----------|-----------|
| Fe   | 12.397076 | 3.291206  | 4.065225  |
| Fe   | 14.038075 | 5.354641  | 4.350989  |
| S    | 13.209995 | 4.641881  | 2.355941  |
| S    | 14.606118 | 3.204997  | 4.723784  |
| P    | 10.405577 | 2.914359  | 3.064778  |
| P    | 11.871701 | 1.673596  | 5.527631  |
| P    | 16.004433 | 6.270695  | 3.811683  |
| P    | 13.120575 | 7.467967  | 4.077737  |
| N    | 14.627779 | 2.275989  | 2.133202  |
| O    | 11.200143 | 5.218629  | 5.901907  |
| O    | 14.438524 | 5.892144  | 7.194995  |
| C    | 10.591317 | 2.472132  | 1.300794  |
| C    | 10.609216 | 1.128755  | 0.906018  |
| H    | 10.448918 | 0.340326  | 1.636661  |
| C    | 10.817115 | 0.788267  | -0.429653 |
| H    | 10.811661 | -0.256574 | -0.725623 |
| C    | 11.010859 | 1.785066  | -1.382987 |
| H    | 11.160782 | 1.519864  | -2.425183 |
| C    | 10.995202 | 3.125554  | -0.997554 |
| H    | 11.131025 | 3.906915  | -1.739616 |
| C    | 10.789856 | 3.471456  | 0.336418  |
| H    | 10.777029 | 4.519816  | 0.621168  |
| C    | 8.907556  | 3.971885  | 3.152364  |
| C    | 8.497479  | 4.435381  | 4.411641  |
| H    | 9.090296  | 4.228704  | 5.296170  |
| C    | 7.310759  | 5.149495  | 4.546110  |
| H    | 7.003392  | 5.498349  | 5.527237  |
| C    | 6.515157  | 5.402704  | 3.430464  |
| H    | 5.586478  | 5.954824  | 3.537582  |
| C    | 6.905580  | 4.929304  | 2.180107  |
| H    | 6.278569  | 5.103519  | 1.310702  |
| C    | 8.093411  | 4.214639  | 2.037642  |
| H    | 8.369750  | 3.834509  | 1.060133  |
| C    | 9.740702  | 1.403865  | 3.843985  |
| H    | 8.819808  | 0.979914  | 3.444824  |
| C    | 10.334857 | 0.902639  | 4.930237  |
| H    | 9.944277  | 0.023162  | 5.439653  |
| C    | 11.562504 | 2.095045  | 7.272241  |
| C    | 11.801068 | 4.568145  | 5.154354  |
| C    | 14.305422 | 3.538073  | 1.410317  |
| H    | 13.769971 | 3.249785  | 0.502029  |
| H    | 15.236750 | 4.044564  | 1.151700  |
| C    | 15.491360 | 2.423545  | 3.333948  |
| H    | 16.376773 | 3.000100  | 3.057933  |
| H    | 15.778869 | 1.417430  | 3.647599  |
| C    | 14.287363 | 5.709262  | 6.070246  |

|   |           |           |           |
|---|-----------|-----------|-----------|
| C | 16.666054 | 5.915691  | 2.138897  |
| C | 17.761696 | 5.060113  | 1.960934  |
| H | 18.278332 | 4.648740  | 2.824146  |
| C | 18.225245 | 4.771064  | 0.677485  |
| H | 19.085079 | 4.119948  | 0.550102  |
| C | 17.606908 | 5.339065  | -0.434484 |
| H | 17.979851 | 5.126841  | -1.431865 |
| C | 16.520324 | 6.197563  | -0.262943 |
| H | 16.046400 | 6.655009  | -1.126257 |
| C | 16.047534 | 6.482206  | 1.015408  |
| H | 15.196648 | 7.147216  | 1.136738  |
| C | 15.776322 | 8.076988  | 3.753034  |
| H | 16.646038 | 8.719995  | 3.630972  |
| C | 14.543793 | 8.580880  | 3.845124  |
| H | 14.365036 | 9.655284  | 3.829348  |
| C | 12.274836 | 8.295493  | 5.477158  |
| H | 12.511263 | 1.988612  | 3.268949  |
| H | 15.020463 | 1.582769  | 1.487932  |
| H | 13.688039 | 1.941704  | 2.518096  |
| C | 13.033468 | 0.254584  | 5.556912  |
| C | 13.134198 | -0.556502 | 4.416833  |
| H | 12.502991 | -0.360758 | 3.552502  |
| C | 14.006962 | -1.640398 | 4.398641  |
| H | 14.057924 | -2.279848 | 3.521897  |
| C | 14.795160 | -1.920549 | 5.515161  |
| H | 15.471236 | -2.770043 | 5.504299  |
| C | 14.696550 | -1.121016 | 6.650461  |
| H | 15.295894 | -1.344476 | 7.527794  |
| C | 13.816644 | -0.039993 | 6.676861  |
| H | 13.733952 | 0.561312  | 7.576364  |
| C | 12.524335 | 2.845174  | 7.963788  |
| C | 12.326769 | 3.182345  | 9.298572  |
| H | 13.079729 | 3.759968  | 9.825780  |
| C | 11.161345 | 2.785979  | 9.952623  |
| H | 11.004935 | 3.052817  | 10.993234 |
| C | 10.196367 | 2.050622  | 9.269614  |
| H | 9.286406  | 1.742315  | 9.775113  |
| C | 10.393702 | 1.702403  | 7.935492  |
| H | 9.628865  | 1.128984  | 7.421871  |
| C | 17.454822 | 6.050145  | 4.899993  |
| C | 17.470247 | 5.096129  | 5.923240  |
| H | 16.612829 | 4.451858  | 6.084487  |
| C | 18.591432 | 4.959169  | 6.739727  |
| H | 18.591402 | 4.217631  | 7.532712  |
| C | 19.703435 | 5.772000  | 6.542922  |
| H | 20.573623 | 5.668544  | 7.183780  |
| C | 19.701616 | 6.718381  | 5.518120  |
| C | 18.588072 | 6.855583  | 4.698220  |
| C | 12.069890 | 7.782255  | 2.617981  |
| C | 12.443797 | 8.709926  | 1.638181  |



|   |           |           |           |
|---|-----------|-----------|-----------|
| H | 13.375863 | 9.259836  | 1.724196  |
| C | 11.616351 | 8.950264  | 0.543541  |
| H | 11.913631 | 9.679742  | -0.203747 |
| C | 10.406824 | 8.272605  | 0.418561  |
| H | 9.755940  | 8.473493  | -0.426975 |
| C | 10.030536 | 7.341950  | 1.385579  |
| H | 9.085389  | 6.813923  | 1.302805  |
| C | 10.860918 | 7.087956  | 2.473900  |
| H | 10.551571 | 6.354698  | 3.214124  |
| C | 13.055363 | 8.728294  | 6.558980  |
| H | 14.132279 | 8.584111  | 6.557700  |
| C | 12.461772 | 9.371399  | 7.640198  |
| H | 13.077631 | 9.710832  | 8.467334  |
| C | 11.085662 | 9.587094  | 7.654522  |
| H | 10.623363 | 10.092939 | 8.496566  |
| C | 10.306872 | 9.165110  | 6.580139  |
| H | 9.236147  | 9.344922  | 6.579681  |
| C | 10.894763 | 8.523540  | 5.493713  |
| H | 10.274972 | 8.223414  | 4.656043  |
| H | 13.433587 | 3.165255  | 7.461198  |
| H | 20.569719 | 7.349882  | 5.356521  |
| H | 18.614660 | 7.582602  | 3.891337  |

---

**Table S27:** Cartesian coordinates of the optimized structure of  $[\text{tH}-(\text{Fe}^{\text{II}}\text{Fe}^{\text{II}})\text{adt}-\text{H}]^{2+}$  and  $1\text{BF}_4^-$  ( $-5214.45104427 E_h$ )

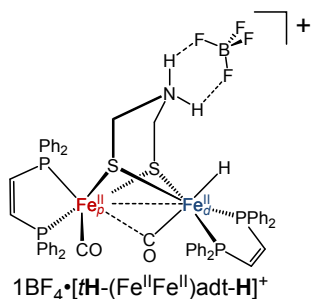

| atom | x         | y         | z         |
|------|-----------|-----------|-----------|
| Fe   | 8.954269  | 14.343289 | 4.890860  |
| Fe   | 7.249073  | 16.326675 | 4.729789  |
| S    | 8.188919  | 15.609460 | 6.670528  |
| S    | 6.734237  | 14.165091 | 4.376366  |
| P    | 10.915174 | 13.912889 | 5.895796  |
| P    | 9.496353  | 12.777443 | 3.379560  |
| P    | 5.299395  | 17.175417 | 5.396821  |
| P    | 8.125820  | 18.441499 | 4.993432  |
| N    | 6.778930  | 13.228619 | 6.996753  |
| O    | 10.057573 | 16.365918 | 3.103140  |
| O    | 6.710240  | 16.811875 | 1.902095  |
| C    | 10.716469 | 13.544631 | 7.672467  |
| C    | 10.415887 | 12.239304 | 8.076404  |
| H    | 10.368060 | 11.432204 | 7.351294  |
| C    | 10.133720 | 11.961323 | 9.412848  |
| H    | 9.871110  | 10.949087 | 9.702932  |
| C    | 10.158891 | 12.985535 | 10.356012 |
| H    | 9.939263  | 12.768616 | 11.397134 |
| C    | 10.456309 | 14.290428 | 9.960445  |
| H    | 10.473956 | 15.092126 | 10.693251 |
| C    | 10.725055 | 14.575167 | 8.624251  |
| H    | 10.932832 | 15.598610 | 8.325199  |
| C    | 12.461459 | 14.905633 | 5.774505  |
| C    | 12.801139 | 15.468971 | 4.536459  |
| H    | 12.131391 | 15.376503 | 3.688611  |
| C    | 14.008927 | 16.142045 | 4.374313  |
| H    | 14.256761 | 16.572832 | 3.408712  |
| C    | 14.897322 | 16.254200 | 5.441604  |
| H    | 15.840386 | 16.777327 | 5.313819  |
| C    | 14.577888 | 15.678859 | 6.669340  |
| H    | 15.273820 | 15.744433 | 7.500699  |
| C    | 13.369878 | 15.004932 | 6.837180  |
| H    | 13.142931 | 14.549793 | 7.795319  |
| C    | 11.525956 | 12.358256 | 5.157888  |
| H    | 12.389679 | 11.870694 | 5.607990  |
| C    | 10.953017 | 11.903036 | 4.040863  |
| H    | 11.302900 | 11.001674 | 3.540077  |
| C    | 9.991184  | 13.302314 | 1.702187  |
| C    | 9.084379  | 14.050866 | 0.939021  |
| H    | 8.106164  | 14.299704 | 1.343260  |
| C    | 9.425458  | 14.479805 | -0.339038 |
| H    | 8.712585  | 15.055387 | -0.921692 |
| C    | 10.681015 | 14.178172 | -0.864520 |
| H    | 10.948714 | 14.516417 | -1.861041 |
| C    | 11.592064 | 13.446076 | -0.108580 |
| H    | 12.572006 | 13.210220 | -0.512790 |

|   |           |           |           |
|---|-----------|-----------|-----------|
| C | 11.250403 | 13.006987 | 1.169008  |
| H | 11.972823 | 12.437665 | 1.745757  |
| C | 9.490055  | 15.666826 | 3.839956  |
| C | 7.167429  | 14.481438 | 7.671059  |
| H | 7.766658  | 14.194072 | 8.538936  |
| H | 6.264416  | 14.992372 | 8.006565  |
| C | 5.929202  | 13.352533 | 5.798623  |
| H | 5.019270  | 13.888594 | 6.074834  |
| H | 5.676917  | 12.335692 | 5.488131  |
| C | 6.912477  | 16.656319 | 3.025276  |
| C | 4.684087  | 16.767317 | 7.076190  |
| C | 3.634622  | 15.857783 | 7.259264  |
| H | 3.120512  | 15.437340 | 6.399155  |
| C | 3.225159  | 15.507235 | 8.545003  |
| H | 2.413412  | 14.798235 | 8.676443  |
| C | 3.848501  | 16.071541 | 9.655759  |
| H | 3.525683  | 15.799992 | 10.656086 |
| C | 4.883009  | 16.990403 | 9.479897  |
| H | 5.364810  | 17.439901 | 10.343080 |
| C | 5.304320  | 17.333779 | 8.198178  |
| H | 6.123158  | 18.036828 | 8.072393  |
| C | 5.492957  | 18.985267 | 5.524974  |
| H | 4.623138  | 19.604986 | 5.735277  |
| C | 6.710160  | 19.517949 | 5.394104  |
| H | 6.871536  | 20.593148 | 5.460842  |
| C | 9.317686  | 18.748479 | 6.343981  |
| C | 9.021047  | 19.616805 | 7.400715  |
| H | 8.065876  | 20.131535 | 7.439989  |
| C | 9.950487  | 19.835372 | 8.414961  |
| H | 9.709142  | 20.515562 | 9.226412  |
| C | 11.186165 | 19.194927 | 8.382381  |
| H | 11.913429 | 19.375825 | 9.168290  |
| C | 11.487307 | 18.322624 | 7.337932  |
| H | 12.447713 | 17.816656 | 7.301339  |
| C | 10.554851 | 18.090507 | 6.330520  |
| C | 7.911651  | 19.743039 | 2.539232  |
| H | 6.851497  | 19.521197 | 2.624144  |
| C | 8.369978  | 20.437415 | 1.424400  |
| H | 7.667098  | 20.739969 | 0.654001  |
| C | 9.722555  | 20.746482 | 1.302044  |
| H | 10.080447 | 21.289657 | 0.432581  |
| C | 10.612071 | 20.365308 | 2.302830  |
| H | 11.666138 | 20.612451 | 2.218712  |
| C | 10.157988 | 19.673128 | 3.422119  |
| H | 10.862568 | 19.400054 | 4.199839  |
| H | 8.863303  | 13.032687 | 5.633194  |
| H | 6.330851  | 12.556073 | 7.682234  |
| H | 7.646916  | 12.743227 | 6.708237  |
| B | 6.738946  | 10.190199 | 8.193870  |
| F | 5.995966  | 9.325177  | 7.416998  |

|   |           |           |          |
|---|-----------|-----------|----------|
| F | 7.243119  | 9.632085  | 9.339434 |
| F | 7.797817  | 10.748692 | 7.403481 |
| F | 5.895330  | 11.334985 | 8.546679 |
| C | 8.300021  | 11.415177 | 3.124348 |
| C | 7.912299  | 10.659009 | 4.239460 |
| H | 8.315842  | 10.865632 | 5.226132 |
| C | 7.003176  | 9.614218  | 4.102537 |
| H | 6.711501  | 9.049122  | 4.983184 |
| C | 6.475582  | 9.314280  | 2.846740 |
| H | 5.764799  | 8.500454  | 2.737314 |
| C | 6.866734  | 10.053327 | 1.733396 |
| H | 6.466930  | 9.815141  | 0.751958 |
| C | 7.777436  | 11.100120 | 1.865878 |
| H | 8.079776  | 11.660668 | 0.987565 |
| C | 3.809572  | 16.966452 | 4.354760 |
| C | 3.758490  | 15.992193 | 3.352367 |
| H | 4.610101  | 15.342727 | 3.178708 |
| C | 2.608604  | 15.836937 | 2.579995 |
| H | 2.581354  | 15.075809 | 1.806182 |
| C | 1.503362  | 16.652680 | 2.799576 |
| H | 0.609733  | 16.533589 | 2.194391 |
| C | 1.541079  | 17.619520 | 3.804175 |
| H | 0.677503  | 18.252093 | 3.985919 |
| C | 2.682984  | 17.772933 | 4.581244 |
| H | 2.683435  | 18.512531 | 5.376792 |
| H | 10.803013 | 17.397721 | 5.532106 |
| C | 8.803175  | 19.350959 | 3.547542 |

---

**Table S28:** Cartesian coordinates of the optimized structure of  $[\text{tH}-(\text{Fe}^{\text{II}}\text{Fe}^{\text{II}})\text{adt}-\text{H}]^{2+}$  and  $2\text{BF}_4^-$  ( $-5639.82929386 E_h$ )

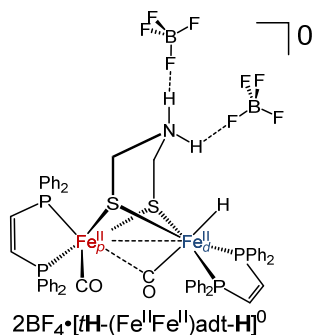

| atom | x         | y         | z         |
|------|-----------|-----------|-----------|
| Fe   | 8.844445  | 14.311357 | 4.995428  |
| Fe   | 7.183486  | 16.284840 | 4.781803  |
| S    | 8.116487  | 15.606353 | 6.744594  |
| S    | 6.631765  | 14.116502 | 4.560144  |
| P    | 10.762731 | 13.801472 | 6.011726  |
| P    | 9.385402  | 12.765921 | 3.456688  |
| P    | 5.253942  | 17.190500 | 5.415718  |
| P    | 8.083109  | 18.394382 | 4.953643  |
| N    | 6.559243  | 13.307890 | 7.273421  |
| O    | 10.083097 | 16.347650 | 3.320675  |
| O    | 6.658287  | 16.617717 | 1.935248  |
| C    | 10.617828 | 13.550876 | 7.810087  |
| C    | 10.380926 | 12.266118 | 8.309650  |
| H    | 10.343484 | 11.406468 | 7.647218  |
| C    | 10.134642 | 12.078671 | 9.669582  |
| H    | 9.909864  | 11.078645 | 10.025317 |
| C    | 10.136839 | 13.167297 | 10.536665 |
| H    | 9.929189  | 13.021071 | 11.592434 |
| C    | 10.380468 | 14.450404 | 10.044408 |
| H    | 10.372396 | 15.303770 | 10.716656 |
| C    | 10.610679 | 14.647637 | 8.686277  |
| H    | 10.765801 | 15.654971 | 8.310684  |
| C    | 12.338942 | 14.737145 | 5.780125  |
| C    | 12.708353 | 15.099488 | 4.477163  |
| H    | 12.056297 | 14.872009 | 3.640210  |
| C    | 13.918949 | 15.742311 | 4.236312  |
| H    | 14.187380 | 16.014266 | 3.219533  |
| C    | 14.781756 | 16.029378 | 5.291863  |
| H    | 15.727080 | 16.530508 | 5.103778  |
| C    | 14.432845 | 15.656951 | 6.587465  |
| H    | 15.109027 | 15.856673 | 7.414194  |
| C    | 13.222077 | 15.010992 | 6.832337  |
| H    | 12.973264 | 14.707929 | 7.843745  |
| C    | 11.279436 | 12.189688 | 5.330390  |
| H    | 12.067112 | 11.629350 | 5.830226  |
| C    | 10.706167 | 11.757720 | 4.205218  |
| H    | 10.977867 | 10.805754 | 3.753507  |
| C    | 10.095448 | 13.301572 | 1.851222  |
| C    | 9.392958  | 14.227647 | 1.069027  |
| H    | 8.453119  | 14.640707 | 1.424629  |
| C    | 9.890783  | 14.635910 | -0.164382 |
| H    | 9.331559  | 15.353096 | -0.758007 |
| C    | 11.106102 | 14.135895 | -0.627024 |
| H    | 11.498031 | 14.458629 | -1.587302 |
| C    | 11.818913 | 13.225336 | 0.148114  |
| H    | 12.768591 | 12.833120 | -0.204498 |

|   |           |           |           |
|---|-----------|-----------|-----------|
| C | 11.316599 | 12.807234 | 1.378484  |
| H | 11.884286 | 12.095416 | 1.969514  |
| C | 9.450987  | 15.642205 | 4.001977  |
| C | 7.085346  | 14.575086 | 7.829812  |
| H | 7.695801  | 14.303198 | 8.692395  |
| H | 6.238768  | 15.160059 | 8.187986  |
| C | 5.794003  | 13.393784 | 6.013334  |
| H | 4.879323  | 13.953802 | 6.216905  |
| H | 5.536007  | 12.367599 | 5.742937  |
| C | 6.854813  | 16.523175 | 3.069760  |
| C | 4.676050  | 16.955763 | 7.131704  |
| C | 3.626376  | 16.076457 | 7.427717  |
| H | 3.082844  | 15.582728 | 6.626874  |
| C | 3.276974  | 15.824840 | 8.751429  |
| H | 2.504294  | 15.101158 | 8.984215  |
| C | 3.957896  | 16.460848 | 9.786541  |
| H | 3.706555  | 16.222187 | 10.813828 |
| C | 4.982311  | 17.360152 | 9.497111  |
| H | 5.516728  | 17.854552 | 10.302949 |
| C | 5.349986  | 17.601796 | 8.176878  |
| H | 6.176023  | 18.274431 | 7.962364  |
| C | 5.450670  | 19.006427 | 5.369241  |
| H | 4.578985  | 19.644118 | 5.506421  |
| C | 6.675233  | 19.519807 | 5.231186  |
| H | 6.848236  | 20.595237 | 5.219094  |
| C | 9.237418  | 18.772809 | 6.322291  |
| C | 8.914072  | 19.706294 | 7.313244  |
| H | 7.964518  | 20.232164 | 7.283509  |
| C | 9.804002  | 19.970765 | 8.351782  |
| H | 9.538147  | 20.697156 | 9.114277  |
| C | 11.028469 | 19.311440 | 8.408994  |
| H | 11.723628 | 19.522760 | 9.216286  |
| C | 11.357046 | 18.376011 | 7.429805  |
| H | 12.307176 | 17.850584 | 7.464412  |
| C | 10.463616 | 18.097827 | 6.399099  |
| C | 7.979427  | 19.555055 | 2.419699  |
| H | 6.918464  | 19.327722 | 2.470134  |
| C | 8.483359  | 20.188761 | 1.288179  |
| H | 7.813549  | 20.440090 | 0.470923  |
| C | 9.838225  | 20.500780 | 1.207909  |
| H | 10.232491 | 20.995512 | 0.324980  |
| C | 10.683385 | 20.181862 | 2.267152  |
| H | 11.740155 | 20.427391 | 2.215412  |
| C | 10.182420 | 19.549716 | 3.401859  |
| H | 10.853271 | 19.318379 | 4.221830  |
| H | 8.693137  | 13.022235 | 5.749117  |
| H | 5.874799  | 12.930075 | 7.989717  |
| H | 7.296848  | 12.583115 | 7.176485  |
| B | 8.382324  | 9.607450  | 7.288820  |
| F | 7.530412  | 8.667545  | 6.726096  |

|   |           |           |           |
|---|-----------|-----------|-----------|
| F | 9.596742  | 9.664081  | 6.565726  |
| F | 7.760738  | 10.918373 | 7.140699  |
| F | 8.630537  | 9.380067  | 8.630450  |
| B | 4.664194  | 12.896288 | 10.254593 |
| F | 5.739268  | 13.806866 | 10.360421 |
| F | 3.473545  | 13.493129 | 10.666665 |
| F | 4.924752  | 11.727883 | 10.929273 |
| F | 4.544724  | 12.607038 | 8.821565  |
| C | 8.123426  | 11.529659 | 2.985608  |
| C | 7.781283  | 10.560657 | 3.935572  |
| H | 8.278812  | 10.528116 | 4.898322  |
| C | 6.803931  | 9.611623  | 3.647783  |
| H | 6.566546  | 8.867709  | 4.401976  |
| C | 6.159345  | 9.629507  | 2.412722  |
| H | 5.396202  | 8.889837  | 2.186708  |
| C | 6.501023  | 10.590153 | 1.462477  |
| H | 6.009179  | 10.599790 | 0.493556  |
| C | 7.481933  | 11.538157 | 1.742355  |
| H | 7.750568  | 12.269015 | 0.986309  |
| C | 3.740883  | 16.908667 | 4.420347  |
| C | 3.682972  | 15.898453 | 3.455779  |
| H | 4.540428  | 15.254565 | 3.290469  |
| C | 2.517982  | 15.695543 | 2.717379  |
| H | 2.485921  | 14.903274 | 1.975474  |
| C | 1.403791  | 16.499356 | 2.933809  |
| H | 0.496981  | 16.340567 | 2.357550  |
| C | 1.448334  | 17.502714 | 3.901627  |
| H | 0.576694  | 18.124147 | 4.084805  |
| C | 2.605809  | 17.703165 | 4.644103  |
| H | 2.613274  | 18.465657 | 5.418032  |
| H | 10.731522 | 17.353326 | 5.655625  |
| C | 8.825495  | 19.225432 | 3.487068  |

---

**Table S29:** Cartesian coordinates of the optimized structure of  $[t\text{H}-(\text{Fe}^{\text{I}}\text{Fe}^{\text{II}})\text{adt}-\text{H}]^+$   
 (-4789.23851241  $E_h$ )

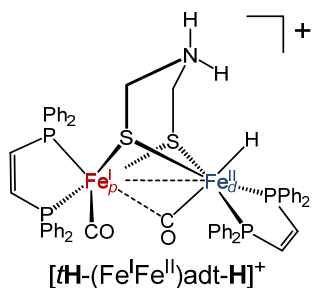

| atom | x         | y         | z         |
|------|-----------|-----------|-----------|
| Fe   | 12.180853 | 3.192851  | 4.148116  |
| Fe   | 14.073312 | 5.543279  | 4.463268  |
| S    | 13.107068 | 4.646144  | 2.532523  |
| S    | 14.365460 | 3.321832  | 5.015796  |
| P    | 10.288585 | 2.772837  | 3.052065  |
| P    | 11.684764 | 1.530206  | 5.521919  |
| P    | 16.127114 | 6.359427  | 3.780224  |
| P    | 13.268888 | 7.625611  | 4.100793  |
| N    | 14.633960 | 2.338561  | 2.462014  |
| O    | 10.941694 | 5.272435  | 5.797353  |
| O    | 14.380019 | 6.085735  | 7.305907  |
| C    | 10.511087 | 2.345057  | 1.286637  |
| C    | 10.451764 | 1.015518  | 0.853852  |
| H    | 10.214206 | 0.222394  | 1.557390  |
| C    | 10.695040 | 0.693736  | -0.480047 |
| H    | 10.636989 | -0.341789 | -0.802787 |
| C    | 11.000790 | 1.696605  | -1.396373 |
| H    | 11.183877 | 1.446464  | -2.437269 |
| C    | 11.063406 | 3.023848  | -0.974000 |
| H    | 11.295288 | 3.811961  | -1.684717 |
| C    | 10.824005 | 3.349969  | 0.358985  |
| H    | 10.886739 | 4.386667  | 0.676762  |
| C    | 8.785979  | 3.836016  | 3.087583  |
| C    | 8.304728  | 4.240993  | 4.340952  |
| H    | 8.831608  | 3.959705  | 5.247177  |
| C    | 7.141784  | 4.998066  | 4.440743  |
| H    | 6.782605  | 5.302626  | 5.419204  |
| C    | 6.441593  | 5.359556  | 3.291702  |
| H    | 5.533686  | 5.950276  | 3.369741  |
| C    | 6.904447  | 4.950762  | 2.043668  |
| H    | 6.354589  | 5.214198  | 1.144615  |
| C    | 8.067834  | 4.190215  | 1.939100  |
| H    | 8.404444  | 3.864843  | 0.960522  |
| C    | 9.588065  | 1.255697  | 3.797334  |
| H    | 8.672558  | 0.836683  | 3.380540  |
| C    | 10.162397 | 0.740659  | 4.889318  |
| H    | 9.748583  | -0.138635 | 5.380056  |
| C    | 11.367352 | 1.795153  | 7.304484  |
| C    | 11.523106 | 4.510041  | 5.147697  |
| C    | 14.304410 | 3.565834  | 1.683840  |
| H    | 13.855488 | 3.217893  | 0.749330  |
| H    | 15.226527 | 4.110446  | 1.475774  |
| C    | 15.386755 | 2.528522  | 3.729233  |
| H    | 16.275638 | 3.129958  | 3.525380  |
| H    | 15.677054 | 1.531342  | 4.070801  |
| C    | 14.259760 | 5.912914  | 6.163396  |



|   |           |           |           |
|---|-----------|-----------|-----------|
| C | 16.766563 | 6.005536  | 2.086581  |
| C | 17.835093 | 5.124054  | 1.871495  |
| H | 18.387328 | 4.726090  | 2.718809  |
| C | 18.216678 | 4.775020  | 0.576878  |
| H | 19.055241 | 4.100364  | 0.427281  |
| C | 17.540275 | 5.303125  | -0.520837 |
| H | 17.844845 | 5.038474  | -1.529171 |
| C | 16.478945 | 6.184254  | -0.317387 |
| H | 15.952283 | 6.608337  | -1.167690 |
| C | 16.091499 | 6.530037  | 0.974623  |
| H | 15.254759 | 7.208448  | 1.119418  |
| C | 15.932766 | 8.179136  | 3.676667  |
| H | 16.807122 | 8.809553  | 3.517556  |
| C | 14.711453 | 8.710972  | 3.786810  |
| H | 14.557652 | 9.789052  | 3.742323  |
| C | 12.463074 | 8.575388  | 5.457690  |
| H | 12.468597 | 1.913937  | 3.302261  |
| H | 15.098969 | 1.649923  | 1.864102  |
| H | 13.659550 | 1.979662  | 2.787667  |
| C | 12.886796 | 0.141886  | 5.511288  |
| C | 12.908120 | -0.752096 | 4.433243  |
| H | 12.174832 | -0.656267 | 3.635991  |
| C | 13.853598 | -1.772794 | 4.382646  |
| H | 13.848157 | -2.473613 | 3.552359  |
| C | 14.796076 | -1.902555 | 5.402179  |
| H | 15.531846 | -2.700620 | 5.365117  |
| C | 14.782694 | -1.013906 | 6.474792  |
| H | 15.509811 | -1.114644 | 7.275265  |
| C | 13.830152 | 0.001809  | 6.534291  |
| H | 13.820223 | 0.683407  | 7.379274  |
| C | 11.958448 | 2.886862  | 7.950707  |
| C | 11.760684 | 3.090513  | 9.314583  |
| H | 12.225863 | 3.942346  | 9.801186  |
| C | 10.966986 | 2.209749  | 10.043573 |
| H | 10.806995 | 2.372342  | 11.105342 |
| C | 10.379417 | 1.115762  | 9.409880  |
| H | 9.763392  | 0.423228  | 9.975842  |
| C | 10.582613 | 0.904488  | 8.050371  |
| H | 10.130418 | 0.037304  | 7.578811  |
| C | 17.637663 | 6.183995  | 4.808160  |
| C | 17.607687 | 5.327097  | 5.913366  |
| H | 16.699716 | 4.775723  | 6.140078  |
| C | 18.731133 | 5.184049  | 6.726794  |
| H | 18.694246 | 4.518774  | 7.584523  |
| C | 19.891660 | 5.897728  | 6.444280  |
| H | 20.765305 | 5.791076  | 7.080734  |
| C | 19.933323 | 6.751748  | 5.341649  |
| C | 18.815611 | 6.891936  | 4.526730  |
| C | 12.183324 | 7.937373  | 2.654236  |
| C | 12.529989 | 8.835798  | 1.639266  |

|   |           |           |           |
|---|-----------|-----------|-----------|
| H | 13.463633 | 9.387639  | 1.691736  |
| C | 11.682708 | 9.037349  | 0.551301  |
| H | 11.965232 | 9.741638  | -0.225990 |
| C | 10.474993 | 8.350418  | 0.467616  |
| H | 9.810488  | 8.517468  | -0.375221 |
| C | 10.121170 | 7.449833  | 1.470774  |
| H | 9.180431  | 6.909101  | 1.418874  |
| C | 10.974437 | 7.235247  | 2.549721  |
| H | 10.689994 | 6.520059  | 3.317093  |
| C | 13.263911 | 9.018695  | 6.519079  |
| H | 14.332102 | 8.820350  | 6.518666  |
| C | 12.704173 | 9.722328  | 7.580746  |
| H | 13.339498 | 10.063062 | 8.393053  |
| C | 11.337096 | 9.988196  | 7.599855  |
| H | 10.899898 | 10.537680 | 8.428396  |
| C | 10.535188 | 9.552089  | 6.548836  |
| H | 9.469586  | 9.762676  | 6.552045  |
| C | 11.092628 | 8.851866  | 5.481969  |
| H | 10.454995 | 8.536921  | 4.662812  |
| H | 12.580227 | 3.581008  | 7.395020  |
| H | 20.838911 | 7.307893  | 5.117128  |
| H | 18.866728 | 7.545622  | 3.659657  |

---

**Table S30:** Cartesian coordinates of the optimized structure of  $[\text{H}_2\text{-(Fe}^{1.5}\text{Fe}^{1.5})\text{adt-H}]^+$   
 (-4789.23330398  $E_h$ )

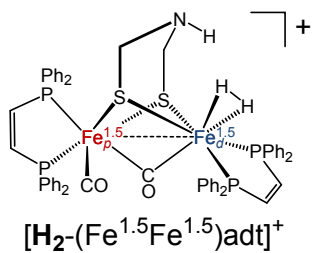

| atom | x         | y         | z         |
|------|-----------|-----------|-----------|
| Fe   | 12.521617 | 3.111542  | 4.008774  |
| Fe   | 13.926125 | 5.361107  | 4.441476  |
| S    | 13.296807 | 4.528865  | 2.341009  |
| S    | 14.684053 | 3.196306  | 4.822016  |
| P    | 10.377775 | 2.912701  | 3.236793  |
| P    | 11.906264 | 1.678434  | 5.661757  |
| P    | 15.961796 | 6.403047  | 3.927887  |
| P    | 13.024127 | 7.457539  | 4.123823  |
| N    | 15.330279 | 2.523384  | 2.140259  |
| O    | 11.247453 | 5.081199  | 5.722196  |
| O    | 14.435992 | 5.987811  | 7.235696  |
| C    | 10.264408 | 1.888955  | 1.716835  |
| C    | 9.460217  | 0.745832  | 1.644401  |
| H    | 8.863268  | 0.438980  | 2.497823  |
| C    | 9.417455  | -0.012678 | 0.476418  |
| H    | 8.790928  | -0.898810 | 0.434159  |
| C    | 10.169052 | 0.365576  | -0.633033 |
| H    | 10.131706 | -0.225627 | -1.543121 |
| C    | 10.967977 | 1.505856  | -0.572188 |
| H    | 11.552187 | 1.808462  | -1.436498 |
| C    | 11.021579 | 2.261470  | 0.596264  |
| H    | 11.647110 | 3.150420  | 0.642411  |
| C    | 9.169648  | 4.262926  | 2.925058  |
| C    | 8.665070  | 4.982696  | 4.018140  |
| H    | 9.028591  | 4.782353  | 5.020182  |
| C    | 7.694937  | 5.962313  | 3.823954  |
| H    | 7.307259  | 6.505264  | 4.680890  |
| C    | 7.216484  | 6.235194  | 2.544380  |
| H    | 6.453189  | 6.993512  | 2.396941  |
| C    | 7.711872  | 5.521598  | 1.455695  |
| H    | 7.331212  | 5.716214  | 0.456951  |
| C    | 8.683025  | 4.540248  | 1.641575  |
| H    | 9.043946  | 3.977730  | 0.786682  |
| C    | 9.451662  | 1.944569  | 4.480392  |
| H    | 8.373066  | 1.837024  | 4.370681  |
| C    | 10.104298 | 1.415927  | 5.519404  |
| H    | 9.583845  | 0.842560  | 6.285384  |
| C    | 12.122821 | 1.919375  | 7.461848  |
| C    | 12.090378 | 4.641494  | 5.022781  |
| C    | 14.727096 | 3.647166  | 1.501138  |
| H    | 14.335852 | 3.328553  | 0.531783  |
| H    | 15.481964 | 4.415337  | 1.327919  |
| C    | 15.864066 | 2.713711  | 3.443879  |
| H    | 16.635750 | 3.488959  | 3.415544  |
| H    | 16.323564 | 1.781878  | 3.782035  |
| C    | 14.222426 | 5.752453  | 6.123704  |

|   |           |           |           |
|---|-----------|-----------|-----------|
| C | 16.632734 | 6.428729  | 2.216478  |
| C | 17.820931 | 5.770406  | 1.875977  |
| H | 18.414899 | 5.282655  | 2.642956  |
| C | 18.255224 | 5.744353  | 0.552497  |
| H | 19.179084 | 5.231502  | 0.301688  |
| C | 17.511529 | 6.374320  | -0.442226 |
| H | 17.853637 | 6.354914  | -1.472713 |
| C | 16.327740 | 7.031167  | -0.110162 |
| H | 15.742371 | 7.525713  | -0.879766 |
| C | 15.886900 | 7.056259  | 1.209415  |
| H | 14.953294 | 7.557048  | 1.448983  |
| C | 15.665923 | 8.182620  | 4.223748  |
| H | 16.517320 | 8.855471  | 4.314290  |
| C | 14.411495 | 8.629064  | 4.320367  |
| H | 14.192142 | 9.679455  | 4.508090  |
| C | 11.838690 | 8.129828  | 5.354624  |
| H | 12.948342 | 1.523691  | 3.391001  |
| H | 14.763090 | 1.686448  | 2.079882  |
| H | 12.741228 | 1.927565  | 2.745369  |
| C | 12.592736 | -0.006875 | 5.407507  |
| C | 11.982644 | -0.905862 | 4.524559  |
| H | 11.049803 | -0.640937 | 4.033559  |
| C | 12.563834 | -2.146489 | 4.272660  |
| H | 12.076705 | -2.841206 | 3.594647  |
| C | 13.760889 | -2.496515 | 4.892962  |
| H | 14.211842 | -3.465006 | 4.698085  |
| C | 14.375292 | -1.603727 | 5.769409  |
| H | 15.305962 | -1.874724 | 6.259393  |
| C | 13.796454 | -0.364436 | 6.028615  |
| H | 14.274868 | 0.322354  | 6.720777  |
| C | 12.729807 | 3.064004  | 7.978692  |
| C | 12.868572 | 3.228418  | 9.355281  |
| H | 13.344937 | 4.124699  | 9.740554  |
| C | 12.398164 | 2.249815  | 10.224833 |
| H | 12.503702 | 2.378233  | 11.298076 |
| C | 11.794669 | 1.099023  | 9.717187  |
| H | 11.432860 | 0.328964  | 10.392073 |
| C | 11.660447 | 0.931010  | 8.344169  |
| H | 11.211421 | 0.018593  | 7.960178  |
| C | 17.453098 | 6.118507  | 4.959289  |
| C | 17.480146 | 5.104479  | 5.921687  |
| H | 16.624464 | 4.447663  | 6.042352  |
| C | 18.605100 | 4.926205  | 6.725871  |
| H | 18.612317 | 4.134792  | 7.469493  |
| C | 19.709643 | 5.758680  | 6.579350  |
| H | 20.583838 | 5.620861  | 7.208833  |
| C | 19.694154 | 6.771101  | 5.619806  |
| C | 18.575793 | 6.949521  | 4.814204  |
| C | 12.308759 | 7.962197  | 2.512356  |
| C | 12.759000 | 9.105865  | 1.839506  |

|   |           |           |           |
|---|-----------|-----------|-----------|
| H | 13.558258 | 9.710765  | 2.255864  |
| C | 12.191030 | 9.482145  | 0.625044  |
| H | 12.550794 | 10.372343 | 0.117327  |
| C | 11.162253 | 8.725322  | 0.071011  |
| H | 10.716737 | 9.020742  | -0.874430 |
| C | 10.706668 | 7.589103  | 0.734505  |
| H | 9.903516  | 6.992886  | 0.313739  |
| C | 11.278787 | 7.203539  | 1.943731  |
| H | 10.916157 | 6.309317  | 2.441018  |
| C | 12.317983 | 8.490923  | 6.620505  |
| H | 13.371252 | 8.381512  | 6.861926  |
| C | 11.452235 | 9.003547  | 7.581819  |
| H | 11.838799 | 9.285458  | 8.556779  |
| C | 10.099228 | 9.159872  | 7.291271  |
| H | 9.424289  | 9.564006  | 8.039979  |
| C | 9.617882  | 8.804643  | 6.034041  |
| H | 8.566029  | 8.936390  | 5.796755  |
| C | 10.479963 | 8.291752  | 5.068730  |
| H | 10.089864 | 8.031264  | 4.090364  |
| H | 13.098878 | 3.829853  | 7.311703  |
| H | 20.555395 | 7.421398  | 5.498130  |
| H | 18.586227 | 7.729106  | 4.056879  |

---

**Table S31:** Cartesian coordinates of the optimized structure of *sym*-[ $\mu$ -H-(Fe<sup>II</sup>Fe<sup>II</sup>)adt-H]<sup>2+</sup> (-4788.98367639 *E<sub>h</sub>*)

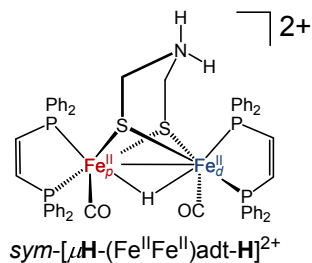

| atom | x         | y         | z         |
|------|-----------|-----------|-----------|
| Fe   | 5.121901  | 4.130346  | 4.461599  |
| Fe   | 4.958153  | 6.186505  | 6.090015  |
| S    | 6.916903  | 5.092002  | 5.545008  |
| S    | 4.708245  | 6.280362  | 3.765877  |
| P    | 6.032463  | 3.166224  | 2.630550  |
| P    | 5.446039  | 2.136188  | 5.531322  |
| P    | 5.623842  | 8.239064  | 6.786589  |
| P    | 2.813203  | 6.926043  | 6.466509  |
| O    | 2.506583  | 3.167693  | 3.625200  |
| O    | 5.135725  | 5.175849  | 8.810039  |
| N    | 7.322575  | 7.244619  | 3.765946  |
| H    | 6.994111  | 7.951792  | 4.447011  |
| C    | 5.132910  | 3.247024  | 1.040218  |
| C    | 4.106860  | 4.175779  | 0.834297  |
| H    | 3.828091  | 4.865788  | 1.624637  |
| C    | 3.436101  | 4.222933  | -0.386589 |
| H    | 2.640278  | 4.946368  | -0.535589 |
| C    | 3.779306  | 3.342650  | -1.408025 |
| H    | 3.250522  | 3.374969  | -2.355683 |
| C    | 4.806061  | 2.418535  | -1.214603 |
| H    | 5.080222  | 1.732714  | -2.010242 |
| C    | 5.483194  | 2.373086  | -0.001737 |
| H    | 6.295001  | 1.661767  | 0.121712  |
| C    | 7.760278  | 3.562990  | 2.141659  |
| C    | 8.822545  | 3.160155  | 2.962975  |
| H    | 8.625976  | 2.597646  | 3.870712  |
| C    | 10.135068 | 3.483907  | 2.628374  |
| H    | 10.950493 | 3.150797  | 3.263578  |
| C    | 10.402750 | 4.223652  | 1.476104  |
| H    | 11.427270 | 4.466729  | 1.211138  |
| C    | 9.352792  | 4.631913  | 0.656561  |
| H    | 9.556381  | 5.189170  | -0.253229 |
| C    | 8.037601  | 4.300316  | 0.982405  |
| H    | 7.231573  | 4.586085  | 0.311989  |
| C    | 6.109072  | 1.377315  | 2.981173  |
| H    | 6.365071  | 0.687659  | 2.178864  |
| C    | 5.838858  | 0.937226  | 4.213287  |
| H    | 5.866225  | -0.125981 | 4.446790  |
| C    | 4.054509  | 1.370649  | 6.433308  |
| C    | 4.143514  | 0.022279  | 6.812068  |
| H    | 5.031086  | -0.559552 | 6.579200  |
| C    | 3.105190  | -0.578934 | 7.512409  |
| H    | 3.180557  | -1.624332 | 7.795311  |
| C    | 1.974240  | 0.161439  | 7.856513  |
| H    | 1.165183  | -0.310097 | 8.406010  |
| C    | 1.888072  | 1.504234  | 7.503096  |

|   |           |           |           |
|---|-----------|-----------|-----------|
| H | 1.018871  | 2.091685  | 7.781106  |
| C | 2.923019  | 2.108646  | 6.792152  |
| H | 2.844742  | 3.158995  | 6.530227  |
| C | 6.837833  | 1.910900  | 6.701366  |
| C | 8.059362  | 1.361534  | 6.295492  |
| H | 8.195213  | 1.020145  | 5.273096  |
| C | 9.097448  | 1.202501  | 7.210868  |
| H | 10.033766 | 0.755086  | 6.890715  |
| C | 8.926232  | 1.593491  | 8.536326  |
| H | 9.732779  | 1.460243  | 9.250923  |
| C | 7.708467  | 2.131980  | 8.949079  |
| H | 7.560972  | 2.416290  | 9.986641  |
| C | 6.666724  | 2.286305  | 8.039632  |
| H | 5.711815  | 2.672675  | 8.382463  |
| C | 3.546260  | 3.547298  | 3.945478  |
| C | 7.982174  | 6.110687  | 4.491828  |
| H | 8.749782  | 6.568190  | 5.121793  |
| C | 6.164359  | 6.907533  | 2.883271  |
| H | 5.892979  | 7.840887  | 2.384437  |
| C | 5.060708  | 5.601676  | 7.743677  |
| C | 6.935669  | 8.374040  | 8.049961  |
| C | 7.103554  | 9.569164  | 8.769014  |
| H | 6.470667  | 10.429705 | 8.570937  |
| C | 8.096736  | 9.673174  | 9.736095  |
| H | 8.213726  | 10.599507 | 10.289977 |
| C | 8.938087  | 8.590761  | 9.994011  |
| H | 9.710556  | 8.673818  | 10.752349 |
| C | 8.784988  | 7.406060  | 9.280123  |
| H | 9.436600  | 6.560847  | 9.479503  |
| C | 7.787680  | 7.294653  | 8.312900  |
| H | 7.670456  | 6.361137  | 7.770390  |
| C | 6.102535  | 9.499876  | 5.524451  |
| C | 7.371867  | 10.099785 | 5.506787  |
| H | 8.095319  | 9.865993  | 6.282487  |
| C | 7.702106  | 11.016842 | 4.507827  |
| H | 8.682520  | 11.483976 | 4.511298  |
| C | 6.770380  | 11.352411 | 3.528143  |
| H | 7.024648  | 12.078271 | 2.761690  |
| C | 5.503439  | 10.765507 | 3.541968  |
| H | 4.769015  | 11.037409 | 2.789521  |
| C | 5.170766  | 9.840959  | 4.527613  |
| H | 4.182279  | 9.387469  | 4.525494  |
| C | 4.180515  | 9.029693  | 7.571282  |
| H | 4.313696  | 9.953149  | 8.131546  |
| C | 2.978661  | 8.466506  | 7.429218  |
| H | 2.088431  | 8.896536  | 7.886620  |
| C | 1.784007  | 7.434133  | 5.042453  |
| C | 1.383734  | 8.766397  | 4.877634  |
| H | 1.680193  | 9.525931  | 5.594628  |
| C | 0.585469  | 9.133432  | 3.796069  |

|   |           |           |           |
|---|-----------|-----------|-----------|
| H | 0.272655  | 10.167570 | 3.687570  |
| C | 0.175147  | 8.177381  | 2.871140  |
| H | -0.457643 | 8.463608  | 2.036674  |
| C | 0.573611  | 6.850824  | 3.024191  |
| H | 0.252979  | 6.097765  | 2.310643  |
| C | 1.380017  | 6.481947  | 4.096440  |
| H | 1.680871  | 5.444351  | 4.196115  |
| C | 1.687719  | 5.967053  | 7.554466  |
| C | 0.530124  | 5.338904  | 7.080411  |
| H | 0.257663  | 5.397889  | 6.032596  |
| C | -0.312618 | 4.665614  | 7.962795  |
| H | -1.217200 | 4.198553  | 7.584697  |
| C | -0.012045 | 4.613124  | 9.321850  |
| H | -0.677989 | 4.098806  | 10.008052 |
| C | 1.136431  | 5.239728  | 9.801307  |
| H | 1.370043  | 5.216741  | 10.861289 |
| C | 1.981656  | 5.913172  | 8.925405  |
| H | 2.858545  | 6.415020  | 9.323514  |
| H | 8.461169  | 5.481262  | 3.739165  |
| H | 6.518316  | 6.186683  | 2.143790  |
| H | 4.327000  | 4.685614  | 5.805010  |
| H | 8.037550  | 7.715852  | 3.200054  |

---



**Table S32:** Cartesian coordinates of the optimized structure of *sym*-[ $\mu\text{H}$ -(Fe<sup>1.5</sup>Fe<sup>1.5</sup>)adt-H]<sup>+</sup> (-4789.23545763 E<sub>h</sub>)

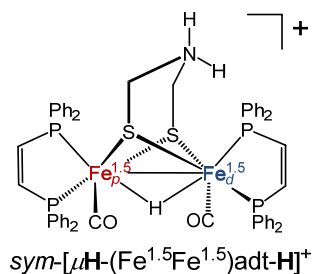

| atom | x         | y         | z         |
|------|-----------|-----------|-----------|
| Fe   | 5.106096  | 4.054364  | 4.428101  |
| Fe   | 4.970540  | 6.213700  | 6.148997  |
| S    | 6.926035  | 4.974999  | 5.585459  |
| S    | 4.666735  | 6.251942  | 3.803067  |
| P    | 6.102819  | 3.145643  | 2.592118  |
| P    | 5.362734  | 2.054339  | 5.407226  |
| P    | 5.636612  | 8.390029  | 6.753884  |
| P    | 2.855973  | 6.928512  | 6.597894  |
| O    | 2.478620  | 3.246577  | 3.510201  |
| O    | 5.289339  | 5.273740  | 8.877260  |
| N    | 7.249730  | 7.188939  | 3.952175  |
| H    | 6.810467  | 7.674173  | 4.754041  |
| C    | 5.328027  | 3.310216  | 0.936462  |
| C    | 4.310833  | 4.247834  | 0.730942  |
| H    | 3.989688  | 4.883995  | 1.550487  |
| C    | 3.706293  | 4.369461  | -0.519613 |
| H    | 2.916001  | 5.099986  | -0.665709 |
| C    | 4.107994  | 3.554103  | -1.572747 |
| H    | 3.632143  | 3.644735  | -2.544807 |
| C    | 5.124544  | 2.618551  | -1.379143 |
| H    | 5.443393  | 1.981770  | -2.199119 |
| C    | 5.733155  | 2.499357  | -0.135027 |
| H    | 6.537751  | 1.780312  | -0.004921 |
| C    | 7.888528  | 3.406681  | 2.218366  |
| C    | 8.846873  | 2.948008  | 3.133488  |
| H    | 8.536039  | 2.396124  | 4.015681  |
| C    | 10.199092 | 3.212558  | 2.933513  |
| H    | 10.929371 | 2.843474  | 3.647893  |
| C    | 10.614347 | 3.946939  | 1.823406  |
| H    | 11.669793 | 4.149346  | 1.666719  |
| C    | 9.669382  | 4.411256  | 0.910974  |
| H    | 9.985779  | 4.972941  | 0.036442  |
| C    | 8.315077  | 4.142595  | 1.104407  |
| H    | 7.590586  | 4.489770  | 0.373013  |
| C    | 6.045959  | 1.333689  | 2.859216  |
| H    | 6.276867  | 0.661739  | 2.033789  |
| C    | 5.712769  | 0.861931  | 4.064534  |
| H    | 5.660682  | -0.209642 | 4.252296  |
| C    | 3.952680  | 1.293382  | 6.298632  |
| C    | 3.989168  | -0.067895 | 6.633438  |
| H    | 4.851081  | -0.675570 | 6.370824  |
| C    | 2.936091  | -0.649899 | 7.328552  |
| H    | 2.972759  | -1.706302 | 7.577936  |
| C    | 1.841041  | 0.123991  | 7.712363  |
| H    | 1.020662  | -0.331292 | 8.259564  |
| C    | 1.806584  | 1.479638  | 7.402655  |

|   |          |           |           |
|---|----------|-----------|-----------|
| H | 0.968037 | 2.095163  | 7.713543  |
| C | 2.856824 | 2.063413  | 6.696234  |
| H | 2.826748 | 3.123704  | 6.466939  |
| C | 6.735669 | 1.734600  | 6.584370  |
| C | 7.862099 | 0.982956  | 6.234726  |
| H | 7.942689 | 0.545367  | 5.243292  |
| C | 8.881528 | 0.768359  | 7.161118  |
| H | 9.745534 | 0.172087  | 6.881507  |
| C | 8.785070 | 1.303026  | 8.442441  |
| H | 9.577452 | 1.131514  | 9.165171  |
| C | 7.662228 | 2.048607  | 8.798855  |
| H | 7.574990 | 2.462264  | 9.799209  |
| C | 6.642207 | 2.262153  | 7.877963  |
| H | 5.767847 | 2.833853  | 8.174007  |
| C | 3.536804 | 3.555233  | 3.868772  |
| C | 7.959078 | 5.985719  | 4.495092  |
| H | 8.804574 | 6.371619  | 5.071282  |
| C | 6.141411 | 6.915588  | 2.984145  |
| H | 5.894893 | 7.878507  | 2.530247  |
| C | 5.141130 | 5.668860  | 7.795259  |
| C | 6.998880 | 8.660128  | 7.951132  |
| C | 7.194693 | 9.890535  | 8.596680  |
| H | 6.546504 | 10.734756 | 8.375888  |
| C | 8.230056 | 10.048888 | 9.511318  |
| H | 8.370710 | 11.004612 | 10.007736 |
| C | 9.085294 | 8.982385  | 9.790388  |
| H | 9.891318 | 9.107597  | 10.507477 |
| C | 8.902728 | 7.759659  | 9.151818  |
| H | 9.563196 | 6.925575  | 9.370108  |
| C | 7.862916 | 7.596786  | 8.237282  |
| H | 7.712046 | 6.635666  | 7.752100  |
| C | 5.953286 | 9.683545  | 5.471390  |
| C | 7.204709 | 10.296266 | 5.302307  |
| H | 7.993898 | 10.126546 | 6.029708  |
| C | 7.438338 | 11.143807 | 4.219152  |
| H | 8.408436 | 11.621336 | 4.111468  |
| C | 6.428095 | 11.397061 | 3.293397  |
| H | 6.608730 | 12.065828 | 2.457075  |
| C | 5.179789 | 10.794466 | 3.453354  |
| H | 4.383056 | 10.992925 | 2.742010  |
| C | 4.945375 | 9.937688  | 4.525111  |
| H | 3.973130 | 9.461079  | 4.624546  |
| C | 4.196058 | 9.097589  | 7.630808  |
| H | 4.318555 | 10.017016 | 8.201764  |
| C | 3.014931 | 8.476823  | 7.561617  |
| H | 2.141132 | 8.864954  | 8.084397  |
| C | 1.744975 | 7.435301  | 5.225799  |
| C | 1.273509 | 8.747611  | 5.099095  |
| H | 1.554952 | 9.504070  | 5.825510  |
| C | 0.434711 | 9.099953  | 4.043318  |

|   |           |           |           |
|---|-----------|-----------|-----------|
| H | 0.074048  | 10.121463 | 3.962972  |
| C | 0.049314  | 8.145922  | 3.105762  |
| H | -0.611907 | 8.419911  | 2.288920  |
| C | 0.514294  | 6.837640  | 3.221803  |
| H | 0.220474  | 6.084914  | 2.496111  |
| C | 1.363259  | 6.486920  | 4.267264  |
| H | 1.723492  | 5.465469  | 4.333897  |
| C | 1.736528  | 5.982791  | 7.717835  |
| C | 0.555302  | 5.373788  | 7.280024  |
| H | 0.246898  | 5.455378  | 6.243245  |
| C | -0.257478 | 4.683924  | 8.178049  |
| H | -1.178722 | 4.229835  | 7.823780  |
| C | 0.096511  | 4.593930  | 9.521878  |
| H | -0.542632 | 4.062738  | 10.221082 |
| C | 1.269549  | 5.199496  | 9.966856  |
| H | 1.551465  | 5.142211  | 11.014105 |
| C | 2.084113  | 5.887701  | 9.073149  |
| H | 2.990576  | 6.358589  | 9.440906  |
| H | 8.330678  | 5.417818  | 3.640391  |
| H | 6.532549  | 6.234566  | 2.223817  |
| H | 4.368327  | 4.547405  | 5.744094  |
| H | 7.924212  | 7.838726  | 3.535297  |

---

**Table S33:** Cartesian coordinates of the optimized structure of *unsym*-[ $\mu$ H-(Fe<sup>II</sup>Fe<sup>II</sup>)adt-H]<sup>2+</sup> (-4788.98064496  $E_h$ )

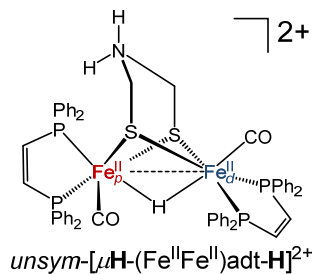

| atom | x         | y         | z        |
|------|-----------|-----------|----------|
| Fe   | 4.583752  | 13.791232 | 3.803022 |
| Fe   | 5.854101  | 11.434970 | 3.765144 |
| H    | 5.334713  | 12.628474 | 4.814009 |
| S    | 3.691159  | 11.840958 | 3.006981 |
| S    | 6.381047  | 13.287249 | 2.513582 |
| P    | 2.826438  | 14.263989 | 5.185646 |
| P    | 5.161437  | 9.861259  | 5.270622 |
| P    | 5.619423  | 15.551124 | 4.814014 |
| P    | 6.663693  | 9.696406  | 2.525023 |
| O    | 3.387857  | 15.424157 | 1.739331 |
| O    | 8.486291  | 11.447130 | 5.008086 |
| C    | 3.560275  | 12.038996 | 1.206740 |
| C    | 5.839739  | 13.162833 | 0.784051 |
| C    | 7.434685  | 11.455439 | 4.541021 |
| C    | 3.849482  | 14.830742 | 2.618650 |
| C    | 6.416649  | 16.799784 | 3.734550 |
| C    | 5.587183  | 17.631649 | 2.967987 |
| H    | 4.506206  | 17.552481 | 3.043244 |
| C    | 6.137805  | 18.589671 | 2.122510 |
| H    | 5.484183  | 19.237406 | 1.546106 |
| C    | 7.521447  | 18.725352 | 2.027994 |
| H    | 7.951079  | 19.476688 | 1.372530 |
| C    | 8.350471  | 17.906977 | 2.790557 |
| H    | 9.428874  | 18.021139 | 2.735655 |
| C    | 7.804480  | 16.949859 | 3.642691 |
| H    | 8.466564  | 16.344459 | 4.252039 |
| C    | 6.812082  | 15.233771 | 6.161100 |
| C    | 6.593915  | 15.708390 | 7.460302 |
| H    | 5.696092  | 16.269474 | 7.699536 |
| C    | 7.530923  | 15.465797 | 8.462552 |
| H    | 7.355440  | 15.848475 | 9.463452 |
| C    | 8.692054  | 14.750112 | 8.179953 |
| H    | 9.427998  | 14.576253 | 8.959284 |
| C    | 8.911820  | 14.264255 | 6.891518 |
| H    | 9.812748  | 13.702586 | 6.664832 |
| C    | 7.975224  | 14.500822 | 5.889339 |
| H    | 8.159286  | 14.121172 | 4.888282 |
| C    | 1.213233  | 14.289598 | 4.335213 |
| C    | 0.665352  | 15.490920 | 3.869909 |
| H    | 1.172550  | 16.434831 | 4.049451 |
| C    | -0.540402 | 15.490188 | 3.171790 |
| H    | -0.959717 | 16.428748 | 2.822551 |
| C    | -1.207562 | 14.292154 | 2.931452 |
| H    | -2.151345 | 14.294007 | 2.394668 |
| C    | -0.665670 | 13.091073 | 3.388119 |
| H    | -1.188366 | 12.155938 | 3.209783 |

|   |           |           |           |
|---|-----------|-----------|-----------|
| C | 0.540671  | 13.084532 | 4.082036  |
| H | 0.948667  | 12.143158 | 4.440035  |
| C | 2.500967  | 13.488192 | 6.811237  |
| C | 3.594323  | 13.163559 | 7.623253  |
| H | 4.606431  | 13.296982 | 7.251686  |
| C | 3.391173  | 12.668200 | 8.908123  |
| H | 4.246025  | 12.406954 | 9.523659  |
| C | 2.095941  | 12.497634 | 9.393922  |
| H | 1.937501  | 12.111905 | 10.396441 |
| C | 1.004016  | 12.829893 | 8.594478  |
| H | -0.006380 | 12.712261 | 8.974862  |
| C | 1.201147  | 13.326535 | 7.307921  |
| H | 0.343493  | 13.590819 | 6.698027  |
| C | 8.391825  | 9.756316  | 1.929244  |
| C | 9.057328  | 8.569863  | 1.579594  |
| H | 8.556309  | 7.609077  | 1.651961  |
| C | 10.367907 | 8.608597  | 1.116925  |
| H | 10.873498 | 7.683878  | 0.856595  |
| C | 11.029570 | 9.829535  | 0.989193  |
| H | 12.053991 | 9.856468  | 0.630856  |
| C | 10.375062 | 11.011500 | 1.322900  |
| H | 10.887178 | 11.964088 | 1.227003  |
| C | 9.063789  | 10.976884 | 1.792907  |
| H | 8.570887  | 11.905206 | 2.065806  |
| C | 5.731165  | 9.126385  | 1.034660  |
| C | 6.320748  | 9.072692  | -0.239044 |
| H | 7.366478  | 9.335500  | -0.366954 |
| C | 5.574561  | 8.658865  | -1.343376 |
| H | 6.045269  | 8.612190  | -2.320896 |
| C | 4.242530  | 8.282136  | -1.189294 |
| H | 3.669606  | 7.944780  | -2.047693 |
| C | 3.648715  | 8.328427  | 0.073465  |
| H | 2.614007  | 8.023409  | 0.199974  |
| C | 4.382222  | 8.755097  | 1.176744  |
| H | 3.904692  | 8.800386  | 2.152091  |
| C | 3.416869  | 9.302137  | 5.325839  |
| C | 2.492165  | 10.001142 | 6.111093  |
| H | 2.810496  | 10.849965 | 6.707294  |
| C | 1.163042  | 9.589238  | 6.159490  |
| H | 0.460341  | 10.133453 | 6.783047  |
| C | 0.743051  | 8.476718  | 5.432277  |
| H | -0.291440 | 8.150767  | 5.482836  |
| C | 1.660787  | 7.768757  | 4.660661  |
| H | 1.347489  | 6.883584  | 4.115047  |
| C | 5.619190  | 10.022118 | 7.034312  |
| C | 5.264695  | 8.993162  | 7.920648  |
| H | 4.659416  | 8.157975  | 7.578206  |
| C | 5.672776  | 9.039121  | 9.248611  |
| H | 5.397018  | 8.235639  | 9.924676  |
| C | 6.437208  | 10.111625 | 9.708427  |

|   |          |           |           |
|---|----------|-----------|-----------|
| H | 6.763431 | 10.140344 | 10.743770 |
| C | 6.778588 | 11.144252 | 8.839192  |
| H | 7.366633 | 11.987009 | 9.189801  |
| C | 6.368568 | 11.103066 | 7.507733  |
| H | 6.631730 | 11.924334 | 6.850463  |
| C | 6.013788 | 8.318245  | 4.791646  |
| H | 5.986763 | 7.471753  | 5.476842  |
| C | 6.634184 | 8.235144  | 3.612569  |
| H | 7.126535 | 7.318472  | 3.294490  |
| C | 4.300749 | 16.527176 | 5.606738  |
| H | 4.527192 | 17.529228 | 5.968724  |
| C | 3.083687 | 15.989016 | 5.726256  |
| H | 2.267873 | 16.514482 | 6.221668  |
| C | 2.991593 | 8.177773  | 4.606540  |
| H | 3.701213 | 7.594093  | 4.027139  |
| N | 4.871617 | 12.058368 | 0.476024  |
| H | 5.325456 | 11.143704 | 0.648996  |
| H | 3.015878 | 11.186975 | 0.794148  |
| H | 3.030167 | 12.960755 | 0.959708  |
| H | 5.371373 | 14.100223 | 0.475230  |
| H | 6.714235 | 12.976383 | 0.155199  |
| H | 4.675439 | 12.081512 | -0.531658 |

---

**Table S34:** Cartesian coordinates of the optimized structure of *unsym*-[ $\mu$ H-(Fe<sup>I</sup>Fe<sup>II</sup>)adt-H]<sup>+</sup> (-4789.23512869  $E_h$ )

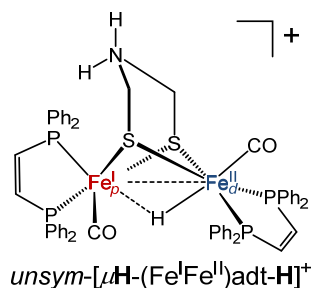

| atom | x         | y         | z        |
|------|-----------|-----------|----------|
| Fe   | 4.566097  | 13.944536 | 3.859759 |
| Fe   | 5.939545  | 11.395469 | 3.778873 |
| H    | 5.215482  | 12.989288 | 4.932288 |
| S    | 3.753071  | 11.916881 | 3.089418 |
| S    | 6.475588  | 13.402288 | 2.683760 |
| P    | 2.795735  | 14.361583 | 5.155704 |
| P    | 5.264791  | 9.805047  | 5.238033 |
| P    | 5.525443  | 15.687597 | 4.869542 |
| P    | 6.693127  | 9.580286  | 2.417726 |
| O    | 3.438811  | 15.519064 | 1.677341 |
| O    | 8.588264  | 11.390424 | 4.982905 |
| C    | 3.726451  | 12.077069 | 1.281735 |
| C    | 5.969557  | 13.276063 | 0.945231 |
| C    | 7.517491  | 11.390493 | 4.530620 |
| C    | 3.876050  | 14.927459 | 2.576694 |
| C    | 6.345866  | 16.952713 | 3.822678 |
| C    | 5.546594  | 17.819534 | 3.065515 |
| H    | 4.463369  | 17.763180 | 3.132969 |
| C    | 6.129761  | 18.765917 | 2.228408 |
| H    | 5.498636  | 19.438503 | 1.654781 |
| C    | 7.517082  | 18.852079 | 2.131228 |
| H    | 7.972379  | 19.592040 | 1.479544 |
| C    | 8.317466  | 17.992369 | 2.879079 |
| H    | 9.399567  | 18.060118 | 2.814218 |
| C    | 7.737533  | 17.048181 | 3.722915 |
| H    | 8.373366  | 16.396398 | 4.313710 |
| C    | 6.716219  | 15.411391 | 6.234726 |
| C    | 6.622005  | 16.081882 | 7.459658 |
| H    | 5.817300  | 16.786954 | 7.641846 |
| C    | 7.556062  | 15.844470 | 8.465524 |
| H    | 7.469769  | 16.370052 | 9.412098 |
| C    | 8.597524  | 14.943031 | 8.257899 |
| H    | 9.329169  | 14.766676 | 9.041162 |
| C    | 8.699189  | 14.269936 | 7.041391 |
| H    | 9.501964  | 13.559372 | 6.869126 |
| C    | 7.760440  | 14.499294 | 6.038938 |
| H    | 7.841649  | 13.962441 | 5.099505 |
| C    | 1.174686  | 14.356754 | 4.310749 |
| C    | 0.613750  | 15.542920 | 3.824363 |
| H    | 1.110628  | 16.494026 | 3.995655 |
| C    | -0.583453 | 15.517969 | 3.112344 |
| H    | -1.009970 | 16.446615 | 2.744703 |
| C    | -1.230347 | 14.308083 | 2.876529 |
| H    | -2.165991 | 14.289500 | 2.325356 |
| C    | -0.674724 | 13.120950 | 3.351497 |
| H    | -1.176102 | 12.174326 | 3.171127 |

|   |           |           |           |
|---|-----------|-----------|-----------|
| C | 0.522800  | 13.140563 | 4.060367  |
| H | 0.947673  | 12.208682 | 4.422806  |
| C | 2.466425  | 13.547556 | 6.768823  |
| C | 3.559333  | 13.143781 | 7.544392  |
| H | 4.564699  | 13.235337 | 7.143078  |
| C | 3.361396  | 12.609124 | 8.814760  |
| H | 4.217456  | 12.282303 | 9.396903  |
| C | 2.070777  | 12.474145 | 9.322192  |
| H | 1.916112  | 12.051904 | 10.310836 |
| C | 0.978380  | 12.881189 | 8.558998  |
| H | -0.029301 | 12.784909 | 8.953273  |
| C | 1.172206  | 13.419699 | 7.288950  |
| H | 0.314631  | 13.738071 | 6.704536  |
| C | 8.404835  | 9.570515  | 1.757504  |
| C | 9.035074  | 8.392239  | 1.329913  |
| H | 8.505105  | 7.443886  | 1.361511  |
| C | 10.337272 | 8.426052  | 0.843072  |
| H | 10.816126 | 7.506946  | 0.518249  |
| C | 11.026060 | 9.637116  | 0.772519  |
| H | 12.044045 | 9.660683  | 0.394874  |
| C | 10.408700 | 10.812380 | 1.189290  |
| H | 10.943656 | 11.756395 | 1.142129  |
| C | 9.105292  | 10.779756 | 1.682595  |
| H | 8.634657  | 11.696381 | 2.029026  |
| C | 5.710559  | 8.927748  | 0.990982  |
| C | 6.204842  | 8.889170  | -0.321422 |
| H | 7.247059  | 9.125361  | -0.515796 |
| C | 5.373945  | 8.526154  | -1.381659 |
| H | 5.777117  | 8.490385  | -2.389958 |
| C | 4.041838  | 8.191178  | -1.149780 |
| H | 3.400243  | 7.898448  | -1.975564 |
| C | 3.538730  | 8.229552  | 0.150895  |
| H | 2.502409  | 7.965991  | 0.343110  |
| C | 4.360243  | 8.606124  | 1.209902  |
| H | 3.945970  | 8.657744  | 2.213709  |
| C | 3.521543  | 9.214817  | 5.302497  |
| C | 2.570383  | 9.982149  | 5.986319  |
| H | 2.870502  | 10.891118 | 6.497901  |
| C | 1.240172  | 9.576642  | 6.036140  |
| H | 0.520419  | 10.180344 | 6.581448  |
| C | 0.838736  | 8.400595  | 5.403791  |
| H | -0.198738 | 8.082269  | 5.449143  |
| C | 1.778256  | 7.627714  | 4.728327  |
| H | 1.479503  | 6.699639  | 4.249013  |
| C | 5.686062  | 9.920659  | 7.024141  |
| C | 5.321904  | 8.893172  | 7.905916  |
| H | 4.736575  | 8.049938  | 7.547984  |
| C | 5.690125  | 8.950402  | 9.245553  |
| H | 5.405309  | 8.146534  | 9.918149  |
| C | 6.423581  | 10.036747 | 9.723153  |



|   |          |           |           |
|---|----------|-----------|-----------|
| H | 6.715968 | 10.076925 | 10.768581 |
| C | 6.776756 | 11.068625 | 8.857863  |
| H | 7.341620 | 11.922676 | 9.220465  |
| C | 6.406762 | 11.012676 | 7.514768  |
| H | 6.678043 | 11.827162 | 6.851590  |
| C | 6.127963 | 8.259520  | 4.762975  |
| H | 6.146462 | 7.428418  | 5.467853  |
| C | 6.710828 | 8.154951  | 3.565151  |
| H | 7.217269 | 7.238270  | 3.265742  |
| C | 4.185234 | 16.654540 | 5.650453  |
| H | 4.379129 | 17.657930 | 6.027034  |
| C | 2.978928 | 16.086292 | 5.742725  |
| H | 2.140739 | 16.584064 | 6.229570  |
| C | 3.112503 | 8.030500  | 4.678851  |
| H | 3.836926 | 7.404533  | 4.165542  |
| N | 5.108952 | 12.072830 | 0.693479  |
| H | 5.593217 | 11.272035 | 1.143025  |
| H | 3.224479 | 11.209031 | 0.848109  |
| H | 3.229851 | 12.994222 | 0.957570  |
| H | 5.414941 | 14.157366 | 0.615067  |
| H | 6.856271 | 13.145846 | 0.318788  |
| H | 5.055367 | 11.878758 | -0.311669 |

---

## References

- (1) Carroll, M. E.; Barton, B. E.; Rauchfuss, T. B.; Carroll, P. J. *J. Am. Chem. Soc.* **2012**, *134*, 18843.
- (2) Wang, W.; Rauchfuss, T. B.; Bertini, L.; Zampella, G. *J. Am. Chem. Soc.* **2012**, *134*, 4525.
- (3) Izutsu, K. *Acid-Base Dissociation Constants in Dipolar Aprotic Solvents*; Blackwell Scientific Publications: Oxford, U.K., 1990.
- (4) Bullock, R. M. *Comments Inorg. Chem.* **1991**, *12*, 1.
- (5) Kaljurand, I.; Kütt, A.; Sooväli, L.; Rodima, T.; Mäemets, V.; Leito, I.; Koppel, I. *A. J. Org. Chem.* **2005**, *70*, 1019.
- (6) Alecu, I. M.; Zheng, J.; Zhao, Y.; Truhlar, D. G. *J. Chem. Theory Comput.* **2010**, *6*, 2872.
- (7) Justice, A. K.; De Gioia, L.; Nilges, M. J.; Rauchfuss, T. B.; Wilson, S. R.; Zampella, G. *Inorg. Chem.* **2008**, *47*, 7405.
- (8) Ezzaher, S.; Capon, J.-F.; Dumontet, N.; Gloaguen, F.; Pétillon, F. Y.; Schollhammer, P.; Talarmin, J. *J. Electroanal. Chem.* **2009**, *626*, 161.
